# Supplementary material
Source: publisher figshare collection journal article supplement (https://acs.figshare.com/ndownloader/files/28483346)
Supplement: Supplementary file 1 [file 28483346]

 
data_jyy168 
  
_audit_creation_method            'SHELXL-2014/7' 
_shelx_SHELXL_version_number      '2014/7' 
_chemical_name_systematic         ? 
_chemical_name_common             ? 
_chemical_melting_point           ? 
_chemical_formula_moiety          ? 
_chemical_formula_sum 
 'C9 H19 B F4 N O Rh S2' 
_chemical_formula_weight          411.09 
  
loop_ 
 _atom_type_symbol 
 _atom_type_description 
 _atom_type_scat_dispersion_real 
 _atom_type_scat_dispersion_imag 
 _atom_type_scat_source 
 'C'  'C'   0.0033   0.0016 
 'International Tables Vol C Tables 4.2.6.8 and 6.1.1.4' 
 'H'  'H'   0.0000   0.0000 
 'International Tables Vol C Tables 4.2.6.8 and 6.1.1.4' 
 'B'  'B'   0.0013   0.0007 
 'International Tables Vol C Tables 4.2.6.8 and 6.1.1.4' 
 'N'  'N'   0.0061   0.0033 
 'International Tables Vol C Tables 4.2.6.8 and 6.1.1.4' 
 'O'  'O'   0.0106   0.0060 
 'International Tables Vol C Tables 4.2.6.8 and 6.1.1.4' 
 'F'  'F'   0.0171   0.0103 
 'International Tables Vol C Tables 4.2.6.8 and 6.1.1.4' 
 'S'  'S'   0.1246   0.1234 
 'International Tables Vol C Tables 4.2.6.8 and 6.1.1.4' 
 'Rh'  'Rh'  -1.1178   0.9187 
 'International Tables Vol C Tables 4.2.6.8 and 6.1.1.4' 
  
_space_group_crystal_system       triclinic 
_space_group_IT_number            2 
_space_group_name_H-M_alt         'P -1' 
_space_group_name_Hall            '-P 1' 
  
_shelx_space_group_comment 
; 
The symmetry employed for this shelxl refinement is uniquely defined 
by the following loop, which should always be used as a source of 
symmetry information in preference to the above space-group names. 
They are only intended as comments. 
; 
  
loop_ 
 _space_group_symop_operation_xyz 
 'x, y, z' 
 '-x, -y, -z' 
  
_cell_length_a                    8.2674(9) 
_cell_length_b                    9.8268(10) 
_cell_length_c                    10.9563(11) 
_cell_angle_alpha                 116.5646(11) 
_cell_angle_beta                  96.3920(12) 
_cell_angle_gamma                 103.0219(11) 
_cell_volume                      752.34(14) 
_cell_formula_units_Z             2 
_cell_measurement_temperature     88(2) 
_cell_measurement_reflns_used     9799 
_cell_measurement_theta_min       2.61 
_cell_measurement_theta_max       29.09 
  
_exptl_crystal_description        Plate 
_exptl_crystal_colour             yellow 
_exptl_crystal_density_meas       not_measured 
_exptl_crystal_density_method     not_measured 
_exptl_crystal_density_diffrn     1.815 
_exptl_crystal_F_000              412 
_exptl_transmission_factor_min    ? 
_exptl_transmission_factor_max    ? 
_exptl_crystal_size_max           0.372 
_exptl_crystal_size_mid           0.215 
_exptl_crystal_size_min           0.150 
_exptl_absorpt_coefficient_mu     1.445 
_shelx_estimated_absorpt_T_min    0.616 
_shelx_estimated_absorpt_T_max    0.812 
_exptl_absorpt_correction_type    multi-scan 
_exptl_absorpt_correction_T_min   0.6406 
_exptl_absorpt_correction_T_max   0.7458 
_exptl_absorpt_process_details    'TWINABS 2012/1' 
_exptl_absorpt_special_details     
; 
HKLF 5 dataset constructed from all observations involving domain 1 
5186 Corrected reflections written to file twin5.hkl 
Reflections merged according to point-group -1 
Single reflections that also occur in composites omitted 
Minimum and maximum apparent transmission:  0.6406  0.7458 
Additional spherical absorption correction applied with mu*r =  0.2000 
; 
_diffrn_ambient_temperature       88(2) 
_diffrn_radiation_wavelength      0.71073 
_diffrn_radiation_type            MoK\a 
_diffrn_source                    'fine-focus sealed tube' 
_diffrn_measurement_device_type   'Bruker SMART APEX II CCD' 
_diffrn_measurement_method        '\f and \w scans' 
_diffrn_detector_area_resol_mean  ? 
_diffrn_reflns_number             3604 
_diffrn_reflns_av_unetI/netI      0.0182 
_diffrn_reflns_av_R_equivalents    ? 
_diffrn_reflns_limit_h_min        -11 
_diffrn_reflns_limit_h_max        11 
_diffrn_reflns_limit_k_min        -13 
_diffrn_reflns_limit_k_max        11 
_diffrn_reflns_limit_l_min        0 
_diffrn_reflns_limit_l_max        14 
_diffrn_reflns_theta_min          2.143 
_diffrn_reflns_theta_max          29.093 
_diffrn_reflns_theta_full         25.242 
_diffrn_measured_fraction_theta_max   0.902 
_diffrn_measured_fraction_theta_full  0.998 
_diffrn_reflns_Laue_measured_fraction_max    0.902 
_diffrn_reflns_Laue_measured_fraction_full   0.998 
_diffrn_reflns_point_group_measured_fraction_max   0.902 
_diffrn_reflns_point_group_measured_fraction_full  0.998 
_reflns_number_total              3604 
_reflns_number_gt                 3513 
_reflns_threshold_expression      'I > 2\s(I)' 
_reflns_Friedel_coverage          0.000 
_reflns_Friedel_fraction_max      . 
_reflns_Friedel_fraction_full     . 
  
_reflns_special_details 
; 
 _reflns_Friedel_fraction is defined as the number of unique 
 Friedel pairs measured divided by the number that would be 
 possible theoretically, ignoring centric projections and 
 systematic absences. 
; 
  
_computing_data_collection        'Bruker APEX2 2014.11-0, 2014' 
_computing_cell_refinement        'Bruker SAINT 8.34a, 2013' 
_computing_data_reduction         'Bruker SAINT 8.34a, 2013' 
_computing_structure_solution     'Bruker SHELXTL 2014/4' 
_computing_structure_refinement 'SHELXL-2014/7 (Sheldrick, 2014)' 
_computing_molecular_graphics     'Bruker SHELXTL' 
_computing_publication_material   'Bruker SHELXTL' 
_refine_special_details 
; 
A yellow crystal of approximate dimensions 0.150 x 0.215 x 0.372 mm 
was mounted in a cryoloop and transferred to a Bruker SMART APEX II 
diffractometer system.  The APEX2 program package and the CELL_NOW 
were used to determine the unit-cell parameters.  Data was collected 
using a 20 sec/frame scan time.  The raw frame data was processed using 
SAINT and TWINABS to yield the reflection data file (HKLF5 format).  
Subsequent calculations were carried out using the SHELXTL program 
package.  There were neither systematic absences nor any diffraction 
symmetry other than the Friedel condition. The centrosymmetric triclinic 
space group P-1 was assigned and later determined to be correct.

The structure was solved by direct methods and refined on F2 by 
full-matrix least-squares techniques.  The analytical scattering factors 
for neutral atoms were used throughout the analysis.  Hydrogen atoms 
were included using a riding model.  

Least-squares analysis yielded wR2 = 0.0546 and Goof = 1.068 for 175 
variables refined against 3604 data (0.73 �), R1 = 0.0204 for those 3513 
with I > 2.0sigma(I).  The structure was refined as a two-component 
twin, BASF = 0.3037.
; 
_refine_ls_structure_factor_coef  Fsqd 
_refine_ls_matrix_type            full 
_refine_ls_weighting_scheme       calc 
_refine_ls_weighting_details 
'w=1/[\s^2^(Fo^2^)+(0.0273P)^2^+0.7557P] where P=(Fo^2^+2Fc^2^)/3' 
_atom_sites_solution_primary      direct 
_atom_sites_solution_secondary    difmap 
_atom_sites_solution_hydrogens    geom 
_refine_ls_hydrogen_treatment     constr 
_refine_ls_extinction_method      none 
_refine_ls_extinction_coef        ? 
_refine_ls_number_reflns          3604 
_refine_ls_number_parameters      175 
_refine_ls_number_restraints      0 
_refine_ls_R_factor_all           0.0211 
_refine_ls_R_factor_gt            0.0204 
_refine_ls_wR_factor_ref          0.0546 
_refine_ls_wR_factor_gt           0.0541 
_refine_ls_goodness_of_fit_ref    1.068 
_refine_ls_restrained_S_all       1.068 
_refine_ls_shift/su_max           0.001 
_refine_ls_shift/su_mean          0.000 
  
loop_ 
 _atom_site_label 
 _atom_site_type_symbol 
 _atom_site_fract_x 
 _atom_site_fract_y 
 _atom_site_fract_z 
 _atom_site_U_iso_or_equiv 
 _atom_site_adp_type 
 _atom_site_occupancy 
 _atom_site_site_symmetry_order 
 _atom_site_calc_flag 
 _atom_site_refinement_flags_posn 
 _atom_site_refinement_flags_adp 
 _atom_site_refinement_flags_occupancy 
 _atom_site_disorder_assembly 
 _atom_site_disorder_group 
Rh1 Rh 0.56611(2) 0.77905(2) 0.50168(2) 0.00969(5) Uani 1 1 d . . . . . 
S1 S 0.65387(7) 1.04615(6) 0.66931(5) 0.01290(10) Uani 1 1 d . . . . . 
S2 S 0.42735(7) 0.51307(6) 0.33665(5) 0.01178(10) Uani 1 1 d . . . . . 
O1 O 0.8889(2) 0.8094(2) 0.4055(2) 0.0261(4) Uani 1 1 d . . . . . 
N1 N 0.3478(2) 0.7643(2) 0.58334(19) 0.0118(3) Uani 1 1 d . . . . . 
H1 H 0.3656 0.7193 0.6477 0.014 Uiso 1 1 calc R U . . . 
C1 C 0.7627(3) 0.7936(3) 0.4390(2) 0.0151(4) Uani 1 1 d . . . . . 
C2 C 0.3257(3) 0.9235(3) 0.6699(2) 0.0157(4) Uani 1 1 d . . . . . 
H2A H 0.2386 0.9130 0.7230 0.019 Uiso 1 1 calc R U . . . 
H2B H 0.2852 0.9636 0.6078 0.019 Uiso 1 1 calc R U . . . 
C3 C 0.4943(3) 1.0405(3) 0.7714(2) 0.0179(4) Uani 1 1 d . . . . . 
H3A H 0.5303 1.0060 0.8393 0.021 Uiso 1 1 calc R U . . . 
H3B H 0.4821 1.1483 0.8245 0.021 Uiso 1 1 calc R U . . . 
C4 C 0.8524(3) 1.0991(3) 0.7941(2) 0.0170(4) Uani 1 1 d . . . . . 
H4A H 0.9496 1.1276 0.7557 0.020 Uiso 1 1 calc R U . . . 
H4B H 0.8600 1.1955 0.8827 0.020 Uiso 1 1 calc R U . . . 
C5 C 0.8715(4) 0.9692(3) 0.8280(3) 0.0273(6) Uani 1 1 d . . . . . 
H5A H 0.8573 0.8709 0.7405 0.041 Uiso 1 1 calc R U . . . 
H5B H 0.7841 0.9488 0.8765 0.041 Uiso 1 1 calc R U . . . 
H5C H 0.9855 1.0037 0.8888 0.041 Uiso 1 1 calc R U . . . 
C6 C 0.1927(3) 0.6487(3) 0.4693(2) 0.0137(4) Uani 1 1 d . . . . . 
H6A H 0.1667 0.6898 0.4042 0.016 Uiso 1 1 calc R U . . . 
H6B H 0.0932 0.6348 0.5100 0.016 Uiso 1 1 calc R U . . . 
C7 C 0.2253(3) 0.4900(3) 0.3902(2) 0.0136(4) Uani 1 1 d . . . . . 
H7A H 0.1300 0.4179 0.3056 0.016 Uiso 1 1 calc R U . . . 
H7B H 0.2281 0.4397 0.4508 0.016 Uiso 1 1 calc R U . . . 
C8 C 0.3664(3) 0.5121(3) 0.1705(2) 0.0168(4) Uani 1 1 d . . . . . 
H8A H 0.2976 0.5858 0.1830 0.020 Uiso 1 1 calc R U . . . 
H8B H 0.4711 0.5523 0.1451 0.020 Uiso 1 1 calc R U . . . 
C9 C 0.2636(3) 0.3462(3) 0.0508(2) 0.0190(5) Uani 1 1 d . . . . . 
H9A H 0.2322 0.3522 -0.0352 0.029 Uiso 1 1 calc R U . . . 
H9B H 0.1595 0.3059 0.0751 0.029 Uiso 1 1 calc R U . . . 
H9C H 0.3327 0.2737 0.0353 0.029 Uiso 1 1 calc R U . . . 
B1 B 0.2478(4) 0.6709(4) -0.1533(3) 0.0219(5) Uani 1 1 d . . . . . 
F1 F 0.1302(2) 0.7539(2) -0.12889(17) 0.0330(4) Uani 1 1 d . . . . . 
F2 F 0.4069(2) 0.7815(2) -0.13119(18) 0.0308(4) Uani 1 1 d . . . . . 
F3 F 0.2693(3) 0.6118(2) -0.06287(19) 0.0412(4) Uani 1 1 d . . . . . 
F4 F 0.2028(2) 0.55037(17) -0.29413(15) 0.0238(3) Uani 1 1 d . . . . . 
  
loop_ 
 _atom_site_aniso_label 
 _atom_site_aniso_U_11 
 _atom_site_aniso_U_22 
 _atom_site_aniso_U_33 
 _atom_site_aniso_U_23 
 _atom_site_aniso_U_13 
 _atom_site_aniso_U_12 
Rh1 0.00903(8) 0.01035(8) 0.00883(8) 0.00406(6) 0.00211(6) 0.00286(6) 
S1 0.0142(2) 0.0115(2) 0.0114(2) 0.00476(19) 0.00286(19) 0.00307(19) 
S2 0.0118(2) 0.0116(2) 0.0108(2) 0.00455(19) 0.00250(19) 0.00366(19) 
O1 0.0204(9) 0.0227(9) 0.0428(11) 0.0184(9) 0.0187(8) 0.0096(7) 
N1 0.0119(8) 0.0117(8) 0.0120(8) 0.0053(7) 0.0039(7) 0.0045(7) 
C1 0.0166(11) 0.0102(9) 0.0176(10) 0.0061(8) 0.0038(8) 0.0042(8) 
C2 0.0182(11) 0.0131(10) 0.0172(10) 0.0061(9) 0.0084(9) 0.0079(8) 
C3 0.0190(11) 0.0151(10) 0.0169(11) 0.0054(9) 0.0081(9) 0.0041(8) 
C4 0.0161(10) 0.0179(11) 0.0122(10) 0.0055(9) -0.0003(8) 0.0024(8) 
C5 0.0326(14) 0.0225(12) 0.0208(12) 0.0087(10) -0.0058(10) 0.0081(11) 
C6 0.0105(9) 0.0140(10) 0.0157(10) 0.0073(8) 0.0022(8) 0.0029(8) 
C7 0.0120(10) 0.0137(10) 0.0141(10) 0.0066(8) 0.0034(8) 0.0026(8) 
C8 0.0210(11) 0.0168(10) 0.0114(10) 0.0076(8) 0.0021(8) 0.0031(9) 
C9 0.0219(12) 0.0179(11) 0.0112(10) 0.0042(9) 0.0014(9) 0.0029(9) 
B1 0.0238(14) 0.0296(14) 0.0147(12) 0.0098(11) 0.0065(10) 0.0137(11) 
F1 0.0327(9) 0.0370(9) 0.0257(8) 0.0086(7) 0.0074(7) 0.0188(7) 
F2 0.0275(8) 0.0301(8) 0.0302(8) 0.0143(7) 0.0042(7) 0.0033(7) 
F3 0.0641(13) 0.0349(10) 0.0284(9) 0.0221(8) 0.0034(8) 0.0114(9) 
F4 0.0277(8) 0.0197(7) 0.0158(7) 0.0036(6) 0.0045(6) 0.0041(6) 
  
_geom_special_details 
; 
 All esds (except the esd in the dihedral angle between two l.s. planes) 
 are estimated using the full covariance matrix.  The cell esds are taken 
 into account individually in the estimation of esds in distances, angles 
 and torsion angles; correlations between esds in cell parameters are only 
 used when they are defined by crystal symmetry.  An approximate (isotropic) 
 treatment of cell esds is used for estimating esds involving l.s. planes. 
; 
  
loop_ 
 _geom_bond_atom_site_label_1 
 _geom_bond_atom_site_label_2 
 _geom_bond_distance 
 _geom_bond_site_symmetry_2 
 _geom_bond_publ_flag 
Rh1 C1 1.834(2) . ? 
Rh1 N1 2.1065(18) . ? 
Rh1 S1 2.3070(6) . ? 
Rh1 S2 2.3189(6) . ? 
S1 C4 1.820(2) . ? 
S1 C3 1.829(2) . ? 
S2 C8 1.830(2) . ? 
S2 C7 1.831(2) . ? 
O1 C1 1.145(3) . ? 
N1 C6 1.488(3) . ? 
N1 C2 1.490(3) . ? 
C2 C3 1.513(3) . ? 
C4 C5 1.515(3) . ? 
C6 C7 1.513(3) . ? 
C8 C9 1.522(3) . ? 
B1 F3 1.368(3) . ? 
B1 F1 1.379(3) . ? 
B1 F4 1.401(3) . ? 
B1 F2 1.421(3) . ? 
  
loop_ 
 _geom_angle_atom_site_label_1 
 _geom_angle_atom_site_label_2 
 _geom_angle_atom_site_label_3 
 _geom_angle 
 _geom_angle_site_symmetry_1 
 _geom_angle_site_symmetry_3 
 _geom_angle_publ_flag 
C1 Rh1 N1 177.09(9) . . ? 
C1 Rh1 S1 93.79(7) . . ? 
N1 Rh1 S1 85.16(5) . . ? 
C1 Rh1 S2 96.07(7) . . ? 
N1 Rh1 S2 85.18(5) . . ? 
S1 Rh1 S2 169.39(2) . . ? 
C4 S1 C3 102.51(11) . . ? 
C4 S1 Rh1 111.43(8) . . ? 
C3 S1 Rh1 98.90(8) . . ? 
C8 S2 C7 102.78(10) . . ? 
C8 S2 Rh1 105.39(8) . . ? 
C7 S2 Rh1 98.77(7) . . ? 
C6 N1 C2 112.75(17) . . ? 
C6 N1 Rh1 110.68(13) . . ? 
C2 N1 Rh1 113.02(13) . . ? 
O1 C1 Rh1 176.8(2) . . ? 
N1 C2 C3 109.84(18) . . ? 
C2 C3 S1 108.07(15) . . ? 
C5 C4 S1 114.82(17) . . ? 
N1 C6 C7 108.91(17) . . ? 
C6 C7 S2 111.95(15) . . ? 
C9 C8 S2 112.52(16) . . ? 
F3 B1 F1 112.8(2) . . ? 
F3 B1 F4 111.8(2) . . ? 
F1 B1 F4 110.0(2) . . ? 
F3 B1 F2 107.9(2) . . ? 
F1 B1 F2 106.7(2) . . ? 
F4 B1 F2 107.3(2) . . ? 
  
loop_ 
 _geom_torsion_atom_site_label_1 
 _geom_torsion_atom_site_label_2 
 _geom_torsion_atom_site_label_3 
 _geom_torsion_atom_site_label_4 
 _geom_torsion 
 _geom_torsion_site_symmetry_1 
 _geom_torsion_site_symmetry_2 
 _geom_torsion_site_symmetry_3 
 _geom_torsion_site_symmetry_4 
 _geom_torsion_publ_flag 
C6 N1 C2 C3 -172.90(17) . . . . ? 
Rh1 N1 C2 C3 -46.4(2) . . . . ? 
N1 C2 C3 S1 55.8(2) . . . . ? 
C4 S1 C3 C2 -151.88(16) . . . . ? 
Rh1 S1 C3 C2 -37.45(16) . . . . ? 
C3 S1 C4 C5 70.1(2) . . . . ? 
Rh1 S1 C4 C5 -34.8(2) . . . . ? 
C2 N1 C6 C7 -178.34(17) . . . . ? 
Rh1 N1 C6 C7 53.96(19) . . . . ? 
N1 C6 C7 S2 -50.3(2) . . . . ? 
C8 S2 C7 C6 -85.04(17) . . . . ? 
Rh1 S2 C7 C6 23.04(16) . . . . ? 
C7 S2 C8 C9 -73.67(18) . . . . ? 
Rh1 S2 C8 C9 -176.65(15) . . . . ? 
  
_refine_diff_density_max    1.626 
_refine_diff_density_min   -0.517 
_refine_diff_density_rms    0.085 
  
_shelx_res_file 
; 
  
    jyy168.res created by SHELXL-2014/7 
  
  
TITL jyy168.ins in P-1 
CELL 0.71073   8.26740   9.82680  10.95630 116.5646  96.3920 103.0219 
ZERR    2.00   0.00090   0.00100   0.00110   0.0011   0.0012   0.0011 
LATT  1 
SFAC C H B N O F S Rh 
UNIT 18 38 2 2 2 8 4 2 
SIZE 0.150 0.215 0.372 
TEMP -185.00 
  
L.S. 16 
FMAP 2 
PLAN 10 
  
CONF 
ACTA 
  
WGHT    0.027300    0.755700 
BASF   0.30370 
FVAR       0.71984 
RH1   8    0.566107    0.779053    0.501684    11.00000    0.00903    0.01035 = 
         0.00883    0.00406    0.00211    0.00286 
S1    7    0.653872    1.046148    0.669312    11.00000    0.01424    0.01151 = 
         0.01137    0.00476    0.00286    0.00307 
S2    7    0.427346    0.513067    0.336654    11.00000    0.01179    0.01158 = 
         0.01083    0.00455    0.00250    0.00366 
O1    5    0.888897    0.809367    0.405470    11.00000    0.02039    0.02273 = 
         0.04282    0.01842    0.01870    0.00956 
N1    4    0.347764    0.764330    0.583340    11.00000    0.01195    0.01173 = 
         0.01196    0.00529    0.00392    0.00449 
AFIX  13 
H1    2    0.365610    0.719315    0.647705    11.00000   -1.20000 
AFIX   0 
C1    1    0.762656    0.793586    0.438987    11.00000    0.01657    0.01019 = 
         0.01763    0.00611    0.00383    0.00422 
C2    1    0.325679    0.923451    0.669932    11.00000    0.01817    0.01308 = 
         0.01719    0.00607    0.00840    0.00791 
AFIX  23 
H2A   2    0.238648    0.913034    0.723043    11.00000   -1.20000 
H2B   2    0.285186    0.963633    0.607830    11.00000   -1.20000 
AFIX   0 
C3    1    0.494261    1.040526    0.771374    11.00000    0.01904    0.01514 = 
         0.01686    0.00542    0.00808    0.00409 
AFIX  23 
H3A   2    0.530252    1.006006    0.839335    11.00000   -1.20000 
H3B   2    0.482064    1.148279    0.824499    11.00000   -1.20000 
AFIX   0 
C4    1    0.852416    1.099144    0.794092    11.00000    0.01605    0.01793 = 
         0.01223    0.00550   -0.00029    0.00240 
AFIX  23 
H4A   2    0.949622    1.127598    0.755704    11.00000   -1.20000 
H4B   2    0.860018    1.195508    0.882668    11.00000   -1.20000 
AFIX   0 
C5    1    0.871511    0.969168    0.827967    11.00000    0.03260    0.02253 = 
         0.02079    0.00868   -0.00581    0.00815 
AFIX 137 
H5A   2    0.857325    0.870893    0.740547    11.00000   -1.50000 
H5B   2    0.784097    0.948834    0.876495    11.00000   -1.50000 
H5C   2    0.985463    1.003713    0.888768    11.00000   -1.50000 
AFIX   0 
C6    1    0.192686    0.648731    0.469258    11.00000    0.01046    0.01405 = 
         0.01573    0.00728    0.00225    0.00294 
AFIX  23 
H6A   2    0.166717    0.689813    0.404168    11.00000   -1.20000 
H6B   2    0.093213    0.634785    0.510006    11.00000   -1.20000 
AFIX   0 
C7    1    0.225297    0.489982    0.390159    11.00000    0.01195    0.01370 = 
         0.01411    0.00659    0.00343    0.00256 
AFIX  23 
H7A   2    0.130034    0.417867    0.305555    11.00000   -1.20000 
H7B   2    0.228098    0.439748    0.450769    11.00000   -1.20000 
AFIX   0 
C8    1    0.366387    0.512108    0.170468    11.00000    0.02096    0.01678 = 
         0.01142    0.00762    0.00213    0.00315 
AFIX  23 
H8A   2    0.297624    0.585787    0.183040    11.00000   -1.20000 
H8B   2    0.471105    0.552318    0.145137    11.00000   -1.20000 
AFIX   0 
C9    1    0.263572    0.346216    0.050759    11.00000    0.02193    0.01792 = 
         0.01118    0.00425    0.00139    0.00291 
AFIX 137 
H9A   2    0.232230    0.352180   -0.035247    11.00000   -1.50000 
H9B   2    0.159518    0.305892    0.075121    11.00000   -1.50000 
H9C   2    0.332748    0.273729    0.035303    11.00000   -1.50000 
AFIX   0 
B1    3    0.247830    0.670927   -0.153255    11.00000    0.02384    0.02958 = 
         0.01471    0.00977    0.00655    0.01371 
F1    6    0.130242    0.753884   -0.128890    11.00000    0.03273    0.03701 = 
         0.02568    0.00858    0.00737    0.01881 
F2    6    0.406862    0.781488   -0.131194    11.00000    0.02749    0.03014 = 
         0.03022    0.01432    0.00423    0.00328 
F3    6    0.269256    0.611823   -0.062865    11.00000    0.06408    0.03489 = 
         0.02838    0.02213    0.00337    0.01135 
F4    6    0.202837    0.550373   -0.294132    11.00000    0.02771    0.01971 = 
         0.01581    0.00359    0.00452    0.00405 
  
HKLF 5 
  
REM  jyy168.ins in P-1 
REM R1 =  0.0204 for    3513 Fo > 4sig(Fo)  and  0.0211 for all    3604 data 
REM    175 parameters refined using      0 restraints 
  
END 
  
WGHT      0.0273      0.7558 
  
REM Highest difference peak  1.626,  deepest hole -0.517,  1-sigma level  0.085 
Q1    1   0.0581  0.5194 -0.1490  11.00000  0.05    1.63 
Q2    1   0.3643  0.6466 -0.0830  11.00000  0.05    0.89 
Q3    1   0.1850  0.5935 -0.1525  11.00000  0.05    0.53 
Q4    1   0.2418  0.7878 -0.1177  11.00000  0.05    0.46 
Q5    1   0.0945  0.6570 -0.1206  11.00000  0.05    0.39 
Q6    1   0.3987  0.9963  0.7100  11.00000  0.05    0.36 
Q7    1   0.8505  1.0387  0.8174  11.00000  0.05    0.34 
Q8    1   0.5768  0.8006  0.5820  11.00000  0.05    0.33 
Q9    1   0.2673  0.7046  0.5299  11.00000  0.05    0.30 
Q10   1   0.7540  1.0847  0.7645  11.00000  0.05    0.30 
; 
_shelx_res_checksum    4324 
  
_shelx_hkl_file 
; 
   1   0   0 6698.56 64.0261  -2 
   1   0   0 6698.56 64.0261   1 
   2   0   0 40.4093 0.85069  -2 
   2   0   0 40.4093 0.85069   1 
   3   0   0 586.230 6.27791  -2 
   3   0   0 586.230 6.27791   1 
   4   0   0 599.842 6.66274  -2 
   4   0   0 599.842 6.66274   1 
   5   0   0 581.448 6.73346  -2 
   5   0   0 581.448 6.73346   1 
   6   0   0 852.015 9.53462  -2 
   6   0   0 852.015 9.53462   1 
   7   0   0 688.008 8.25713  -2 
   7   0   0 688.008 8.25713   1 
   8   0   0 491.906 7.93246  -2 
   8   0   0 491.906 7.93246   1 
   9   0   0 973.173 23.3758  -2 
   9   0   0 973.173 23.3758   1 
  -9   1   0 57.8004 3.18194   1 
  -8   1   0 68.5677 3.13756   1 
  -7   1   0 3.55621 0.64862   1 
  -6   1   0 18.5532 1.00731   1 
  -5   1   0 454.279 5.47360   1 
  -4   1   0 2594.41 24.9630   1 
  -3   1   0 1607.04 15.5897   1 
  -2   1   0 2.08831 0.27586   1 
  -1   1   0 183.609 2.34694   1 
   0   1   0 2.02524 0.18760   1 
   1   1   0 49.4914 0.96496   1 
   2   1   0 1263.46 12.2801   1 
   3   1   0 395.788 4.56025   1 
   4   1   0 208.999 3.01064   1 
   5   1   0 2618.17 25.6299   1 
   6   1   0 1266.82 13.4821   1 
   7   1   0 32.8715 1.63548   1 
   8   1   0 0.50565 1.05910   1 
   9   1   0 166.864 7.50270   1 
   9   2   0 113.071 7.31315  -2 
 -10   2   0 113.071 7.31315   1 
   8   2   0 375.175 8.76308  -2 
  -9   2   0 375.175 8.76308   1 
   7   2   0 412.368 8.94059  -2 
  -8   2   0 412.368 8.94059   1 
   6   2   0 1233.72 15.4605  -2 
  -7   2   0 1233.72 15.4605   1 
   5   2   0 687.221 7.95381  -2 
  -6   2   0 687.221 7.95381   1 
   4   2   0 534.597 9.04156  -2 
  -5   2   0 534.597 9.04156   1 
   3   2   0 271.167 5.06074  -2 
  -4   2   0 271.167 5.06074   1 
  -3   2   0 523.474 6.61527   1 
  -2   2   0 325.258 4.24926   1 
  -1   2   0 853.552 9.65931   1 
   0   2   0 293.807 4.45639   1 
   1   2   0 6.50600 0.50553   1 
  -3   2   0 1046.98 21.9554  -2 
   2   2   0 1046.98 21.9554   1 
  -4   2   0 158.559 2.87737  -2 
   3   2   0 158.559 2.87737   1 
  -5   2   0 767.796 8.41018  -2 
   4   2   0 767.796 8.41018   1 
  -6   2   0 823.410 9.19252  -2 
   5   2   0 823.410 9.19252   1 
  -7   2   0 1175.65 14.7036  -2 
   6   2   0 1175.65 14.7036   1 
  -8   2   0 579.424 8.66314  -2 
   7   2   0 579.424 8.66314   1 
  -9   2   0 255.177 6.85793  -2 
   8   2   0 255.177 6.85793   1 
 -10   2   0 44.3116 5.88478  -2 
   9   2   0 44.3116 5.88478   1 
   8   3   0 223.843 10.4783  -2 
 -10   3   0 223.843 10.4783   1 
  -9   3   0 12.1988 1.86583   1 
  -8   3   0 401.386 6.71312   1 
  -7   3   0 1043.31 13.4681   1 
  -6   3   0 1375.88 20.2928   1 
  -5   3   0 2119.83 24.2212   1 
  -4   3   0 1279.92 15.0786   1 
  -3   3   0 5.92904 0.59760   1 
  -2   3   0 25.6032 0.93298   1 
  -1   3   0 92.0685 1.70408   1 
   0   3   0 1021.57 14.0998   1 
   1   3   0 3190.70 34.4794   1 
   2   3   0 2704.29 29.6421   1 
   3   3   0 955.443 11.6193   1 
   4   3   0 215.626 3.86269   1 
   5   3   0 1.11621 0.57310   1 
   6   3   0 169.855 3.77941   1 
  -9   3   0 77.7497 6.34745  -2 
   7   3   0 77.7497 6.34745   1 
 -10   3   0 210.060 9.73331  -2 
   8   3   0 210.060 9.73331   1 
 -10   4   0 478.804 10.7156   1 
  -9   4   0 506.349 10.6801   1 
  -8   4   0 94.1920 2.90435   1 
  -7   4   0 163.431 3.63126   1 
  -6   4   0 78.0434 2.25597   1 
  -5   4   0 176.937 4.08949   1 
  -4   4   0 191.233 3.46879   1 
  -3   4   0 783.045 9.74795   1 
  -2   4   0 2514.44 27.8816   1 
  -1   4   0 3844.25 36.3272   1 
   0   4   0 3244.26 35.1880   1 
   1   4   0 610.716 7.79426   1 
   2   4   0 113.345 2.44138   1 
   3   4   0 116.298 2.62850   1 
   4   4   0 442.992 6.67295   1 
   5   4   0 443.292 6.98583   1 
   6   4   0 542.796 8.37827   1 
   7   4   0 338.602 6.55633   1 
   8   4   0 344.052 12.2399   1 
   7   5   0 45.4557 3.74079  -2 
 -10   5   0 45.4557 3.74079   1 
   6   5   0 9.08794 2.41782  -2 
  -9   5   0 9.08794 2.41782   1 
   5   5   0 138.249 3.73263  -2 
  -8   5   0 138.249 3.73263   1 
   4   5   0 339.024 5.98007  -2 
  -7   5   0 339.024 5.98007   1 
   3   5   0 802.696 13.8781  -2 
  -6   5   0 802.696 13.8781   1 
   2   5   0 940.637 12.1431  -2 
  -5   5   0 940.637 12.1431   1 
   1   5   0 598.141 8.23120  -2 
  -4   5   0 598.141 8.23120   1 
   0   5   0 298.783 4.73654  -2 
  -3   5   0 298.783 4.73654   1 
  -1   5   0 668.371 10.7465  -2 
  -2   5   0 668.371 10.7465   1 
  -2   5   0 988.207 14.3891  -2 
  -1   5   0 988.207 14.3891   1 
  -3   5   0 717.295 9.08922  -2 
   0   5   0 717.295 9.08922   1 
  -4   5   0 295.194 4.75326  -2 
   1   5   0 295.194 4.75326   1 
  -5   5   0 498.737 7.21974  -2 
   2   5   0 498.737 7.21974   1 
  -6   5   0 462.558 7.00694  -2 
   3   5   0 462.558 7.00694   1 
  -7   5   0 355.409 5.97000  -2 
   4   5   0 355.409 5.97000   1 
  -8   5   0 301.466 5.70043  -2 
   5   5   0 301.466 5.70043   1 
  -9   5   0 4.20683 1.55339  -2 
   6   5   0 4.20683 1.55339   1 
 -10   5   0 77.8924 6.63974  -2 
   7   5   0 77.8924 6.63974   1 
 -11   6   0 127.457 10.8377   1 
 -10   6   0 409.795 9.91603   1 
  -9   6   0 304.159 7.90880   1 
  -8   6   0 209.428 4.65788   1 
  -7   6   0 52.0780 2.18698   1 
  -6   6   0 581.072 8.65141   1 
  -5   6   0 1084.27 13.8543   1 
  -4   6   0 851.271 11.1285   1 
  -3   6   0 626.691 8.54466   1 
  -2   6   0 55.1207 1.71367   1 
  -1   6   0 252.002 4.13690   1 
   0   6   0 73.1867 2.04422   1 
   1   6   0 0.82775 0.47960   1 
   2   6   0 1.56991 0.53341   1 
   3   6   0 465.062 7.28822   1 
   4   6   0 1086.16 14.3166   1 
   5   6   0 505.918 8.21949   1 
   6   6   0 128.276 3.75647   1 
   6   7   0 202.542 9.31351  -2 
 -10   7   0 202.542 9.31351   1 
   5   7   0 233.170 7.09654  -2 
  -9   7   0 233.170 7.09654   1 
   4   7   0 515.686 8.57677  -2 
  -8   7   0 515.686 8.57677   1 
   3   7   0 891.625 12.5886  -2 
  -7   7   0 891.625 12.5886   1 
   2   7   0 693.705 10.1551  -2 
  -6   7   0 693.705 10.1551   1 
   1   7   0 1110.27 14.4446  -2 
  -5   7   0 1110.27 14.4446   1 
   0   7   0 1437.35 17.7321  -2 
  -4   7   0 1437.35 17.7321   1 
  -1   7   0 488.015 7.30273  -2 
  -3   7   0 488.015 7.30273   1 
  -2   7   0 73.5192 2.81484  -2 
  -2   7   0 73.5192 2.81484   1 
  -3   7   0 1038.37 12.9504  -2 
  -1   7   0 1038.37 12.9504   1 
  -4   7   0 2659.01 30.1936  -2 
   0   7   0 2659.01 30.1936   1 
  -5   7   0 1497.95 18.2455  -2 
   1   7   0 1497.95 18.2455   1 
  -6   7   0 977.166 15.7669  -2 
   2   7   0 977.166 15.7669   1 
  -7   7   0 453.133 7.48991  -2 
   3   7   0 453.133 7.48991   1 
  -8   7   0 208.701 4.80694  -2 
   4   7   0 208.701 4.80694   1 
  -9   7   0 152.212 4.23162  -2 
   5   7   0 152.212 4.23162   1 
 -10   7   0 339.159 11.0684  -2 
   6   7   0 339.159 11.0684   1 
 -10   8   0 136.691 10.9494   1 
  -9   8   0 24.0166 2.60754   1 
  -8   8   0 6.67197 1.18304   1 
  -7   8   0 61.8586 2.65320   1 
  -6   8   0 1.88996 0.78690   1 
  -5   8   0 150.874 3.75184   1 
  -4   8   0 103.954 2.96270   1 
  -3   8   0 262.508 6.10472   1 
  -2   8   0 669.256 11.6655   1 
  -1   8   0 140.959 4.16833   1 
   0   8   0 17.7079 1.39286   1 
   1   8   0 2.33536 0.71207   1 
   2   8   0 105.124 3.15163   1 
   3   8   0 43.2884 2.18500   1 
   4   8   0 100.599 3.38977   1 
   5   8   0 340.116 7.31494   1 
  -9   9   0 92.9634 6.97603   1 
   3   9   0 152.960 6.09911  -2 
  -8   9   0 152.960 6.09911   1 
   2   9   0 374.244 9.36131  -2 
  -7   9   0 374.244 9.36131   1 
   1   9   0 315.515 11.5225  -2 
  -6   9   0 315.515 11.5225   1 
   0   9   0 234.243 9.41245  -2 
  -5   9   0 234.243 9.41245   1 
  -1   9   0 175.277 7.95269  -2 
  -4   9   0 175.277 7.95269   1 
  -3   9   0 496.911 9.81790   1 
  -2   9   0 248.408 6.22005   1 
  -4   9   0 320.818 10.9008  -2 
  -1   9   0 320.818 10.9008   1 
  -5   9   0 260.303 9.77128  -2 
   0   9   0 260.303 9.77128   1 
  -6   9   0 160.708 7.70633  -2 
   1   9   0 160.708 7.70633   1 
  -7   9   0 172.002 7.59847  -2 
   2   9   0 172.002 7.59847   1 
  -8   9   0 38.0455 5.54158  -2 
   3   9   0 38.0455 5.54158   1 
   4   9   0 1.86174 2.09915   1 
   2  10   0 146.145 9.19530  -2 
  -8  10   0 146.145 9.19530   1 
   1  10   0 389.577 9.30566  -2 
  -7  10   0 389.577 9.30566   1 
   0  10   0 859.947 21.3506  -2 
  -6  10   0 859.947 21.3506   1 
  -1  10   0 676.880 19.0461  -2 
  -5  10   0 676.880 19.0461   1 
  -4  10   0 396.866 8.90602   1 
  -3  10   0 309.259 11.3800  -2 
  -3  10   0 309.259 11.3800   1 
  -4  10   0 233.577 6.59147  -2 
  -2  10   0 233.577 6.59147   1 
  -5  10   0 286.156 10.3357  -2 
  -1  10   0 286.156 10.3357   1 
  -6  10   0 378.467 8.90246  -2 
   0  10   0 378.467 8.90246   1 
  -7  10   0 273.583 7.53134  -2 
   1  10   0 273.583 7.53134   1 
   2  10   0 365.441 12.7721   1 
  -6  11   0 77.5593 5.52692   1 
  -5  11   0 60.1210 3.49866   1 
  -4  11   0 5.12246 1.45269   1 
  -3  11   0 0.72210 0.98360   1 
  -2  11   0 109.801 4.51476   1 
  -1  11   0 727.373 13.9461   1 
   0  11   0 583.455 21.0424   1 
   6 -11   1 132.290 4.94745  -2 
   0 -11   1 132.290 4.94745   1 
   5 -11   1 234.609 6.64721  -2 
   1 -11   1 234.609 6.64721   1 
   4 -11   1 69.9438 3.55082  -2 
   2 -11   1 69.9438 3.55082   1 
   3 -11   1 2.15524 1.96271  -2 
   3 -11   1 2.15524 1.96271   1 
   2 -11   1 58.7033 3.32561  -2 
   4 -11   1 58.7033 3.32561   1 
   1 -11   1 119.648 4.74137  -2 
   5 -11   1 119.648 4.74137   1 
   0 -11   1 93.1889 4.34193  -2 
   6 -11   1 93.1889 4.34193   1 
  -3 -10   1 424.922 7.98917   1 
  -2 -10   1 155.887 4.32510   1 
  -1 -10   1 45.3094 2.81000   1 
   0 -10   1 1.54886 1.00033   1 
   1 -10   1 38.4782 2.55747   1 
   2 -10   1 117.112 4.26081   1 
   3 -10   1 327.914 7.70571   1 
   4 -10   1 626.212 11.9582   1 
   5 -10   1 463.803 9.74639   1 
   6 -10   1 329.236 7.95359   1 
   7 -10   1 48.2407 2.56959   1 
   8 -10   1 76.8251 3.25989   1 
   9 -10   1 107.721 6.95450   1 
   9  -9   1 91.6978 3.87771  -2 
  -4  -9   1 91.6978 3.87771   1 
   8  -9   1 128.589 5.05530  -2 
  -3  -9   1 128.589 5.05530   1 
   7  -9   1 99.5443 4.31494  -2 
  -2  -9   1 99.5443 4.31494   1 
   6  -9   1 209.687 5.84061  -2 
  -1  -9   1 209.687 5.84061   1 
   5  -9   1 466.067 13.8284  -2 
   0  -9   1 466.067 13.8284   1 
   4  -9   1 1834.24 39.3438  -2 
   1  -9   1 1834.24 39.3438   1 
   3  -9   1 859.651 21.2060  -2 
   2  -9   1 859.651 21.2060   1 
   3  -9   1 119.361 4.01507   1 
   1  -9   1 890.704 22.0333  -2 
   4  -9   1 890.704 22.0333   1 
   0  -9   1 276.179 6.95013  -2 
   5  -9   1 276.179 6.95013   1 
  -1  -9   1 321.449 7.80311  -2 
   6  -9   1 321.449 7.80311   1 
  -2  -9   1 229.942 6.93419  -2 
   7  -9   1 229.942 6.93419   1 
  -3  -9   1 255.079 7.57651  -2 
   8  -9   1 255.079 7.57651   1 
  -4  -9   1 198.923 6.27798  -2 
   9  -9   1 198.923 6.27798   1 
  -6  -8   1 34.0301 5.56229   1 
   9  -8   1 68.5729 4.50892  -2 
  -5  -8   1 68.5729 4.50892   1 
   8  -8   1 55.2112 5.08608  -2 
  -4  -8   1 55.2112 5.08608   1 
  -3  -8   1 457.776 7.71501   1 
  -2  -8   1 215.558 5.58578   1 
  -1  -8   1 10.7262 1.19948   1 
   0  -8   1 10.4700 1.09841   1 
   1  -8   1 297.793 6.51266   1 
   2  -8   1 601.889 15.6292  -2 
   2  -8   1 601.889 15.6292   1 
   3  -8   1 367.526 7.48434   1 
   4  -8   1 283.191 5.22962   1 
   5  -8   1 5.78634 0.99619   1 
   6  -8   1 155.187 3.90794   1 
   7  -8   1 101.314 3.29433   1 
   8  -8   1 12.2935 1.47944   1 
  -5  -8   1 44.4438 5.24469  -2 
   9  -8   1 44.4438 5.24469   1 
  -7  -7   1 127.070 7.51955   1 
  -6  -7   1 150.702 7.47452   1 
  -5  -7   1 46.0760 2.30665   1 
  -4  -7   1 242.733 5.09261   1 
  -3  -7   1 620.319 9.19786   1 
  -2  -7   1 497.470 7.61413   1 
  -1  -7   1 643.010 10.9012   1 
   0  -7   1 444.052 6.64607   1 
   1  -7   1 0.77912 0.41887   1 
   2  -7   1 1.78822 0.50381   1 
   3  -7   1 29.4183 1.40881   1 
   4  -7   1 170.304 3.64455   1 
   5  -7   1 553.285 8.29849   1 
   6  -7   1 608.192 9.14375   1 
   7  -7   1 610.699 9.34747   1 
   8  -7   1 374.482 6.87945   1 
   9  -7   1 121.320 3.75428   1 
  10  -7   1 -2.2943 1.15877   1 
  10  -6   1 485.311 10.9992  -2 
  -7  -6   1 485.311 10.9992   1 
   9  -6   1 686.477 13.3864  -2 
  -6  -6   1 686.477 13.3864   1 
   8  -6   1 1017.23 13.7610  -2 
  -5  -6   1 1017.23 13.7610   1 
   7  -6   1 1207.35 15.4517  -2 
  -4  -6   1 1207.35 15.4517   1 
   6  -6   1 904.697 11.9508  -2 
  -3  -6   1 904.697 11.9508   1 
   5  -6   1 444.202 6.73095  -2 
  -2  -6   1 444.202 6.73095   1 
   4  -6   1 623.083 8.46985  -2 
  -1  -6   1 623.083 8.46985   1 
   3  -6   1 400.680 7.09041  -2 
   0  -6   1 400.680 7.09041   1 
   2  -6   1 2353.92 23.0217  -2 
   1  -6   1 2353.92 23.0217   1 
   1  -6   1 2298.50 26.0976  -2 
   2  -6   1 2298.50 26.0976   1 
   0  -6   1 865.747 11.0684  -2 
   3  -6   1 865.747 11.0684   1 
  -1  -6   1 1458.70 17.5977  -2 
   4  -6   1 1458.70 17.5977   1 
  -2  -6   1 794.174 10.7267  -2 
   5  -6   1 794.174 10.7267   1 
  -3  -6   1 403.576 8.47210  -2 
   6  -6   1 403.576 8.47210   1 
  -4  -6   1 818.871 11.4978  -2 
   7  -6   1 818.871 11.4978   1 
  -5  -6   1 699.276 10.4948  -2 
   8  -6   1 699.276 10.4948   1 
  -6  -6   1 592.611 12.3068  -2 
   9  -6   1 592.611 12.3068   1 
  -7  -6   1 796.496 22.6723  -2 
  10  -6   1 796.496 22.6723   1 
  -8  -5   1 108.592 4.70893   1 
  -7  -5   1 12.2512 1.96444   1 
  -6  -5   1 -1.0121 0.59245   1 
  -5  -5   1 96.5642 2.79586   1 
  -4  -5   1 65.4525 2.15103   1 
  -3  -5   1 7.53062 0.86304   1 
  -2  -5   1 335.239 5.20041   1 
  -1  -5   1 557.887 7.45078   1 
   0  -5   1 399.824 6.73550   1 
   1  -5   1 1496.40 14.8495   1 
   2  -5   1 585.767 7.62147   1 
   3  -5   1 81.6555 2.03937   1 
   4  -5   1 324.726 5.13903   1 
   5  -5   1 385.768 6.04513   1 
   6  -5   1 404.798 6.42861   1 
   7  -5   1 170.889 3.83374   1 
   8  -5   1 47.8209 2.11144   1 
   9  -5   1 55.0954 2.58528   1 
  10  -5   1 122.803 7.30271   1 
  10  -4   1 325.145 8.37702  -2 
  -8  -4   1 325.145 8.37702   1 
   9  -4   1 226.333 6.56596  -2 
  -7  -4   1 226.333 6.56596   1 
   8  -4   1 462.887 7.40508  -2 
  -6  -4   1 462.887 7.40508   1 
   7  -4   1 450.102 6.94944  -2 
  -5  -4   1 450.102 6.94944   1 
   6  -4   1 140.205 3.10205  -2 
  -4  -4   1 140.205 3.10205   1 
   5  -4   1 318.385 6.47139  -2 
  -3  -4   1 318.385 6.47139   1 
   4  -4   1 207.041 3.60457  -2 
  -2  -4   1 207.041 3.60457   1 
   3  -4   1 436.772 5.88885  -2 
  -1  -4   1 436.772 5.88885   1 
   2  -4   1 2675.03 29.2085  -2 
   0  -4   1 2675.03 29.2085   1 
   1  -4   1 7590.46 81.6063  -2 
   1  -4   1 7590.46 81.6063   1 
   0  -4   1 1211.04 17.1347  -2 
   2  -4   1 1211.04 17.1347   1 
  -1  -4   1 518.394 8.47283  -2 
   3  -4   1 518.394 8.47283   1 
  -2  -4   1 457.737 6.47769  -2 
   4  -4   1 457.737 6.47769   1 
  -3  -4   1 205.216 3.81949  -2 
   5  -4   1 205.216 3.81949   1 
  -4  -4   1 55.1178 2.03923  -2 
   6  -4   1 55.1178 2.03923   1 
  -5  -4   1 249.416 4.83034  -2 
   7  -4   1 249.416 4.83034   1 
  -6  -4   1 474.848 7.70293  -2 
   8  -4   1 474.848 7.70293   1 
  -7  -4   1 360.415 8.58842  -2 
   9  -4   1 360.415 8.58842   1 
  -8  -4   1 455.213 15.3749  -2 
  10  -4   1 455.213 15.3749   1 
  -9  -3   1 457.638 10.2392   1 
  -8  -3   1 276.843 7.15627   1 
  -7  -3   1 207.961 5.72310   1 
  -6  -3   1 73.6303 2.30643   1 
  -5  -3   1 606.537 8.39353   1 
  -4  -3   1 3245.27 35.8005   1 
  -3  -3   1 3037.19 33.3520   1 
  -2  -3   1 631.441 7.83895   1 
  -1  -3   1 473.452 7.23750   1 
   0  -3   1 822.915 9.46786   1 
   1  -3   1 365.885 4.66669   1 
   2  -3   1 1650.16 18.4484   1 
   3  -3   1 679.620 8.42032   1 
   4  -3   1 475.364 6.45917   1 
   5  -3   1 1623.51 18.9746   1 
   6  -3   1 2391.24 27.4469   1 
   7  -3   1 371.096 6.11587   1 
   8  -3   1 16.7235 1.41903   1 
   9  -3   1 9.12959 1.65977   1 
  10  -3   1 299.875 11.4050   1 
  11  -3   1 282.602 12.2983   1 
  10  -2   1 197.217 9.55740  -2 
  -9  -2   1 197.217 9.55740   1 
   9  -2   1 412.572 9.28539  -2 
  -8  -2   1 412.572 9.28539   1 
   8  -2   1 510.918 14.5703  -2 
  -7  -2   1 510.918 14.5703   1 
  -6  -2   1 664.120 9.10783   1 
  -5  -2   1 236.073 3.50161   1 
  -4  -2   1 742.753 8.09743   1 
  -3  -2   1 1267.89 12.6674   1 
  -2  -2   1 416.476 5.29014   1 
  -1  -2   1 59.7865 1.19786   1 
   0  -2   1 122.042 1.51126   1 
   1  -2   1 6072.37 66.6077   1 
   2  -2   1 2954.68 32.3319   1 
   3  -2   1 2794.78 30.6104   1 
   4  -2   1 590.797 6.49638   1 
   5  -2   1 29.6460 1.05792   1 
   6  -2   1 118.742 2.34862   1 
  -6  -2   1 1151.19 23.9808  -2 
   7  -2   1 1151.19 23.9808   1 
  -7  -2   1 676.201 11.9435  -2 
   8  -2   1 676.201 11.9435   1 
   9  -2   1 272.390 10.1719   1 
  10  -2   1 325.606 11.9095   1 
   9  -1   1 25.7853 3.26697  -2 
  -9  -1   1 25.7853 3.26697   1 
   8  -1   1 0.09414 3.76376  -2 
  -8  -1   1 0.09414 3.76376   1 
   7  -1   1 18.3301 1.92160  -2 
  -7  -1   1 18.3301 1.92160   1 
   6  -1   1 505.078 6.34462  -2 
  -6  -1   1 505.078 6.34462   1 
   5  -1   1 885.899 9.63850  -2 
  -5  -1   1 885.899 9.63850   1 
   4  -1   1 1169.70 16.3520  -2 
  -4  -1   1 1169.70 16.3520   1 
   3  -1   1 1374.82 27.3392  -2 
  -3  -1   1 1374.82 27.3392   1 
  -2  -1   1 12.5991 0.49733   1 
  -1  -1   1 1841.27 17.3370   1 
   0  -1   1 10.3290 0.26447   1 
   1  -1   1 638.597 6.19190   1 
   2  -1   1 1.44800 0.25582   1 
  -3  -1   1 2710.86 37.4420  -2 
   3  -1   1 2710.86 37.4420   1 
  -4  -1   1 1235.90 18.3316  -2 
   4  -1   1 1235.90 18.3316   1 
  -5  -1   1 428.612 5.37206  -2 
   5  -1   1 428.612 5.37206   1 
  -6  -1   1 359.931 4.95017  -2 
   6  -1   1 359.931 4.95017   1 
  -7  -1   1 16.3456 1.43124  -2 
   7  -1   1 16.3456 1.43124   1 
  -8  -1   1 7.40018 1.67371  -2 
   8  -1   1 7.40018 1.67371   1 
 -10   0   1 177.321 8.22541   1 
  -9   0   1 614.950 17.0854   1 
  -8   0   1 816.102 11.5452   1 
  -7   0   1 145.613 2.83538   1 
  -6   0   1 332.508 4.56487   1 
  -5   0   1 744.490 8.22983   1 
  -4   0   1 38.6746 1.07967   1 
  -3   0   1 752.633 7.74225   1 
  -2   0   1 2045.70 19.3248   1 
  -1   0   1 2961.48 40.5176   1 
   0   0   1 4037.45 43.9832   1 
   1   0   1 2439.93 26.7080   1 
   2   0   1 120.850 1.68934   1 
   3   0   1 29.0037 0.87438   1 
   4   0   1 131.689 2.20371   1 
   5   0   1 287.168 3.97834   1 
   6   0   1 346.864 4.81961   1 
   7   0   1 353.671 5.12281   1 
   8   0   1 749.131 10.5617   1 
   9   1   1 376.439 12.3002  -2 
 -10   1   1 376.439 12.3002   1 
   8   1   1 265.264 6.86774  -2 
  -9   1   1 265.264 6.86774   1 
   7   1   1 234.597 6.05726  -2 
  -8   1   1 234.597 6.05726   1 
   6   1   1 259.749 4.01035  -2 
  -7   1   1 259.749 4.01035   1 
   5   1   1 1971.40 19.8121  -2 
  -6   1   1 1971.40 19.8121   1 
   4   1   1 2511.33 24.4949  -2 
  -5   1   1 2511.33 24.4949   1 
   3   1   1 3083.29 29.4558  -2 
  -4   1   1 3083.29 29.4558   1 
   2   1   1 6402.37 60.1135  -2 
  -3   1   1 6402.37 60.1135   1 
   1   1   1 3585.49 33.8046  -2 
  -2   1   1 3585.49 33.8046   1 
   0   1   1 291.750 3.08357  -2 
  -1   1   1 291.750 3.08357   1 
  -1   1   1 658.220 6.47848  -2 
   0   1   1 658.220 6.47848   1 
  -2   1   1 2258.15 21.3968  -2 
   1   1   1 2258.15 21.3968   1 
  -3   1   1 3308.25 31.2439  -2 
   2   1   1 3308.25 31.2439   1 
  -4   1   1 2159.79 20.9252  -2 
   3   1   1 2159.79 20.9252   1 
  -5   1   1 2377.71 23.2217  -2 
   4   1   1 2377.71 23.2217   1 
  -6   1   1 2571.51 25.3168  -2 
   5   1   1 2571.51 25.3168   1 
  -7   1   1 523.370 6.59531  -2 
   6   1   1 523.370 6.59531   1 
  -8   1   1 135.884 3.32665  -2 
   7   1   1 135.884 3.32665   1 
  -9   1   1 175.691 4.93437  -2 
   8   1   1 175.691 4.93437   1 
 -10   1   1 403.128 12.9906  -2 
   9   1   1 403.128 12.9906   1 
 -11   2   1 5.28456 1.79187   1 
 -10   2   1 74.1629 3.81613   1 
  -9   2   1 558.654 11.3669   1 
  -8   2   1 310.149 7.30302   1 
  -7   2   1 49.0225 1.87313   1 
  -6   2   1 128.015 2.86118   1 
  -5   2   1 192.006 3.41100   1 
  -4   2   1 472.076 6.28845   1 
  -3   2   1 46.1805 1.26021   1 
  -2   2   1 8.95567 0.58217   1 
  -1   2   1 3.54094 0.31712   1 
   0   2   1 2345.90 30.7263   1 
   1   2   1 1602.24 17.6985   1 
   2   2   1 1194.62 13.6970   1 
   3   2   1 396.280 5.54359   1 
   4   2   1 228.740 3.96346   1 
   5   2   1 436.620 6.55953   1 
   6   2   1 233.576 4.49551   1 
   7   2   1 268.140 5.18255   1 
   8   2   1 33.7399 2.62813   1 
   9   2   1 5.95505 2.49491   1 
   9   3   1 259.484 10.9871  -2 
 -11   3   1 259.484 10.9871   1 
   8   3   1 9.41147 3.07283  -2 
 -10   3   1 9.41147 3.07283   1 
   7   3   1 83.4564 4.31208  -2 
  -9   3   1 83.4564 4.31208   1 
   6   3   1 116.221 4.53979  -2 
  -8   3   1 116.221 4.53979   1 
   5   3   1 626.675 9.00161  -2 
  -7   3   1 626.675 9.00161   1 
   4   3   1 1089.96 13.6451  -2 
  -6   3   1 1089.96 13.6451   1 
   3   3   1 660.057 16.6482  -2 
  -5   3   1 660.057 16.6482   1 
   2   3   1 1410.15 30.5705  -2 
  -4   3   1 1410.15 30.5705   1 
   1   3   1 2138.28 43.9423  -2 
  -3   3   1 2138.28 43.9423   1 
   0   3   1 1201.63 25.2314  -2 
  -2   3   1 1201.63 25.2314   1 
  -1   3   1 28.1478 1.69503  -2 
  -1   3   1 28.1478 1.69503   1 
  -2   3   1 2626.43 50.7855  -2 
   0   3   1 2626.43 50.7855   1 
  -3   3   1 3406.51 65.9832  -2 
   1   3   1 3406.51 65.9832   1 
  -4   3   1 1252.87 14.6106  -2 
   2   3   1 1252.87 14.6106   1 
  -5   3   1 1171.84 14.0641  -2 
   3   3   1 1171.84 14.0641   1 
  -6   3   1 618.732 8.48575  -2 
   4   3   1 618.732 8.48575   1 
  -7   3   1 278.786 5.02588  -2 
   5   3   1 278.786 5.02588   1 
  -8   3   1 82.4046 2.82726  -2 
   6   3   1 82.4046 2.82726   1 
  -9   3   1 113.008 4.23649  -2 
   7   3   1 113.008 4.23649   1 
 -10   3   1 17.4409 4.88421  -2 
   8   3   1 17.4409 4.88421   1 
 -11   4   1 258.574 10.8488   1 
 -10   4   1 664.395 13.4796   1 
  -9   4   1 611.756 12.3428   1 
  -8   4   1 188.609 5.50940   1 
  -7   4   1 641.780 9.20998   1 
  -6   4   1 468.554 7.02429   1 
  -5   4   1 199.677 3.76881   1 
  -4   4   1 818.179 10.3944   1 
  -3   4   1 690.268 8.83506   1 
  -2   4   1 2043.59 23.0093   1 
  -1   4   1 3532.27 33.4931   1 
   0   4   1 797.452 9.72092   1 
   1   4   1 4.14178 0.58890   1 
   2   4   1 301.733 4.77445   1 
   3   4   1 324.880 5.21008   1 
   4   4   1 100.110 2.69384   1 
   5   4   1 454.110 7.22160   1 
   6   4   1 972.394 13.2164   1 
   7   4   1 477.340 9.85548   1 
   8   4   1 208.019 9.50364   1 
 -11   5   1 26.9069 4.55219   1 
 -10   5   1 50.5387 3.52030   1 
  -9   5   1 1.82280 1.13246   1 
  -8   5   1 5.39128 1.24517   1 
  -7   5   1 137.935 3.95227   1 
  -6   5   1 684.487 9.64598   1 
  -5   5   1 1111.06 14.0112   1 
  -4   5   1 1942.53 22.6095   1 
  -3   5   1 50.2766 1.66276   1 
  -2   5   1 5.75304 0.67491   1 
  -1   5   1 157.193 2.46120   1 
   0   5   1 369.150 5.41909   1 
   1   5   1 265.106 4.42514   1 
   2   5   1 330.118 5.37381   1 
   3   5   1 1121.79 14.1854   1 
   4   5   1 562.458 8.47756   1 
   5   5   1 149.176 3.72774   1 
   6   5   1 6.94493 1.40766   1 
   7   5   1 198.119 5.99019   1 
   6   6   1 340.240 9.21812  -2 
 -10   6   1 340.240 9.21812   1 
   5   6   1 391.144 9.58541  -2 
  -9   6   1 391.144 9.58541   1 
   4   6   1 225.304 6.66406  -2 
  -8   6   1 225.304 6.66406   1 
   3   6   1 250.876 5.18951  -2 
  -7   6   1 250.876 5.18951   1 
   2   6   1 512.600 8.01618  -2 
  -6   6   1 512.600 8.01618   1 
   1   6   1 756.745 10.4511  -2 
  -5   6   1 756.745 10.4511   1 
   0   6   1 787.467 10.6034  -2 
  -4   6   1 787.467 10.6034   1 
  -1   6   1 231.490 5.35404  -2 
  -3   6   1 231.490 5.35404   1 
  -2   6   1 107.737 2.15176  -2 
  -2   6   1 107.737 2.15176   1 
  -3   6   1 269.125 4.49995  -2 
  -1   6   1 269.125 4.49995   1 
  -4   6   1 456.813 6.73879  -2 
   0   6   1 456.813 6.73879   1 
  -5   6   1 399.705 6.31254  -2 
   1   6   1 399.705 6.31254   1 
  -6   6   1 266.295 6.10991  -2 
   2   6   1 266.295 6.10991   1 
  -7   6   1 443.551 7.26281  -2 
   3   6   1 443.551 7.26281   1 
  -8   6   1 293.849 5.76768  -2 
   4   6   1 293.849 5.76768   1 
  -9   6   1 398.286 7.25535  -2 
   5   6   1 398.286 7.25535   1 
 -10   6   1 202.159 6.28879  -2 
   6   6   1 202.159 6.28879   1 
 -10   7   1 77.3738 5.79983   1 
  -9   7   1 553.733 12.0224   1 
  -8   7   1 296.573 7.79338   1 
  -7   7   1 284.521 5.68394   1 
  -6   7   1 461.162 7.56442   1 
  -5   7   1 183.045 4.02461   1 
  -4   7   1 185.394 3.96440   1 
  -3   7   1 16.2922 1.23298   1 
  -2   7   1 307.019 6.44886   1 
  -1   7   1 932.010 11.9838   1 
   0   7   1 1636.32 19.5877   1 
   1   7   1 1191.93 15.1495   1 
   2   7   1 343.212 6.08621   1 
   3   7   1 19.8741 1.60309   1 
   4   7   1 27.1914 1.92812   1 
   5   7   1 38.7103 2.82459   1 
   6   7   1 7.24187 2.76277   1 
   4   8   1 295.680 8.38348  -2 
  -9   8   1 295.680 8.38348   1 
   3   8   1 205.966 5.05377  -2 
  -8   8   1 205.966 5.05377   1 
   2   8   1 179.773 4.49868  -2 
  -7   8   1 179.773 4.49868   1 
   1   8   1 41.3517 2.19282  -2 
  -6   8   1 41.3517 2.19282   1 
   0   8   1 250.172 5.12550  -2 
  -5   8   1 250.172 5.12550   1 
  -1   8   1 960.959 15.7683  -2 
  -4   8   1 960.959 15.7683   1 
  -2   8   1 1327.13 20.4057  -2 
  -3   8   1 1327.13 20.4057   1 
  -3   8   1 1095.65 17.4295  -2 
  -2   8   1 1095.65 17.4295   1 
  -4   8   1 584.883 10.7305  -2 
  -1   8   1 584.883 10.7305   1 
  -5   8   1 123.380 3.24004  -2 
   0   8   1 123.380 3.24004   1 
  -6   8   1 88.3905 2.85457  -2 
   1   8   1 88.3905 2.85457   1 
  -7   8   1 110.352 3.32050  -2 
   2   8   1 110.352 3.32050   1 
  -8   8   1 202.351 4.81456  -2 
   3   8   1 202.351 4.81456   1 
  -9   8   1 486.080 10.4878  -2 
   4   8   1 486.080 10.4878   1 
  -8   9   1 182.744 4.89992   1 
  -7   9   1 261.916 5.79622   1 
  -6   9   1 68.5637 2.84245   1 
  -5   9   1 15.8544 1.95168   1 
  -4   9   1 1.91459 1.04821   1 
  -3   9   1 147.074 4.73688   1 
  -2   9   1 3.92290 1.18397   1 
  -1   9   1 5.03192 1.21471   1 
   0   9   1 104.670 4.01807   1 
   1   9   1 52.6373 2.44094   1 
   2   9   1 156.882 4.27507   1 
   3   9   1 121.082 3.96717   1 
   1  10   1 416.203 13.2845  -2 
  -7  10   1 416.203 13.2845   1 
   0  10   1 690.071 13.4099  -2 
  -6  10   1 690.071 13.4099   1 
  -1  10   1 355.375 8.71578  -2 
  -5  10   1 355.375 8.71578   1 
  -2  10   1 231.807 6.79610  -2 
  -4  10   1 231.807 6.79610   1 
  -3  10   1 101.177 4.59766  -2 
  -3  10   1 101.177 4.59766   1 
  -4  10   1 167.629 5.71524  -2 
  -2  10   1 167.629 5.71524   1 
  -5  10   1 153.121 5.53007  -2 
  -1  10   1 153.121 5.53007   1 
  -6  10   1 354.954 8.71068  -2 
   0  10   1 354.954 8.71068   1 
  -7  10   1 259.629 10.8315  -2 
   1  10   1 259.629 10.8315   1 
  -5  11   1 30.8626 5.18756   1 
  -4  11   1 -3.1256 1.50004   1 
  -3  11   1 36.7414 3.78029   1 
  -2 -11   2 15.7124 2.76410   1 
  -1 -11   2 97.0027 4.20755   1 
   0 -11   2 34.2167 2.58459   1 
   1 -11   2 4.82972 1.40067   1 
   2 -11   2 62.8199 3.26327   1 
   3 -11   2 194.243 5.84745   1 
   4 -11   2 124.409 4.62512   1 
   5 -11   2 3.39069 1.20020   1 
   6 -11   2 48.7210 3.16118   1 
   7 -11   2 99.3931 4.40177   1 
   8 -11   2 168.935 9.07067   1 
   8 -10   2 147.546 4.24769  -2 
  -3 -10   2 147.546 4.24769   1 
   7 -10   2 82.9910 3.04460  -2 
  -2 -10   2 82.9910 3.04460   1 
   6 -10   2 75.8610 3.46567  -2 
  -1 -10   2 75.8610 3.46567   1 
   5 -10   2 357.423 8.08526  -2 
   0 -10   2 357.423 8.08526   1 
   4 -10   2 248.801 6.36809  -2 
   1 -10   2 248.801 6.36809   1 
   3 -10   2 424.083 8.93300  -2 
   2 -10   2 424.083 8.93300   1 
   2 -10   2 376.775 8.29325  -2 
   3 -10   2 376.775 8.29325   1 
   1 -10   2 565.368 10.9634  -2 
   4 -10   2 565.368 10.9634   1 
   0 -10   2 738.205 13.4471  -2 
   5 -10   2 738.205 13.4471   1 
  -1 -10   2 91.6169 3.20517  -2 
   6 -10   2 91.6169 3.20517   1 
  -2 -10   2 40.1390 2.38772  -2 
   7 -10   2 40.1390 2.38772   1 
  -3 -10   2 166.230 4.64071  -2 
   8 -10   2 166.230 4.64071   1 
  -5  -9   2 54.8992 5.61265   1 
  -4  -9   2 75.3065 2.99816   1 
  -3  -9   2 3.75109 1.02820   1 
  -2  -9   2 228.317 5.97270   1 
  -1  -9   2 357.157 6.31585   1 
   0  -9   2 1058.75 14.1856   1 
   1  -9   2 1541.15 23.1032   1 
   2  -9   2 432.099 8.64234   1 
   3  -9   2 2.06741 0.88330   1 
   4  -9   2 72.8551 2.52249   1 
   5  -9   2 111.141 3.24191   1 
   6  -9   2 157.693 4.09299   1 
   7  -9   2 337.238 6.64665   1 
   8  -9   2 297.042 6.24977   1 
   9  -9   2 300.816 6.52865   1 
   9  -8   2 112.833 5.29096  -2 
  -5  -8   2 112.833 5.29096   1 
   8  -8   2 327.872 6.49813  -2 
  -4  -8   2 327.872 6.49813   1 
   7  -8   2 668.274 10.0536  -2 
  -3  -8   2 668.274 10.0536   1 
   6  -8   2 1073.19 14.1683  -2 
  -2  -8   2 1073.19 14.1683   1 
   5  -8   2 297.542 6.59569  -2 
  -1  -8   2 297.542 6.59569   1 
   4  -8   2 176.589 6.60151  -2 
   0  -8   2 176.589 6.60151   1 
   3  -8   2 171.386 6.79720  -2 
   1  -8   2 171.386 6.79720   1 
   2  -8   2 232.166 8.08084  -2 
   2  -8   2 232.166 8.08084   1 
   1  -8   2 173.349 6.28530  -2 
   3  -8   2 173.349 6.28530   1 
   0  -8   2 280.470 9.23841  -2 
   4  -8   2 280.470 9.23841   1 
  -1  -8   2 557.071 8.58288  -2 
   5  -8   2 557.071 8.58288   1 
  -2  -8   2 1041.46 14.0818  -2 
   6  -8   2 1041.46 14.0818   1 
  -3  -8   2 486.005 10.3374  -2 
   7  -8   2 486.005 10.3374   1 
  -4  -8   2 145.694 4.27842  -2 
   8  -8   2 145.694 4.27842   1 
  -5  -8   2 96.9220 3.85014  -2 
   9  -8   2 96.9220 3.85014   1 
  -7  -7   2 125.815 7.11551   1 
  -6  -7   2 116.313 4.68078   1 
  -5  -7   2 5.22545 1.01080   1 
  -4  -7   2 636.555 9.44396   1 
  -3  -7   2 935.590 12.4777   1 
  -2  -7   2 208.248 4.15492   1 
  -1  -7   2 113.067 2.80765   1 
   0  -7   2 248.092 4.35105   1 
   1  -7   2 179.102 3.39443   1 
   2  -7   2 21.8616 1.13293   1 
   3  -7   2 14.0654 1.05002   1 
   4  -7   2 69.0378 2.18718   1 
   5  -7   2 625.095 9.00644   1 
   6  -7   2 750.611 10.6431   1 
   7  -7   2 436.376 7.31857   1 
   8  -7   2 66.3985 2.64778   1 
   9  -7   2 1.98500 0.92816   1 
  10  -7   2 41.1785 6.76139   1 
  -8  -6   2 120.862 7.30607   1 
  -7  -6   2 412.529 9.64907   1 
  -6  -6   2 466.265 10.0425   1 
  -5  -6   2 636.173 9.41604   1 
  -4  -6   2 304.167 5.44075   1 
  -3  -6   2 306.137 5.22257   1 
  -2  -6   2 40.6665 1.57708   1 
  -1  -6   2 115.954 2.61338   1 
   0  -6   2 56.7164 1.69645   1 
   1  -6   2 1104.72 11.4503   1 
   2  -6   2 4274.46 46.8602   1 
   3  -6   2 756.799 9.83022   1 
   4  -6   2 839.791 10.8977   1 
   5  -6   2 312.314 5.34318   1 
   6  -6   2 51.1036 1.98691   1 
   7  -6   2 132.484 3.39624   1 
   8  -6   2 232.898 4.95475   1 
   9  -6   2 270.215 7.12364   1 
  10  -6   2 451.471 15.5173   1 
  10  -5   2 252.952 7.55023  -2 
  -8  -5   2 252.952 7.55023   1 
   9  -5   2 165.943 5.75516  -2 
  -7  -5   2 165.943 5.75516   1 
   8  -5   2 344.026 8.17701  -2 
  -6  -5   2 344.026 8.17701   1 
   7  -5   2 689.844 9.82832  -2 
  -5  -5   2 689.844 9.82832   1 
   6  -5   2 180.560 3.80236  -2 
  -4  -5   2 180.560 3.80236   1 
   5  -5   2 380.568 5.85757  -2 
  -3  -5   2 380.568 5.85757   1 
   4  -5   2 2565.90 28.7201  -2 
  -2  -5   2 2565.90 28.7201   1 
   3  -5   2 2252.93 25.2061  -2 
  -1  -5   2 2252.93 25.2061   1 
   2  -5   2 2304.63 25.5908  -2 
   0  -5   2 2304.63 25.5908   1 
   1  -5   2 239.823 4.47121  -2 
   1  -5   2 239.823 4.47121   1 
   0  -5   2 1033.51 22.2972  -2 
   2  -5   2 1033.51 22.2972   1 
  -1  -5   2 999.466 12.1935  -2 
   3  -5   2 999.466 12.1935   1 
  -2  -5   2 2108.04 24.2213  -2 
   4  -5   2 2108.04 24.2213   1 
  -3  -5   2 349.128 5.62991  -2 
   5  -5   2 349.128 5.62991   1 
  -4  -5   2 419.530 6.66420  -2 
   6  -5   2 419.530 6.66420   1 
  -5  -5   2 1485.17 18.4161  -2 
   7  -5   2 1485.17 18.4161   1 
  -6  -5   2 378.081 6.76761  -2 
   8  -5   2 378.081 6.76761   1 
  -7  -5   2 159.884 5.42037  -2 
   9  -5   2 159.884 5.42037   1 
  -8  -5   2 165.046 9.15173  -2 
  10  -5   2 165.046 9.15173   1 
  -9  -4   2 28.7087 2.96873   1 
  -8  -4   2 112.765 4.59684   1 
  -7  -4   2 74.8001 3.56342   1 
  -6  -4   2 57.6073 2.96806   1 
  -5  -4   2 608.407 8.54331   1 
  -4  -4   2 504.520 7.14799   1 
  -3  -4   2 34.0732 1.30430   1 
  -2  -4   2 43.3097 1.35810   1 
  -1  -4   2 167.215 2.81276   1 
   0  -4   2 245.737 3.54779   1 
   1  -4   2 632.985 7.73281   1 
   2  -4   2 142.506 2.51619   1 
   3  -4   2 81.1923 1.89367   1 
   4  -4   2 351.990 6.18038   1 
   5  -4   2 98.0398 2.42224   1 
   6  -4   2 1.62947 0.59322   1 
   7  -4   2 14.0650 1.25083   1 
   8  -4   2 124.651 3.38883   1 
   9  -4   2 432.110 9.24837   1 
  10  -4   2 228.477 10.0246   1 
  10  -3   2 626.990 12.8023  -2 
  -9  -3   2 626.990 12.8023   1 
   9  -3   2 309.645 7.75684  -2 
  -8  -3   2 309.645 7.75684   1 
   8  -3   2 204.185 5.84584  -2 
  -7  -3   2 204.185 5.84584   1 
   7  -3   2 203.796 5.48876  -2 
  -6  -3   2 203.796 5.48876   1 
   6  -3   2 2216.22 25.3319  -2 
  -5  -3   2 2216.22 25.3319   1 
   5  -3   2 2213.22 21.7929  -2 
  -4  -3   2 2213.22 21.7929   1 
   4  -3   2 4083.32 38.7198  -2 
  -3  -3   2 4083.32 38.7198   1 
   3  -3   2 2033.57 19.6384  -2 
  -2  -3   2 2033.57 19.6384   1 
   2  -3   2 38.8581 1.11532  -2 
  -1  -3   2 38.8581 1.11532   1 
   1  -3   2 458.227 9.89677  -2 
   0  -3   2 458.227 9.89677   1 
   0  -3   2 294.717 4.74878  -2 
   1  -3   2 294.717 4.74878   1 
  -1  -3   2 27.4579 1.30253  -2 
   2  -3   2 27.4579 1.30253   1 
  -2  -3   2 1204.72 13.9705  -2 
   3  -3   2 1204.72 13.9705   1 
  -3  -3   2 3842.92 42.1537  -2 
   4  -3   2 3842.92 42.1537   1 
  -4  -3   2 2617.96 29.5264  -2 
   5  -3   2 2617.96 29.5264   1 
  -5  -3   2 1884.10 22.1302  -2 
   6  -3   2 1884.10 22.1302   1 
  -6  -3   2 177.009 3.88145  -2 
   7  -3   2 177.009 3.88145   1 
  -7  -3   2 220.245 5.89920  -2 
   8  -3   2 220.245 5.89920   1 
  -8  -3   2 212.868 5.98835  -2 
   9  -3   2 212.868 5.98835   1 
  -9  -3   2 495.128 16.1581  -2 
  10  -3   2 495.128 16.1581   1 
 -10  -2   2 -1.0645 1.75014   1 
  -9  -2   2 135.637 4.89935   1 
  -8  -2   2 748.167 13.6143   1 
  -7  -2   2 815.548 14.1425   1 
  -6  -2   2 495.181 6.45213   1 
  -5  -2   2 462.351 5.66964   1 
  -4  -2   2 11.6523 0.67969   1 
  -3  -2   2 6.32524 0.47741   1 
  -2  -2   2 134.923 1.84649   1 
  -1  -2   2 908.399 8.87616   1 
   0  -2   2 9285.39 87.7461   1 
   1  -2   2 6383.08 60.5173   1 
   2  -2   2 2058.84 19.5826   1 
   3  -2   2 925.550 9.39727   1 
   4  -2   2 31.8702 0.99459   1 
   5  -2   2 28.5791 1.07627   1 
   6  -2   2 254.220 3.84487   1 
   7  -2   2 306.414 4.58862   1 
   8  -2   2 248.813 6.16034   1 
   9  -2   2 392.618 8.55709   1 
  10  -1   2 111.707 7.51224  -2 
 -10  -1   2 111.707 7.51224   1 
   9  -1   2 69.8423 5.78607  -2 
  -9  -1   2 69.8423 5.78607   1 
   8  -1   2 22.4990 3.06586  -2 
  -8  -1   2 22.4990 3.06586   1 
   7  -1   2 180.189 5.34513  -2 
  -7  -1   2 180.189 5.34513   1 
   6  -1   2 541.063 14.1589  -2 
  -6  -1   2 541.063 14.1589   1 
  -5  -1   2 3.02507 0.54465   1 
  -4  -1   2 257.611 3.37113   1 
  -3  -1   2 2124.03 20.3647   1 
  -2  -1   2 2320.84 25.9928   1 
   1  -1   2 352.827 7.66234  -2 
  -1  -1   2 352.827 7.66234   1 
   0  -1   2 626.178 6.10114   1 
   1  -1   2 243.903 3.98023   1 
   2  -1   2 1327.03 14.9928   1 
   3  -1   2 353.877 4.15474   1 
   4  -1   2 798.568 8.59391   1 
  -5  -1   2 663.464 14.7449  -2 
   5  -1   2 663.464 14.7449   1 
  -6  -1   2 906.214 19.5584  -2 
   6  -1   2 906.214 19.5584   1 
  -7  -1   2 365.664 7.83483  -2 
   7  -1   2 365.664 7.83483   1 
  -8  -1   2 64.3260 5.36103  -2 
   8  -1   2 64.3260 5.36103   1 
   9  -1   2 7.19771 1.88715   1 
   9   0   2 217.031 9.75949  -2 
 -10   0   2 217.031 9.75949   1 
   8   0   2 421.709 9.46980  -2 
  -9   0   2 421.709 9.46980   1 
   7   0   2 701.040 10.4301  -2 
  -8   0   2 701.040 10.4301   1 
   6   0   2 1013.07 13.5591  -2 
  -7   0   2 1013.07 13.5591   1 
   5   0   2 1122.78 14.3947  -2 
  -6   0   2 1122.78 14.3947   1 
   4   0   2 16.3330 1.02956  -2 
  -5   0   2 16.3330 1.02956   1 
  -4   0   2 458.744 6.33497   1 
  -3   0   2 377.968 6.44566   1 
  -2   0   2 1300.68 14.9053   1 
  -1   0   2 1495.82 14.1421   1 
   0   0   2 788.974 8.88327   1 
   1   0   2 321.442 4.07808   1 
   2   0   2 42.0892 1.12926   1 
  -4   0   2 225.953 6.44694  -2 
   3   0   2 225.953 6.44694   1 
   4   0   2 17.9538 0.86073   1 
  -6   0   2 814.986 12.9307  -2 
   5   0   2 814.986 12.9307   1 
  -7   0   2 1006.41 11.2090  -2 
   6   0   2 1006.41 11.2090   1 
  -8   0   2 706.637 12.1428  -2 
   7   0   2 706.637 12.1428   1 
  -9   0   2 420.458 8.74527  -2 
   8   0   2 420.458 8.74527   1 
 -11   1   2 291.456 11.5353   1 
 -10   1   2 565.684 11.9209   1 
  -9   1   2 154.678 5.11676   1 
  -8   1   2 18.8034 1.96247   1 
  -7   1   2 7.90966 0.99636   1 
  -6   1   2 1066.07 11.4196   1 
  -5   1   2 3808.46 36.3583   1 
  -4   1   2 1873.20 18.2707   1 
  -3   1   2 1843.66 17.7569   1 
  -2   1   2 2.55705 0.28597   1 
  -1   1   2 621.971 6.25688   1 
   0   1   2 1291.30 12.4068   1 
   1   1   2 2460.07 23.2506   1 
   2   1   2 1105.86 11.0214   1 
   3   1   2 1172.23 11.9063   1 
   4   1   2 1997.89 19.8106   1 
   5   1   2 709.955 8.19836   1 
   6   1   2 376.013 6.06940   1 
   7   1   2 32.2697 2.20042   1 
   8   1   2 431.904 8.96841   1 
   9   1   2 269.455 10.1224   1 
   9   2   2 99.9730 7.22580  -2 
 -11   2   2 99.9730 7.22580   1 
   8   2   2 180.846 6.06178  -2 
 -10   2   2 180.846 6.06178   1 
   7   2   2 771.231 14.5041  -2 
  -9   2   2 771.231 14.5041   1 
   6   2   2 886.691 15.6813  -2 
  -8   2   2 886.691 15.6813   1 
   5   2   2 263.205 6.43877  -2 
  -7   2   2 263.205 6.43877   1 
   4   2   2 299.093 4.14163  -2 
  -6   2   2 299.093 4.14163   1 
   3   2   2 360.877 5.33697  -2 
  -5   2   2 360.877 5.33697   1 
   2   2   2 456.556 5.23027  -2 
  -4   2   2 456.556 5.23027   1 
   1   2   2 1237.36 12.3003  -2 
  -3   2   2 1237.36 12.3003   1 
   0   2   2 2865.20 27.1718  -2 
  -2   2   2 2865.20 27.1718   1 
  -1   2   2 4128.38 38.7372  -2 
  -1   2   2 4128.38 38.7372   1 
  -2   2   2 5752.26 53.7677  -2 
   0   2   2 5752.26 53.7677   1 
  -3   2   2 1470.79 14.4018  -2 
   1   2   2 1470.79 14.4018   1 
  -4   2   2 911.951 10.8788  -2 
   2   2   2 911.951 10.8788   1 
  -5   2   2 160.139 2.49927  -2 
   3   2   2 160.139 2.49927   1 
  -6   2   2 622.514 8.41389  -2 
   4   2   2 622.514 8.41389   1 
  -7   2   2 306.155 5.22601  -2 
   5   2   2 306.155 5.22601   1 
  -8   2   2 698.621 12.2072  -2 
   6   2   2 698.621 12.2072   1 
  -9   2   2 476.637 9.57581  -2 
   7   2   2 476.637 9.57581   1 
 -10   2   2 175.582 5.45110  -2 
   8   2   2 175.582 5.45110   1 
 -11   3   2 15.0580 2.49676   1 
 -10   3   2 38.6572 3.22498   1 
  -9   3   2 109.653 4.42236   1 
  -8   3   2 115.963 4.29585   1 
  -7   3   2 7.29210 1.34153   1 
  -6   3   2 252.944 4.42615   1 
  -5   3   2 227.052 3.97927   1 
  -4   3   2 286.805 5.24235   1 
  -3   3   2 1040.24 12.3907   1 
  -2   3   2 26.2497 0.82134   1 
  -1   3   2 281.395 3.44917   1 
   0   3   2 39.3520 0.98600   1 
   1   3   2 1172.27 13.6496   1 
   2   3   2 583.626 7.67745   1 
   3   3   2 17.0427 1.07229   1 
   4   3   2 75.3677 2.22150   1 
   5   3   2 169.093 3.73380   1 
   6   3   2 49.4216 2.71759   1 
   7   3   2 0.85654 1.07089   1 
   8   3   2 13.4329 1.92870   1 
   7   4   2 658.567 13.8187  -2 
 -10   4   2 658.567 13.8187   1 
   6   4   2 999.807 18.0203  -2 
  -9   4   2 999.807 18.0203   1 
   5   4   2 807.251 14.9386  -2 
  -8   4   2 807.251 14.9386   1 
   4   4   2 1077.93 18.2001  -2 
  -7   4   2 1077.93 18.2001   1 
   3   4   2 174.486 3.79157  -2 
  -6   4   2 174.486 3.79157   1 
   2   4   2 536.789 7.68216  -2 
  -5   4   2 536.789 7.68216   1 
   1   4   2 1462.79 17.3905  -2 
  -4   4   2 1462.79 17.3905   1 
   0   4   2 2233.59 30.8505  -2 
  -3   4   2 2233.59 30.8505   1 
  -1   4   2 1869.61 26.8462  -2 
  -2   4   2 1869.61 26.8462   1 
  -2   4   2 1586.05 18.1401  -2 
  -1   4   2 1586.05 18.1401   1 
  -3   4   2 1040.64 10.7587  -2 
   0   4   2 1040.64 10.7587   1 
  -4   4   2 632.875 8.28380  -2 
   1   4   2 632.875 8.28380   1 
  -5   4   2 308.115 4.98701  -2 
   2   4   2 308.115 4.98701   1 
  -6   4   2 308.924 5.23365  -2 
   3   4   2 308.924 5.23365   1 
  -7   4   2 1302.72 16.2567  -2 
   4   4   2 1302.72 16.2567   1 
  -8   4   2 918.080 15.3927  -2 
   5   4   2 918.080 15.3927   1 
  -9   4   2 986.360 16.6897  -2 
   6   4   2 986.360 16.6897   1 
 -10   4   2 603.213 11.9990  -2 
   7   4   2 603.213 11.9990   1 
   6   5   2 161.565 8.78371  -2 
 -10   5   2 161.565 8.78371   1 
  -9   5   2 1.29733 1.22603   1 
  -8   5   2 409.454 9.28627   1 
  -7   5   2 491.259 10.1206   1 
  -6   5   2 795.764 10.9048   1 
  -5   5   2 999.690 12.8904   1 
  -4   5   2 330.320 5.38073   1 
  -3   5   2 147.976 3.08591   1 
  -2   5   2 42.5129 1.23487   1 
  -1   5   2 1.88998 0.40130   1 
   0   5   2 872.866 10.9970   1 
   1   5   2 1293.49 15.6333   1 
   2   5   2 351.069 5.73421   1 
   3   5   2 642.493 9.20064   1 
   4   5   2 721.488 10.3502   1 
   5   5   2 28.1000 2.28708   1 
   6   5   2 118.834 4.47574   1 
   7   5   2 98.2786 5.73663   1 
 -10   6   2 246.432 7.55781   1 
  -9   6   2 126.864 5.03105   1 
  -8   6   2 15.6648 2.13986   1 
  -7   6   2 36.3423 1.99340   1 
  -6   6   2 32.3752 1.75268   1 
  -5   6   2 7.62048 1.00824   1 
  -4   6   2 7.22191 0.92634   1 
  -3   6   2 496.983 7.36805   1 
  -2   6   2 354.014 4.79235   1 
  -1   6   2 395.407 5.98542   1 
   0   6   2 594.488 8.32833   1 
   1   6   2 94.6300 2.64481   1 
   2   6   2 92.1582 2.74292   1 
   3   6   2 361.758 6.37454   1 
   4   6   2 160.074 4.03550   1 
   5   6   2 170.587 5.45278   1 
   6   6   2 204.102 8.47050   1 
   4   7   2 403.536 10.1586  -2 
  -9   7   2 403.536 10.1586   1 
   3   7   2 231.697 7.05205  -2 
  -8   7   2 231.697 7.05205   1 
   2   7   2 297.598 6.09185  -2 
  -7   7   2 297.598 6.09185   1 
   1   7   2 639.883 9.77643  -2 
  -6   7   2 639.883 9.77643   1 
   0   7   2 537.934 8.44358  -2 
  -5   7   2 537.934 8.44358   1 
  -1   7   2 393.844 6.64864  -2 
  -4   7   2 393.844 6.64864   1 
  -2   7   2 150.208 4.51367  -2 
  -3   7   2 150.208 4.51367   1 
  -3   7   2 306.588 6.76164  -2 
  -2   7   2 306.588 6.76164   1 
  -4   7   2 876.914 11.5871  -2 
  -1   7   2 876.914 11.5871   1 
  -5   7   2 1013.73 13.2252  -2 
   0   7   2 1013.73 13.2252   1 
  -6   7   2 368.059 6.41749  -2 
   1   7   2 368.059 6.41749   1 
  -7   7   2 130.479 3.73077  -2 
   2   7   2 130.479 3.73077   1 
  -8   7   2 121.742 4.63777  -2 
   3   7   2 121.742 4.63777   1 
  -9   7   2 184.886 6.07320  -2 
   4   7   2 184.886 6.07320   1 
  -9   8   2 177.131 6.57161   1 
  -8   8   2 164.593 5.83823   1 
  -7   8   2 36.7794 2.23246   1 
  -6   8   2 233.361 5.11530   1 
  -5   8   2 735.290 11.0093   1 
  -4   8   2 1518.34 23.0828   1 
  -3   8   2 688.099 12.2907   1 
  -2   8   2 95.5457 3.61970   1 
  -1   8   2 365.783 7.92063   1 
   0   8   2 12.2916 1.29610   1 
   1   8   2 95.4751 3.05704   1 
   2   8   2 42.7726 2.25713   1 
   3   8   2 192.541 5.92565   1 
   2   9   2 386.170 11.4801  -2 
  -8   9   2 386.170 11.4801   1 
   1   9   2 361.039 7.16270  -2 
  -7   9   2 361.039 7.16270   1 
   0   9   2 254.983 6.78375  -2 
  -6   9   2 254.983 6.78375   1 
  -1   9   2 164.909 5.25227  -2 
  -5   9   2 164.909 5.25227   1 
  -2   9   2 6.40418 1.51680  -2 
  -4   9   2 6.40418 1.51680   1 
  -3   9   2 2.39084 1.37439  -2 
  -3   9   2 2.39084 1.37439   1 
  -4   9   2 18.5404 2.05249  -2 
  -2   9   2 18.5404 2.05249   1 
  -5   9   2 228.942 6.19098  -2 
  -1   9   2 228.942 6.19098   1 
  -6   9   2 358.278 8.25728  -2 
   0   9   2 358.278 8.25728   1 
  -7   9   2 584.344 11.6006  -2 
   1   9   2 584.344 11.6006   1 
  -8   9   2 408.027 8.20493  -2 
   2   9   2 408.027 8.20493   1 
  -7  10   2 34.5053 4.21764   1 
  -6  10   2 128.757 5.09051   1 
  -5  10   2 48.0278 3.16134   1 
  -4  10   2 67.2518 3.51917   1 
  -3  10   2 116.536 4.57736   1 
  -2  10   2 11.1313 1.81011   1 
  -1  10   2 1.16999 1.04948   1 
   0  10   2 18.6902 3.37858   1 
   1  10   2 152.146 9.99674   1 
   0 -12   3 12.7289 2.78012   1 
   1 -12   3 11.0414 1.87674   1 
   4 -12   3 68.0876 6.03099  -2 
   2 -12   3 68.0876 6.03099   1 
   3 -12   3 180.206 9.08774  -2 
   3 -12   3 180.206 9.08774   1 
   4 -12   3 148.031 5.30207   1 
   5 -12   3 220.029 6.67142   1 
   6 -12   3 516.241 19.3682   1 
   7 -11   3 99.3391 6.12255  -2 
  -2 -11   3 99.3391 6.12255   1 
   6 -11   3 39.5736 3.24032  -2 
  -1 -11   3 39.5736 3.24032   1 
   5 -11   3 122.960 4.84391  -2 
   0 -11   3 122.960 4.84391   1 
   4 -11   3 480.167 10.1863  -2 
   1 -11   3 480.167 10.1863   1 
   3 -11   3 493.754 10.3795  -2 
   2 -11   3 493.754 10.3795   1 
   2 -11   3 492.171 10.3459  -2 
   3 -11   3 492.171 10.3459   1 
   1 -11   3 444.420 9.75321  -2 
   4 -11   3 444.420 9.75321   1 
   0 -11   3 54.9501 3.54608  -2 
   5 -11   3 54.9501 3.54608   1 
  -1 -11   3 78.7273 4.17772  -2 
   6 -11   3 78.7273 4.17772   1 
  -2 -11   3 209.297 5.54870  -2 
   7 -11   3 209.297 5.54870   1 
  -4 -10   3 73.2874 5.85146   1 
  -3 -10   3 92.8035 3.27658   1 
  -2 -10   3 49.1971 2.37241   1 
  -1 -10   3 21.0491 1.74912   1 
   0 -10   3 20.4063 1.91706   1 
   1 -10   3 3.83967 1.10195   1 
   2 -10   3 326.464 7.42671   1 
   3 -10   3 630.162 11.6686   1 
   4 -10   3 178.063 5.20214   1 
   5 -10   3 93.7128 3.10476   1 
   6 -10   3 19.0830 1.69369   1 
   7 -10   3 3.94956 1.05114   1 
   8 -10   3 2.87818 1.04627   1 
   9  -9   3 255.574 7.61453  -2 
  -5  -9   3 255.574 7.61453   1 
   8  -9   3 234.807 6.90428  -2 
  -4  -9   3 234.807 6.90428   1 
   7  -9   3 253.593 5.37715  -2 
  -3  -9   3 253.593 5.37715   1 
   6  -9   3 424.336 7.24582  -2 
  -2  -9   3 424.336 7.24582   1 
   5  -9   3 957.009 12.9243  -2 
  -1  -9   3 957.009 12.9243   1 
   4  -9   3 913.415 12.2349  -2 
   0  -9   3 913.415 12.2349   1 
   3  -9   3 753.399 12.8318  -2 
   1  -9   3 753.399 12.8318   1 
   2  -9   3 263.300 6.11856  -2 
   2  -9   3 263.300 6.11856   1 
   1  -9   3 323.820 7.05026  -2 
   3  -9   3 323.820 7.05026   1 
   0  -9   3 459.617 7.42758  -2 
   4  -9   3 459.617 7.42758   1 
  -1  -9   3 701.831 10.3182  -2 
   5  -9   3 701.831 10.3182   1 
  -2  -9   3 507.437 8.36880  -2 
   6  -9   3 507.437 8.36880   1 
  -3  -9   3 548.140 9.04194  -2 
   7  -9   3 548.140 9.04194   1 
  -4  -9   3 523.428 9.00252  -2 
   8  -9   3 523.428 9.00252   1 
  -5  -9   3 291.036 10.5228  -2 
   9  -9   3 291.036 10.5228   1 
  -6  -8   3 27.5889 2.71243   1 
  -5  -8   3 350.367 8.53925   1 
  -4  -8   3 1107.57 14.8273   1 
  -3  -8   3 758.285 10.8742   1 
  -2  -8   3 415.282 6.80214   1 
  -1  -8   3 15.1912 1.18803   1 
   0  -8   3 40.9097 1.70412   1 
   1  -8   3 10.5212 1.03022   1 
   2  -8   3 322.642 5.31572   1 
   3  -8   3 267.988 4.83708   1 
   4  -8   3 212.769 4.28788   1 
   5  -8   3 786.157 11.0342   1 
   6  -8   3 669.114 9.94572   1 
   7  -8   3 141.647 3.79515   1 
   8  -8   3 37.9669 2.21488   1 
   9  -8   3 338.007 8.50358   1 
  10  -8   3 394.484 12.9356   1 
  10  -7   3 126.338 7.77412  -2 
  -7  -7   3 126.338 7.77412   1 
   9  -7   3 79.3159 4.39939  -2 
  -6  -7   3 79.3159 4.39939   1 
   8  -7   3 55.6783 3.80618  -2 
  -5  -7   3 55.6783 3.80618   1 
   7  -7   3 156.896 3.96872  -2 
  -4  -7   3 156.896 3.96872   1 
   6  -7   3 201.986 4.34098  -2 
  -3  -7   3 201.986 4.34098   1 
   5  -7   3 839.156 11.2425  -2 
  -2  -7   3 839.156 11.2425   1 
   4  -7   3 112.180 2.86456  -2 
  -1  -7   3 112.180 2.86456   1 
   3  -7   3 248.153 5.56174  -2 
   0  -7   3 248.153 5.56174   1 
   2  -7   3 1166.93 24.6300  -2 
   1  -7   3 1166.93 24.6300   1 
   2  -7   3 362.008 5.54872   1 
   0  -7   3 390.197 10.7997  -2 
   3  -7   3 390.197 10.7997   1 
  -1  -7   3 52.6399 3.72432  -2 
   4  -7   3 52.6399 3.72432   1 
  -2  -7   3 1295.71 30.0599  -2 
   5  -7   3 1295.71 30.0599   1 
  -3  -7   3 381.200 8.21807  -2 
   6  -7   3 381.200 8.21807   1 
  -4  -7   3 216.020 4.83168  -2 
   7  -7   3 216.020 4.83168   1 
  -5  -7   3 111.891 4.68179  -2 
   8  -7   3 111.891 4.68179   1 
  -6  -7   3 27.6702 3.27059  -2 
   9  -7   3 27.6702 3.27059   1 
  -7  -7   3 91.0008 6.29793  -2 
  10  -7   3 91.0008 6.29793   1 
  -8  -6   3 157.497 8.19387   1 
  -7  -6   3 488.195 10.7919   1 
  -6  -6   3 504.244 10.6721   1 
  -5  -6   3 251.268 6.48394   1 
  -4  -6   3 115.040 2.92301   1 
  -3  -6   3 94.1385 2.50408   1 
  -2  -6   3 72.2411 2.03753   1 
  -1  -6   3 5.54739 0.68194   1 
   0  -6   3 667.515 7.40913   1 
   1  -6   3 2885.38 27.8373   1 
   2  -6   3 2013.67 22.9650   1 
   3  -6   3 953.760 11.9354   1 
   4  -6   3 107.197 2.61970   1 
   5  -6   3 15.1513 1.13297   1 
   6  -6   3 25.0313 1.46263   1 
   7  -6   3 222.625 4.64043   1 
   8  -6   3 93.1248 3.89944   1 
   9  -6   3 20.1874 2.22464   1 
  10  -6   3 270.024 7.52891   1 
  -8  -5   3 336.511 8.56070   1 
  -7  -5   3 135.388 4.94876   1 
  -6  -5   3 352.568 8.12555   1 
  -5  -5   3 105.820 3.83589   1 
  -4  -5   3 398.704 6.14143   1 
  -3  -5   3 720.777 9.42818   1 
  -2  -5   3 1517.19 17.5760   1 
  -1  -5   3 1910.14 21.4862   1 
   0  -5   3 1061.01 10.8375   1 
   1  -5   3 448.888 5.14740   1 
   2  -5   3 22.0313 0.97367   1 
   3  -5   3 92.0199 2.15594   1 
   4  -5   3 202.064 3.67093   1 
   5  -5   3 794.823 10.4763   1 
   6  -5   3 1147.66 14.5689   1 
   7  -5   3 1686.01 25.5931   1 
   8  -5   3 715.164 13.1495   1 
   9  -5   3 80.6347 3.77891   1 
  10  -5   3 11.9806 2.02511   1 
  10  -4   3 92.8217 4.92642  -2 
  -9  -4   3 92.8217 4.92642   1 
   9  -4   3 120.679 5.12133  -2 
  -8  -4   3 120.679 5.12133   1 
   8  -4   3 355.264 8.45057  -2 
  -7  -4   3 355.264 8.45057   1 
   7  -4   3 611.840 11.6165  -2 
  -6  -4   3 611.840 11.6165   1 
   6  -4   3 860.596 14.5249  -2 
  -5  -4   3 860.596 14.5249   1 
   5  -4   3 1334.58 15.9218  -2 
  -4  -4   3 1334.58 15.9218   1 
   4  -4   3 718.952 9.11543  -2 
  -3  -4   3 718.952 9.11543   1 
   3  -4   3 203.598 3.33238  -2 
  -2  -4   3 203.598 3.33238   1 
   2  -4   3 639.446 14.2175  -2 
  -1  -4   3 639.446 14.2175   1 
   1  -4   3 599.696 8.90275  -2 
   0  -4   3 599.696 8.90275   1 
   0  -4   3 1049.22 21.0101  -2 
   1  -4   3 1049.22 21.0101   1 
  -1  -4   3 1030.19 22.1828  -2 
   2  -4   3 1030.19 22.1828   1 
  -2  -4   3 262.583 7.81211  -2 
   3  -4   3 262.583 7.81211   1 
  -3  -4   3 958.142 11.7142  -2 
   4  -4   3 958.142 11.7142   1 
  -4  -4   3 936.432 11.8955  -2 
   5  -4   3 936.432 11.8955   1 
  -5  -4   3 370.480 6.04990  -2 
   6  -4   3 370.480 6.04990   1 
  -6  -4   3 538.170 10.3260  -2 
   7  -4   3 538.170 10.3260   1 
  -7  -4   3 419.734 9.06425  -2 
   8  -4   3 419.734 9.06425   1 
  -8  -4   3 277.003 7.35902  -2 
   9  -4   3 277.003 7.35902   1 
  -9  -4   3 197.215 9.97526  -2 
  10  -4   3 197.215 9.97526   1 
 -10  -3   3 278.528 16.1135   1 
  -9  -3   3 147.847 5.34404   1 
  -8  -3   3 44.0212 2.96692   1 
  -7  -3   3 1.52727 1.19089   1 
  -6  -3   3 79.5761 3.24503   1 
  -5  -3   3 1263.26 13.2624   1 
  -4  -3   3 1034.48 10.8268   1 
  -3  -3   3 4.29633 0.43741   1 
  -2  -3   3 429.698 4.78091   1 
  -1  -3   3 60.7352 1.13061   1 
   0  -3   3 223.257 2.70391   1 
   1  -3   3 1183.91 11.5952   1 
   2  -3   3 211.889 2.66640   1 
   3  -3   3 816.524 8.49353   1 
   4  -3   3 818.631 8.74302   1 
   5  -3   3 676.341 7.67331   1 
   6  -3   3 210.666 3.40070   1 
   7  -3   3 69.2272 2.98557   1 
   8  -3   3 34.0850 2.49133   1 
   9  -3   3 49.8161 3.05579   1 
  10  -3   3 0.32402 2.22514   1 
  10  -2   3 139.471 7.70147  -2 
 -10  -2   3 139.471 7.70147   1 
   9  -2   3 700.799 13.5602  -2 
  -9  -2   3 700.799 13.5602   1 
   8  -2   3 1749.65 27.1598  -2 
  -8  -2   3 1749.65 27.1598   1 
   7  -2   3 737.145 10.7108  -2 
  -7  -2   3 737.145 10.7108   1 
   6  -2   3 466.298 7.29637  -2 
  -6  -2   3 466.298 7.29637   1 
   5  -2   3 1524.34 18.5790  -2 
  -5  -2   3 1524.34 18.5790   1 
   4  -2   3 462.777 5.35724  -2 
  -4  -2   3 462.777 5.35724   1 
   3  -2   3 320.363 3.79042  -2 
  -3  -2   3 320.363 3.79042   1 
   2  -2   3 1093.64 12.9631  -2 
  -2  -2   3 1093.64 12.9631   1 
   1  -2   3 4816.81 45.3881  -2 
  -1  -2   3 4816.81 45.3881   1 
   0  -2   3 7929.94 74.6036  -2 
   0  -2   3 7929.94 74.6036   1 
  -1  -2   3 9999.99 109.990  -2 
   1  -2   3 9999.99 109.990   1 
  -2  -2   3 2143.29 23.8520  -2 
   2  -2   3 2143.29 23.8520   1 
  -3  -2   3 680.341 8.50127  -2 
   3  -2   3 680.341 8.50127   1 
  -4  -2   3 254.393 4.10727  -2 
   4  -2   3 254.393 4.10727   1 
  -5  -2   3 1282.03 13.3351  -2 
   5  -2   3 1282.03 13.3351   1 
  -6  -2   3 471.799 7.13081  -2 
   6  -2   3 471.799 7.13081   1 
  -7  -2   3 693.964 9.88843  -2 
   7  -2   3 693.964 9.88843   1 
  -8  -2   3 1101.84 18.0324  -2 
   8  -2   3 1101.84 18.0324   1 
  -9  -2   3 660.667 16.7333  -2 
   9  -2   3 660.667 16.7333   1 
 -10  -1   3 52.8584 4.87003   1 
  -9  -1   3 170.861 5.46036   1 
  -8  -1   3 122.526 3.50353   1 
  -7  -1   3 35.9619 1.88958   1 
  -6  -1   3 13.6839 1.21663   1 
  -5  -1   3 248.923 4.38008   1 
  -4  -1   3 1022.80 12.6836   1 
  -3  -1   3 5331.28 59.0015   1 
  -2  -1   3 4901.39 54.0416   1 
  -1  -1   3 215.948 3.07789   1 
   0  -1   3 4.44128 0.39889   1 
   1  -1   3 11.4279 0.61406   1 
   2  -1   3 1185.74 13.7347   1 
   3  -1   3 58.8760 1.58471   1 
   4  -1   3 73.6488 1.96390   1 
   5  -1   3 1365.91 14.1970   1 
   6  -1   3 1177.74 14.8984   1 
   7  -1   3 675.611 9.72299   1 
   8  -1   3 67.1451 3.07563   1 
   9  -1   3 31.4055 3.30040   1 
   9   0   3 19.7737 4.60857  -2 
 -10   0   3 19.7737 4.60857   1 
   8   0   3 175.126 6.00647  -2 
  -9   0   3 175.126 6.00647   1 
   7   0   3 435.588 9.47586  -2 
  -8   0   3 435.588 9.47586   1 
   6   0   3 444.762 7.32178  -2 
  -7   0   3 444.762 7.32178   1 
   5   0   3 977.414 15.6072  -2 
  -6   0   3 977.414 15.6072   1 
  -5   0   3 12.1890 1.00264   1 
  -4   0   3 70.4428 2.36133   1 
  -3   0   3 332.750 4.78135   1 
  -2   0   3 1370.35 15.8334   1 
  -1   0   3 13.6102 0.49224   1 
   0   0   3 1177.25 13.2648   1 
   1   0   3 972.641 11.2555   1 
   2   0   3 1148.94 13.3664   1 
  -4   0   3 1564.86 30.0555  -2 
   3   0   3 1564.86 30.0555   1 
  -5   0   3 171.109 3.84056  -2 
   4   0   3 171.109 3.84056   1 
  -6   0   3 656.902 8.73915  -2 
   5   0   3 656.902 8.73915   1 
  -7   0   3 372.441 6.22875  -2 
   6   0   3 372.441 6.22875   1 
  -8   0   3 826.237 14.0083  -2 
   7   0   3 826.237 14.0083   1 
  -9   0   3 174.560 5.45153  -2 
   8   0   3 174.560 5.45153   1 
 -10   0   3 6.50687 3.42253  -2 
   9   0   3 6.50687 3.42253   1 
   8   1   3 315.737 8.51135  -2 
 -10   1   3 315.737 8.51135   1 
   7   1   3 205.174 6.52801  -2 
  -9   1   3 205.174 6.52801   1 
   6   1   3 127.028 6.64083  -2 
  -8   1   3 127.028 6.64083   1 
   5   1   3 1264.72 28.3609  -2 
  -7   1   3 1264.72 28.3609   1 
   4   1   3 1362.42 29.4792  -2 
  -6   1   3 1362.42 29.4792   1 
  -5   1   3 1296.77 13.2540   1 
   2   1   3 1278.18 26.5056  -2 
  -4   1   3 1278.18 26.5056   1 
  -3   1   3 40.6111 1.06044   1 
  -2   1   3 320.992 3.68305   1 
  -1   1   3 18.1334 0.61741   1 
   0   1   3 945.965 9.43224   1 
  -3   1   3 1334.25 18.4420  -2 
   1   1   3 1334.25 18.4420   1 
  -4   1   3 1889.49 35.4151  -2 
   2   1   3 1889.49 35.4151   1 
  -5   1   3 2394.83 47.9300  -2 
   3   1   3 2394.83 47.9300   1 
   4   1   3 1079.12 11.4420   1 
  -7   1   3 682.286 17.1663  -2 
   5   1   3 682.286 17.1663   1 
  -8   1   3 97.4741 5.94526  -2 
   6   1   3 97.4741 5.94526   1 
  -9   1   3 218.127 9.20142  -2 
   7   1   3 218.127 9.20142   1 
 -10   1   3 148.479 5.33213  -2 
   8   1   3 148.479 5.33213   1 
 -11   2   3 76.4967 6.29954   1 
 -10   2   3 219.597 6.73547   1 
  -9   2   3 810.155 21.8547   1 
  -8   2   3 555.318 11.1548   1 
  -7   2   3 354.667 7.85743   1 
  -6   2   3 728.251 11.8584   1 
  -5   2   3 118.828 3.51170   1 
  -4   2   3 46.1595 1.18079   1 
  -3   2   3 46.6788 1.10322   1 
  -2   2   3 876.389 8.98027   1 
  -1   2   3 1850.49 17.9203   1 
   0   2   3 4603.83 43.2091   1 
   1   2   3 1822.97 17.7861   1 
   2   2   3 26.6696 0.89292   1 
   3   2   3 14.1650 0.78001   1 
   4   2   3 21.1573 1.23721   1 
   5   2   3 365.400 7.57001   1 
   6   2   3 873.373 14.7665   1 
   7   2   3 693.492 12.7651   1 
   8   2   3 375.607 8.63134   1 
   7   3   3 5.61666 2.63017  -2 
 -10   3   3 5.61666 2.63017   1 
   6   3   3 74.5168 4.13954  -2 
  -9   3   3 74.5168 4.13954   1 
   5   3   3 112.640 4.51836  -2 
  -8   3   3 112.640 4.51836   1 
   4   3   3 69.3027 3.28653  -2 
  -7   3   3 69.3027 3.28653   1 
   3   3   3 274.355 6.45839  -2 
  -6   3   3 274.355 6.45839   1 
   2   3   3 1242.81 12.9342  -2 
  -5   3   3 1242.81 12.9342   1 
   1   3   3 2001.32 19.7434  -2 
  -4   3   3 2001.32 19.7434   1 
   0   3   3 1828.59 18.0301  -2 
  -3   3   3 1828.59 18.0301   1 
  -1   3   3 245.686 3.28957  -2 
  -2   3   3 245.686 3.28957   1 
  -2   3   3 558.569 6.22269  -2 
  -1   3   3 558.569 6.22269   1 
  -3   3   3 982.307 10.1763  -2 
   0   3   3 982.307 10.1763   1 
  -4   3   3 1156.93 11.8838  -2 
   1   3   3 1156.93 11.8838   1 
  -5   3   3 718.784 11.5222  -2 
   2   3   3 718.784 11.5222   1 
  -6   3   3 203.055 3.85242  -2 
   3   3   3 203.055 3.85242   1 
  -7   3   3 119.637 3.85040  -2 
   4   3   3 119.637 3.85040   1 
  -8   3   3 237.038 6.01456  -2 
   5   3   3 237.038 6.01456   1 
  -9   3   3 158.383 5.07170  -2 
   6   3   3 158.383 5.07170   1 
 -10   3   3 3.92053 2.05637  -2 
   7   3   3 3.92053 2.05637   1 
 -10   4   3 163.357 5.93703   1 
  -9   4   3 407.805 9.65602   1 
  -8   4   3 144.502 5.02831   1 
  -7   4   3 151.774 4.84948   1 
  -6   4   3 0.53740 0.60736   1 
  -5   4   3 1517.56 18.2648   1 
  -4   4   3 1146.71 14.0847   1 
  -3   4   3 371.455 5.55037   1 
  -2   4   3 186.597 2.83351   1 
  -1   4   3 176.835 2.72665   1 
   0   4   3 604.608 6.86599   1 
   1   4   3 30.0891 1.33796   1 
   2   4   3 55.5144 1.87639   1 
   3   4   3 6.88431 0.88062   1 
   4   4   3 587.291 10.8845   1 
   5   4   3 573.002 11.0367   1 
   6   4   3 346.078 8.16543   1 
   7   4   3 93.5626 4.37955   1 
   6   5   3 136.185 5.86999  -2 
 -10   5   3 136.185 5.86999   1 
   5   5   3 162.156 6.00700  -2 
  -9   5   3 162.156 6.00700   1 
   4   5   3 891.121 16.4423  -2 
  -8   5   3 891.121 16.4423   1 
   3   5   3 839.999 15.3031  -2 
  -7   5   3 839.999 15.3031   1 
   2   5   3 1220.72 15.5928  -2 
  -6   5   3 1220.72 15.5928   1 
   1   5   3 2056.00 24.2262  -2 
  -5   5   3 2056.00 24.2262   1 
   0   5   3 1142.27 14.3414  -2 
  -4   5   3 1142.27 14.3414   1 
  -1   5   3 1.91789 1.04506  -2 
  -3   5   3 1.91789 1.04506   1 
  -2   5   3 25.0650 1.18728  -2 
  -2   5   3 25.0650 1.18728   1 
  -3   5   3 2.20859 0.95510  -2 
  -1   5   3 2.20859 0.95510   1 
  -4   5   3 1461.29 17.3788  -2 
   0   5   3 1461.29 17.3788   1 
  -5   5   3 3402.16 37.9431  -2 
   1   5   3 3402.16 37.9431   1 
  -6   5   3 1812.74 21.5712  -2 
   2   5   3 1812.74 21.5712   1 
  -7   5   3 641.517 11.6422  -2 
   3   5   3 641.517 11.6422   1 
  -8   5   3 399.089 8.64981  -2 
   4   5   3 399.089 8.64981   1 
  -9   5   3 73.3193 3.68285  -2 
   5   5   3 73.3193 3.68285   1 
 -10   5   3 150.277 7.15382  -2 
   6   5   3 150.277 7.15382   1 
  -9   6   3 148.701 5.61987   1 
  -8   6   3 30.7268 2.68390   1 
  -7   6   3 192.328 5.86743   1 
  -6   6   3 57.5310 2.30988   1 
  -5   6   3 2.88378 0.80685   1 
  -4   6   3 9.68868 1.08469   1 
  -3   6   3 994.162 12.8811   1 
  -2   6   3 1162.01 14.3075   1 
  -1   6   3 206.094 3.97858   1 
   0   6   3 96.8380 2.65173   1 
   1   6   3 0.79074 0.62893   1 
   2   6   3 31.2432 1.75446   1 
   3   6   3 60.3621 3.07978   1 
   4   6   3 86.9474 3.89897   1 
   5   6   3 145.254 5.27387   1 
  -9   7   3 79.1331 6.19257   1 
  -8   7   3 109.935 4.74203   1 
  -7   7   3 173.261 5.72288   1 
  -6   7   3 261.541 5.36276   1 
  -5   7   3 471.970 7.71063   1 
  -4   7   3 78.1649 2.84645   1 
  -3   7   3 173.408 4.81231   1 
  -2   7   3 61.6221 2.81161   1 
  -1   7   3 156.594 3.58314   1 
   0   7   3 410.458 6.76094   1 
   1   7   3 35.7094 1.88826   1 
   2   7   3 64.9631 3.20584   1 
   3   7   3 82.0060 3.76746   1 
   4   7   3 0.33859 1.21918   1 
   2   8   3 119.415 5.50495  -2 
  -8   8   3 119.415 5.50495   1 
   1   8   3 133.444 5.57585  -2 
  -7   8   3 133.444 5.57585   1 
   0   8   3 615.169 11.8239  -2 
  -6   8   3 615.169 11.8239   1 
  -1   8   3 965.446 16.3358  -2 
  -5   8   3 965.446 16.3358   1 
  -2   8   3 519.796 10.3836  -2 
  -4   8   3 519.796 10.3836   1 
  -3   8   3 486.978 9.89079  -2 
  -3   8   3 486.978 9.89079   1 
  -4   8   3 303.291 7.28534  -2 
  -2   8   3 303.291 7.28534   1 
  -5   8   3 409.190 8.84700  -2 
  -1   8   3 409.190 8.84700   1 
  -6   8   3 283.852 7.10628  -2 
   0   8   3 283.852 7.10628   1 
  -7   8   3 56.8900 2.88600  -2 
   1   8   3 56.8900 2.88600   1 
  -8   8   3 223.834 6.63902  -2 
   2   8   3 223.834 6.63902   1 
  -8   9   3 190.983 9.60177   1 
  -7   9   3 215.844 10.1576   1 
  -6   9   3 235.725 6.63292   1 
  -5   9   3 38.1162 2.79965   1 
  -4   9   3 57.3307 3.18558   1 
  -3   9   3 16.0805 1.98892   1 
  -2   9   3 43.7936 2.84889   1 
  -1   9   3 425.928 9.35457   1 
   0   9   3 894.383 15.8100   1 
  -2  10   3 126.297 6.69726  -2 
  -5  10   3 126.297 6.69726   1 
  -3  10   3 461.349 13.9752  -2 
  -4  10   3 461.349 13.9752   1 
  -4  10   3 412.025 14.0040  -2 
  -3  10   3 412.025 14.0040   1 
  -5  10   3 76.8629 5.51715  -2 
  -2  10   3 76.8629 5.51715   1 
  -1 -12   4 171.680 7.76966   1 
   0 -12   4 9.26586 1.69411   1 
   1 -12   4 1.59767 1.14776   1 
   2 -12   4 3.41525 1.22417   1 
   3 -12   4 211.835 6.27173   1 
   4 -12   4 322.358 8.10667   1 
   5 -12   4 303.246 7.87123   1 
   6 -12   4 358.903 12.5813   1 
  -3 -11   4 12.3477 3.08706   1 
  -2 -11   4 1.64011 0.95315   1 
  -1 -11   4 23.8864 2.24136   1 
   5 -11   4 91.2256 6.26755  -2 
   0 -11   4 91.2256 6.26755   1 
   1 -11   4 602.069 11.6202   1 
   2 -11   4 1212.75 19.6820   1 
   3 -11   4 433.220 9.28227   1 
   4 -11   4 166.980 5.23983   1 
   5 -11   4 -0.1111 0.84516   1 
  -1 -11   4 205.507 8.86154  -2 
   6 -11   4 205.507 8.86154   1 
  -2 -11   4 126.772 8.31417  -2 
   7 -11   4 126.772 8.31417   1 
   8 -10   4 64.3430 4.37193  -2 
  -4 -10   4 64.3430 4.37193   1 
   7 -10   4 251.169 7.34442  -2 
  -3 -10   4 251.169 7.34442   1 
   6 -10   4 616.027 9.75541  -2 
  -2 -10   4 616.027 9.75541   1 
  -1 -10   4 286.626 9.33754   1 
   4 -10   4 43.9093 3.91212  -2 
   0 -10   4 43.9093 3.91212   1 
   3 -10   4 186.914 8.06013  -2 
   1 -10   4 186.914 8.06013   1 
   2 -10   4 194.014 5.28903   1 
   1 -10   4 221.727 8.29845  -2 
   3 -10   4 221.727 8.29845   1 
   0 -10   4 87.4326 5.39939  -2 
   4 -10   4 87.4326 5.39939   1 
  -1 -10   4 208.286 4.90408  -2 
   5 -10   4 208.286 4.90408   1 
  -2 -10   4 371.856 8.86107  -2 
   6 -10   4 371.856 8.86107   1 
  -3 -10   4 211.410 5.34278  -2 
   7 -10   4 211.410 5.34278   1 
  -4 -10   4 60.9822 4.25710  -2 
   8 -10   4 60.9822 4.25710   1 
  -5  -9   4 239.827 7.14975   1 
  -4  -9   4 29.9206 2.66675   1 
  -3  -9   4 396.265 7.00738   1 
  -2  -9   4 240.486 4.95540   1 
  -1  -9   4 486.015 7.66214   1 
   0  -9   4 292.159 5.31572   1 
   1  -9   4 200.523 5.09688   1 
   2  -9   4 71.2705 2.85536   1 
   3  -9   4 24.7141 1.46564   1 
   4  -9   4 0.85178 0.60110   1 
   5  -9   4 58.4249 2.35663   1 
   6  -9   4 315.329 6.08079   1 
   7  -9   4 372.444 6.97535   1 
   8  -9   4 429.046 9.95671   1 
   9  -9   4 73.7386 4.62464   1 
   9  -8   4 479.881 11.0097  -2 
  -6  -8   4 479.881 11.0097   1 
   8  -8   4 633.596 12.8583  -2 
  -5  -8   4 633.596 12.8583   1 
   7  -8   4 676.344 13.0416  -2 
  -4  -8   4 676.344 13.0416   1 
   6  -8   4 859.309 11.8281  -2 
  -3  -8   4 859.309 11.8281   1 
   5  -8   4 575.880 8.61558  -2 
  -2  -8   4 575.880 8.61558   1 
   4  -8   4 582.172 8.44976  -2 
  -1  -8   4 582.172 8.44976   1 
   3  -8   4 488.089 8.75810  -2 
   0  -8   4 488.089 8.75810   1 
   2  -8   4 639.490 8.78212  -2 
   1  -8   4 639.490 8.78212   1 
   1  -8   4 1241.57 15.3367  -2 
   2  -8   4 1241.57 15.3367   1 
   0  -8   4 1088.38 13.8506  -2 
   3  -8   4 1088.38 13.8506   1 
  -1  -8   4 1373.34 17.0822  -2 
   4  -8   4 1373.34 17.0822   1 
  -2  -8   4 841.681 11.5797  -2 
   5  -8   4 841.681 11.5797   1 
  -3  -8   4 476.329 7.76193  -2 
   6  -8   4 476.329 7.76193   1 
  -4  -8   4 294.530 7.44447  -2 
   7  -8   4 294.530 7.44447   1 
  -5  -8   4 510.891 10.9617  -2 
   8  -8   4 510.891 10.9617   1 
  -6  -8   4 441.700 10.3212  -2 
   9  -8   4 441.700 10.3212   1 
  -7  -7   4 228.980 7.00294   1 
  -6  -7   4 46.7850 3.17322   1 
  -5  -7   4 27.0131 2.33516   1 
  -4  -7   4 9.40013 1.53881   1 
  -3  -7   4 51.4367 1.95367   1 
  -2  -7   4 45.0012 1.74194   1 
  -1  -7   4 358.323 5.65123   1 
   0  -7   4 496.316 6.02241   1 
   1  -7   4 692.326 7.84211   1 
   2  -7   4 573.993 7.90925   1 
   3  -7   4 1.07995 0.46974   1 
   4  -7   4 33.3039 1.55158   1 
   5  -7   4 22.1972 1.36131   1 
   6  -7   4 322.262 5.79967   1 
   7  -7   4 596.790 11.6206   1 
   8  -7   4 269.657 7.19044   1 
   9  -7   4 81.7874 4.06243   1 
  10  -7   4 116.495 6.66200   1 
   9  -6   4 207.407 6.91017  -2 
  -7  -6   4 207.407 6.91017   1 
   8  -6   4 28.5404 3.14694  -2 
  -6  -6   4 28.5404 3.14694   1 
   7  -6   4 231.157 6.39331  -2 
  -5  -6   4 231.157 6.39331   1 
   6  -6   4 632.779 11.7391  -2 
  -4  -6   4 632.779 11.7391   1 
   5  -6   4 379.102 5.96758  -2 
  -3  -6   4 379.102 5.96758   1 
   4  -6   4 263.194 4.48491  -2 
  -2  -6   4 263.194 4.48491   1 
   3  -6   4 278.909 5.78517  -2 
  -1  -6   4 278.909 5.78517   1 
   2  -6   4 1084.79 13.0073  -2 
   0  -6   4 1084.79 13.0073   1 
   1  -6   4 1122.47 23.2802  -2 
   1  -6   4 1122.47 23.2802   1 
   0  -6   4 1597.49 23.1032  -2 
   2  -6   4 1597.49 23.1032   1 
  -1  -6   4 569.531 9.74236  -2 
   3  -6   4 569.531 9.74236   1 
  -2  -6   4 162.383 6.48871  -2 
   4  -6   4 162.383 6.48871   1 
  -3  -6   4 189.833 4.98799  -2 
   5  -6   4 189.833 4.98799   1 
  -4  -6   4 278.197 5.18109  -2 
   6  -6   4 278.197 5.18109   1 
  -5  -6   4 110.278 4.22539  -2 
   7  -6   4 110.278 4.22539   1 
  -6  -6   4 43.3124 3.34235  -2 
   8  -6   4 43.3124 3.34235   1 
  -7  -6   4 278.172 7.73584  -2 
   9  -6   4 278.172 7.73584   1 
  -8  -6   4 347.371 11.9666  -2 
  10  -6   4 347.371 11.9666   1 
  -8  -5   4 451.752 10.4287   1 
  -7  -5   4 104.680 4.36649   1 
  -6  -5   4 21.6455 2.19868   1 
  -5  -5   4 18.2110 1.86407   1 
  -4  -5   4 1242.45 15.1650   1 
  -3  -5   4 2252.00 25.4537   1 
  -2  -5   4 2026.32 19.9278   1 
  -1  -5   4 1465.42 14.6512   1 
   0  -5   4 93.2965 1.70339   1 
   1  -5   4 85.6011 1.86095   1 
   2  -5   4 97.2512 2.10231   1 
   3  -5   4 271.442 4.30491   1 
   4  -5   4 73.9787 2.02016   1 
   5  -5   4 1245.14 15.3651   1 
   6  -5   4 1337.12 17.3797   1 
   7  -5   4 461.506 9.48845   1 
   8  -5   4 147.335 4.99038   1 
   9  -5   4 5.71662 1.50885   1 
  10  -5   4 102.296 4.67430   1 
  -9  -4   4 67.6048 3.98066   1 
  -8  -4   4 80.1830 3.94999   1 
  -7  -4   4 622.102 12.1329   1 
  -6  -4   4 557.864 10.8021   1 
  -5  -4   4 490.363 9.45697   1 
  -4  -4   4 275.188 3.77848   1 
  -3  -4   4 476.390 5.54976   1 
  -2  -4   4 4.03847 0.42319   1 
  -1  -4   4 83.8249 1.52221   1 
   0  -4   4 244.568 3.10167   1 
   1  -4   4 2434.35 23.3133   1 
   2  -4   4 3951.23 37.2996   1 
   3  -4   4 1663.38 16.4655   1 
   4  -4   4 1803.84 20.8060   1 
   5  -4   4 183.854 3.55164   1 
   6  -4   4 2.98368 0.94568   1 
   7  -4   4 232.552 6.07351   1 
   8  -4   4 809.403 22.0283   1 
   9  -4   4 238.367 6.68990   1 
  10  -4   4 240.992 6.99014   1 
   9  -3   4 178.076 6.26419  -2 
  -9  -3   4 178.076 6.26419   1 
   8  -3   4 89.3253 4.44606  -2 
  -8  -3   4 89.3253 4.44606   1 
   7  -3   4 47.2406 3.24884  -2 
  -7  -3   4 47.2406 3.24884   1 
   6  -3   4 50.6476 2.27215  -2 
  -6  -3   4 50.6476 2.27215   1 
   5  -3   4 160.021 3.52116  -2 
  -5  -3   4 160.021 3.52116   1 
   4  -3   4 805.326 10.5496  -2 
  -4  -3   4 805.326 10.5496   1 
   3  -3   4 464.039 11.3690  -2 
  -3  -3   4 464.039 11.3690   1 
   2  -3   4 1192.97 17.3637  -2 
  -2  -3   4 1192.97 17.3637   1 
  -1  -3   4 1109.35 11.0209   1 
   0  -3   4 88.5077 1.44940   1 
   1  -3   4 216.845 3.24735   1 
   2  -3   4 31.3035 1.08575   1 
  -3  -3   4 739.833 9.33909  -2 
   3  -3   4 739.833 9.33909   1 
  -4  -3   4 1141.90 11.8621  -2 
   4  -3   4 1141.90 11.8621   1 
  -5  -3   4 243.141 4.37429  -2 
   5  -3   4 243.141 4.37429   1 
  -6  -3   4 128.784 3.20688  -2 
   6  -3   4 128.784 3.20688   1 
  -7  -3   4 95.4570 3.87494  -2 
   7  -3   4 95.4570 3.87494   1 
  -8  -3   4 57.3031 3.50328  -2 
   8  -3   4 57.3031 3.50328   1 
  -9  -3   4 141.380 5.30397  -2 
   9  -3   4 141.380 5.30397   1 
 -10  -2   4 110.352 6.84080   1 
  -9  -2   4 282.609 7.47906   1 
  -8  -2   4 809.409 14.6887   1 
  -7  -2   4 278.111 5.47615   1 
  -6  -2   4 285.873 5.24207   1 
  -5  -2   4 504.957 7.45883   1 
  -4  -2   4 22.0873 1.17406   1 
  -3  -2   4 16.4515 0.94642   1 
  -2  -2   4 93.3576 1.97428   1 
  -1  -2   4 525.183 6.32287   1 
   0  -2   4 2340.72 25.7593   1 
   1  -2   4 4892.11 52.9712   1 
   2  -2   4 70.4721 1.67546   1 
   3  -2   4 63.9071 1.71371   1 
   4  -2   4 137.556 2.88509   1 
   5  -2   4 278.859 4.82221   1 
   6  -2   4 331.581 5.70890   1 
   7  -2   4 238.873 4.83840   1 
   8  -2   4 457.803 9.55373   1 
   9  -2   4 315.807 10.4957   1 
  10  -2   4 168.422 8.60390   1 
   9  -1   4 422.258 14.0949  -2 
 -10  -1   4 422.258 14.0949   1 
   8  -1   4 275.014 10.3295  -2 
  -9  -1   4 275.014 10.3295   1 
   7  -1   4 387.231 6.96458  -2 
  -8  -1   4 387.231 6.96458   1 
   6  -1   4 779.860 11.0949  -2 
  -7  -1   4 779.860 11.0949   1 
   5  -1   4 742.728 10.3017  -2 
  -6  -1   4 742.728 10.3017   1 
   4  -1   4 1294.68 16.0488  -2 
  -5  -1   4 1294.68 16.0488   1 
   3  -1   4 3681.69 41.6712  -2 
  -4  -1   4 3681.69 41.6712   1 
   2  -1   4 6136.18 67.9676  -2 
  -3  -1   4 6136.18 67.9676   1 
   1  -1   4 1542.97 17.9246  -2 
  -2  -1   4 1542.97 17.9246   1 
   0  -1   4 589.890 6.14221  -2 
  -1  -1   4 589.890 6.14221   1 
  -1  -1   4 696.973 9.97988  -2 
   0  -1   4 696.973 9.97988   1 
  -2  -1   4 749.149 9.06689  -2 
   1  -1   4 749.149 9.06689   1 
  -3  -1   4 3316.74 36.5788  -2 
   2  -1   4 3316.74 36.5788   1 
  -4  -1   4 2538.49 28.5931  -2 
   3  -1   4 2538.49 28.5931   1 
  -5  -1   4 1140.02 13.9914  -2 
   4  -1   4 1140.02 13.9914   1 
  -6  -1   4 1185.07 14.7988  -2 
   5  -1   4 1185.07 14.7988   1 
  -7  -1   4 1412.89 17.5987  -2 
   6  -1   4 1412.89 17.5987   1 
  -8  -1   4 228.701 4.76441  -2 
   7  -1   4 228.701 4.76441   1 
  -9  -1   4 229.885 6.02100  -2 
   8  -1   4 229.885 6.02100   1 
 -10  -1   4 297.818 10.1062  -2 
   9  -1   4 297.818 10.1062   1 
 -10   0   4 0.16976 1.35895   1 
  -9   0   4 102.849 4.33512   1 
  -8   0   4 715.206 10.7950   1 
  -7   0   4 266.411 5.24287   1 
  -6   0   4 313.528 5.47162   1 
  -5   0   4 214.591 4.00164   1 
  -4   0   4 514.584 7.20999   1 
  -3   0   4 15.2998 0.88633   1 
  -2   0   4 22.2831 0.68051   1 
  -1   0   4 726.049 7.45408   1 
   0   0   4 40.5901 1.14544   1 
   1   0   4 692.438 8.52001   1 
   2   0   4 1697.95 19.4602   1 
   3   0   4 907.587 11.3106   1 
   4   0   4 57.7089 1.88654   1 
   5   0   4 75.7807 2.34587   1 
   6   0   4 170.245 4.76202   1 
   7   0   4 367.465 7.99919   1 
   8   0   4 234.930 6.33407   1 
   9   0   4 25.1813 3.38693   1 
   8   1   4 40.8841 4.05794  -2 
 -10   1   4 40.8841 4.05794   1 
   7   1   4 -7.5794 3.33249  -2 
  -9   1   4 -7.5794 3.33249   1 
   6   1   4 179.289 5.90841  -2 
  -8   1   4 179.289 5.90841   1 
   5   1   4 193.447 5.68552  -2 
  -7   1   4 193.447 5.68552   1 
   4   1   4 278.709 5.07051  -2 
  -6   1   4 278.709 5.07051   1 
   3   1   4 613.550 10.2801  -2 
  -5   1   4 613.550 10.2801   1 
  -4   1   4 658.086 8.76210   1 
  -3   1   4 637.165 6.85649   1 
  -2   1   4 295.073 3.58400   1 
  -1   1   4 249.195 3.14280   1 
   0   1   4 5.79590 0.46264   1 
   1   1   4 2948.33 32.6388   1 
  -4   1   4 3402.61 62.1648  -2 
   2   1   4 3402.61 62.1648   1 
  -5   1   4 690.778 9.11032  -2 
   3   1   4 690.778 9.11032   1 
  -6   1   4 330.253 5.41597  -2 
   4   1   4 330.253 5.41597   1 
  -7   1   4 109.515 3.83979  -2 
   5   1   4 109.515 3.83979   1 
  -8   1   4 104.877 4.05436  -2 
   6   1   4 104.877 4.05436   1 
  -9   1   4 5.22696 2.37770  -2 
   7   1   4 5.22696 2.37770   1 
 -10   1   4 21.8547 3.15639  -2 
   8   1   4 21.8547 3.15639   1 
   7   2   4 721.032 14.8554  -2 
 -10   2   4 721.032 14.8554   1 
   6   2   4 1099.27 26.9467  -2 
  -9   2   4 1099.27 26.9467   1 
  -8   2   4 720.726 13.7092   1 
  -7   2   4 158.719 4.94146   1 
   3   2   4 481.059 13.1994  -2 
  -6   2   4 481.059 13.1994   1 
   2   2   4 53.1599 3.72103  -2 
  -5   2   4 53.1599 3.72103   1 
  -4   2   4 276.823 3.68186   1 
  -3   2   4 911.199 9.53593   1 
  -2   2   4 3665.25 34.8051   1 
  -1   2   4 907.669 9.42525   1 
   0   2   4 398.156 4.71592   1 
   1   2   4 1020.18 10.5752   1 
  -5   2   4 20.4047 2.90373  -2 
   2   2   4 20.4047 2.90373   1 
  -6   2   4 352.211 10.4689  -2 
   3   2   4 352.211 10.4689   1 
   4   2   4 158.126 4.43250   1 
   5   2   4 328.477 7.31093   1 
  -9   2   4 848.531 14.9426  -2 
   6   2   4 848.531 14.9426   1 
 -10   2   4 949.980 16.6591  -2 
   7   2   4 949.980 16.6591   1 
 -10   3   4 142.528 5.62940   1 
  -9   3   4 151.664 5.49808   1 
  -8   3   4 1.62603 1.15510   1 
  -7   3   4 88.0256 3.67977   1 
  -6   3   4 529.683 10.2597   1 
  -5   3   4 954.116 12.0857   1 
  -4   3   4 1237.51 12.8234   1 
  -3   3   4 1098.27 11.4519   1 
  -2   3   4 80.2802 1.67501   1 
  -1   3   4 49.0138 1.28582   1 
   0   3   4 137.041 2.31043   1 
   1   3   4 450.550 5.46058   1 
   2   3   4 115.229 2.64873   1 
   3   3   4 1057.32 16.5628   1 
   4   3   4 1055.57 16.9944   1 
   5   3   4 363.502 8.06647   1 
   6   3   4 140.820 4.89340   1 
   7   3   4 64.0049 3.53217   1 
   6   4   4 222.268 7.43103  -2 
 -10   4   4 222.268 7.43103   1 
   5   4   4 495.236 11.2896  -2 
  -9   4   4 495.236 11.2896   1 
   4   4   4 390.331 9.28802  -2 
  -8   4   4 390.331 9.28802   1 
   3   4   4 78.3588 3.80803  -2 
  -7   4   4 78.3588 3.80803   1 
   2   4   4 6.53876 1.79226  -2 
  -6   4   4 6.53876 1.79226   1 
   1   4   4 346.110 5.66736  -2 
  -5   4   4 346.110 5.66736   1 
   0   4   4 785.091 8.78979  -2 
  -4   4   4 785.091 8.78979   1 
  -1   4   4 408.815 5.20844  -2 
  -3   4   4 408.815 5.20844   1 
  -2   4   4 250.455 3.65030  -2 
  -2   4   4 250.455 3.65030   1 
  -3   4   4 243.093 3.55468  -2 
  -1   4   4 243.093 3.55468   1 
  -4   4   4 437.051 6.39553  -2 
   0   4   4 437.051 6.39553   1 
  -5   4   4 376.530 5.87934  -2 
   1   4   4 376.530 5.87934   1 
  -6   4   4 1.95262 1.48282  -2 
   2   4   4 1.95262 1.48282   1 
  -7   4   4 162.142 4.77378  -2 
   3   4   4 162.142 4.77378   1 
  -8   4   4 335.528 7.74621  -2 
   4   4   4 335.528 7.74621   1 
  -9   4   4 422.160 9.33338  -2 
   5   4   4 422.160 9.33338   1 
 -10   4   4 211.731 6.52809  -2 
   6   4   4 211.731 6.52809   1 
 -10   5   4 19.9013 3.54748   1 
  -9   5   4 320.834 8.59358   1 
  -8   5   4 568.991 11.9672   1 
  -7   5   4 472.304 10.1901   1 
  -6   5   4 451.925 9.55541   1 
  -5   5   4 62.4400 2.21202   1 
  -4   5   4 167.341 3.57856   1 
  -3   5   4 477.113 6.03213   1 
  -2   5   4 0.11882 0.41145   1 
  -1   5   4 216.124 3.99776   1 
   0   5   4 1049.08 13.2261   1 
   1   5   4 1484.22 18.0217   1 
   2   5   4 464.583 9.07673   1 
   3   5   4 193.692 5.49896   1 
   4   5   4 3.69680 1.25171   1 
   5   5   4 92.9921 4.14736   1 
   4   6   4 287.088 8.39579  -2 
  -9   6   4 287.088 8.39579   1 
   3   6   4 234.717 7.21378  -2 
  -8   6   4 234.717 7.21378   1 
   2   6   4 195.911 6.19158  -2 
  -7   6   4 195.911 6.19158   1 
   1   6   4 112.821 4.50085  -2 
  -6   6   4 112.821 4.50085   1 
   0   6   4 287.704 5.49550  -2 
  -5   6   4 287.704 5.49550   1 
  -1   6   4 1603.07 19.7291  -2 
  -4   6   4 1603.07 19.7291   1 
  -2   6   4 1434.87 21.4129  -2 
  -3   6   4 1434.87 21.4129   1 
  -3   6   4 1442.75 21.4845  -2 
  -2   6   4 1442.75 21.4845   1 
  -4   6   4 1250.27 15.5878  -2 
  -1   6   4 1250.27 15.5878   1 
  -5   6   4 183.337 4.02106  -2 
   0   6   4 183.337 4.02106   1 
  -6   6   4 68.0967 3.12965  -2 
   1   6   4 68.0967 3.12965   1 
  -7   6   4 147.858 4.81320  -2 
   2   6   4 147.858 4.81320   1 
  -8   6   4 143.856 4.98739  -2 
   3   6   4 143.856 4.98739   1 
  -9   6   4 174.497 5.82934  -2 
   4   6   4 174.497 5.82934   1 
  -9   7   4 8.77358 3.47184   1 
  -8   7   4 200.389 6.60461   1 
  -7   7   4 101.242 4.46520   1 
  -6   7   4 269.991 7.24086   1 
  -5   7   4 181.752 4.33786   1 
  -4   7   4 10.3161 1.48780   1 
  -3   7   4 30.3909 2.15650   1 
  -2   7   4 145.058 4.47938   1 
  -1   7   4 7.11964 1.11435   1 
   0   7   4 26.0540 1.70831   1 
   1   7   4 222.893 5.97745   1 
   2   7   4 175.747 5.47254   1 
   3   7   4 221.331 6.49487   1 
  -7   8   4 22.7836 2.62745   1 
  -6   8   4 358.886 12.4797   1 
  -1   8   4 357.701 11.2096  -2 
  -5   8   4 357.701 11.2096   1 
  -2   8   4 146.148 7.57950  -2 
  -4   8   4 146.148 7.57950   1 
  -3   8   4 237.572 6.55627  -2 
  -3   8   4 237.572 6.55627   1 
  -2   8   4 64.7167 3.20963   1 
  -5   8   4 182.553 7.91974  -2 
  -1   8   4 182.553 7.91974   1 
  -6   8   4 156.469 7.52724  -2 
   0   8   4 156.469 7.52724   1 
  -7   8   4 155.628 5.64581  -2 
   1   8   4 155.628 5.64581   1 
  -8   8   4 432.225 14.7160  -2 
   2   8   4 432.225 14.7160   1 
  -2   9   4 151.703 5.64696  -2 
  -5   9   4 151.703 5.64696   1 
  -3   9   4 12.5917 2.93569  -2 
  -4   9   4 12.5917 2.93569   1 
  -4   9   4 36.2142 3.42674  -2 
  -3   9   4 36.2142 3.42674   1 
  -5   9   4 178.697 6.00096  -2 
  -2   9   4 178.697 6.00096   1 
   6 -12   5 68.9833 4.84520  -2 
  -1 -12   5 68.9833 4.84520   1 
   5 -12   5 162.117 5.51521  -2 
   0 -12   5 162.117 5.51521   1 
   4 -12   5 160.774 5.43220  -2 
   1 -12   5 160.774 5.43220   1 
   3 -12   5 207.668 6.21657  -2 
   2 -12   5 207.668 6.21657   1 
   2 -12   5 320.989 8.03087  -2 
   3 -12   5 320.989 8.03087   1 
   1 -12   5 294.843 7.68044  -2 
   4 -12   5 294.843 7.68044   1 
   0 -12   5 328.438 8.26833  -2 
   5 -12   5 328.438 8.26833   1 
  -1 -12   5 131.575 7.12387  -2 
   6 -12   5 131.575 7.12387   1 
  -3 -11   5 20.8736 3.66284   1 
  -2 -11   5 20.5842 2.19126   1 
  -1 -11   5 120.098 4.38478   1 
   0 -11   5 487.979 13.6340   1 
   1 -11   5 850.894 14.8538   1 
   2 -11   5 725.664 13.1252   1 
   3 -11   5 141.750 4.68939   1 
   4 -11   5 18.7797 2.09520   1 
   5 -11   5 111.781 4.27602   1 
   6 -11   5 184.519 4.72963   1 
   7 -11   5 223.282 6.82846   1 
   8 -10   5 201.293 10.4422  -2 
  -4 -10   5 201.293 10.4422   1 
   7 -10   5 673.266 19.0808  -2 
  -3 -10   5 673.266 19.0808   1 
   6 -10   5 998.807 17.6183  -2 
  -2 -10   5 998.807 17.6183   1 
   5 -10   5 422.564 13.2586  -2 
  -1 -10   5 422.564 13.2586   1 
   0 -10   5 15.7775 1.69669   1 
   1 -10   5 18.6660 1.75044   1 
   2 -10   5 53.9874 2.66813   1 
   3 -10   5 264.872 6.34187   1 
   4 -10   5 68.7440 2.52526   1 
  -1 -10   5 311.244 10.5176  -2 
   5 -10   5 311.244 10.5176   1 
  -2 -10   5 894.762 23.7670  -2 
   6 -10   5 894.762 23.7670   1 
  -3 -10   5 737.801 14.3044  -2 
   7 -10   5 737.801 14.3044   1 
  -4 -10   5 135.364 8.46206  -2 
   8 -10   5 135.364 8.46206   1 
   8  -9   5 157.351 9.44158  -2 
  -5  -9   5 157.351 9.44158   1 
   7  -9   5 78.8438 6.77460  -2 
  -4  -9   5 78.8438 6.77460   1 
   6  -9   5 567.656 16.4079  -2 
  -3  -9   5 567.656 16.4079   1 
  -2  -9   5 591.153 8.97412   1 
  -1  -9   5 273.479 5.18231   1 
   0  -9   5 143.244 3.42760   1 
   1  -9   5 0.59419 0.57912   1 
   2  -9   5 40.9571 2.19895   1 
   3  -9   5 317.190 5.56800   1 
   4  -9   5 41.4314 1.90063   1 
  -2  -9   5 416.803 13.2218  -2 
   5  -9   5 416.803 13.2218   1 
  -3  -9   5 431.296 9.46314  -2 
   6  -9   5 431.296 9.46314   1 
  -4  -9   5 208.146 9.67332  -2 
   7  -9   5 208.146 9.67332   1 
  -5  -9   5 210.162 10.4297  -2 
   8  -9   5 210.162 10.4297   1 
   9  -9   5 59.9170 5.78880   1 
  -6  -8   5 534.777 11.6953   1 
  -5  -8   5 218.644 6.53754   1 
  -4  -8   5 297.341 7.43754   1 
  -3  -8   5 163.868 4.99592   1 
  -2  -8   5 72.0735 2.35115   1 
  -1  -8   5 63.0515 2.11406   1 
   0  -8   5 6.42691 0.88059   1 
   1  -8   5 176.592 3.01857   1 
   2  -8   5 2101.30 24.4751   1 
   3  -8   5 1531.76 18.5743   1 
   4  -8   5 450.053 7.08106   1 
   5  -8   5 497.863 7.79988   1 
   6  -8   5 10.5691 1.55902   1 
   7  -8   5 176.185 7.37902   1 
   8  -8   5 85.4229 4.05614   1 
   9  -8   5 45.8006 3.25077   1 
   9  -7   5 349.238 9.23417  -2 
  -7  -7   5 349.238 9.23417   1 
   8  -7   5 383.177 9.34203  -2 
  -6  -7   5 383.177 9.34203   1 
   7  -7   5 522.211 10.9901  -2 
  -5  -7   5 522.211 10.9901   1 
   6  -7   5 182.652 5.42510  -2 
  -4  -7   5 182.652 5.42510   1 
   5  -7   5 148.028 4.58378  -2 
  -3  -7   5 148.028 4.58378   1 
   4  -7   5 781.173 10.3699  -2 
  -2  -7   5 781.173 10.3699   1 
   3  -7   5 2092.50 24.0167  -2 
  -1  -7   5 2092.50 24.0167   1 
   2  -7   5 1431.41 14.7632  -2 
   0  -7   5 1431.41 14.7632   1 
   1  -7   5 1022.93 12.6172  -2 
   1  -7   5 1022.93 12.6172   1 
   0  -7   5 1163.38 12.2808  -2 
   2  -7   5 1163.38 12.2808   1 
  -1  -7   5 925.234 11.8581  -2 
   3  -7   5 925.234 11.8581   1 
  -2  -7   5 830.663 13.7185  -2 
   4  -7   5 830.663 13.7185   1 
  -3  -7   5 273.286 5.02590  -2 
   5  -7   5 273.286 5.02590   1 
  -4  -7   5 350.621 7.86291  -2 
   6  -7   5 350.621 7.86291   1 
  -5  -7   5 776.471 14.2042  -2 
   7  -7   5 776.471 14.2042   1 
  -6  -7   5 809.977 15.0501  -2 
   8  -7   5 809.977 15.0501   1 
  -7  -7   5 316.717 8.37438  -2 
   9  -7   5 316.717 8.37438   1 
  -8  -6   5 2.45253 1.57397   1 
  -7  -6   5 43.5154 3.20580   1 
  -6  -6   5 68.6962 3.51822   1 
  -5  -6   5 419.826 9.07513   1 
  -4  -6   5 482.450 9.56327   1 
  -3  -6   5 106.171 2.56825   1 
  -2  -6   5 226.251 3.33569   1 
  -1  -6   5 42.0590 1.21746   1 
   0  -6   5 313.303 4.11570   1 
   1  -6   5 95.5458 2.15503   1 
   2  -6   5 135.150 2.30685   1 
   3  -6   5 39.3465 1.43583   1 
   4  -6   5 357.997 5.63681   1 
   5  -6   5 885.142 12.2036   1 
   6  -6   5 6.43920 1.27122   1 
   7  -6   5 27.9686 2.24466   1 
   8  -6   5 34.6898 2.68706   1 
   9  -6   5 320.363 8.32428   1 
   9  -5   5 285.219 8.17874  -2 
  -8  -5   5 285.219 8.17874   1 
   8  -5   5 263.928 7.37888  -2 
  -7  -5   5 263.928 7.37888   1 
   7  -5   5 268.169 7.09105  -2 
  -6  -5   5 268.169 7.09105   1 
   6  -5   5 387.414 8.40647  -2 
  -5  -5   5 387.414 8.40647   1 
   5  -5   5 1261.55 19.7950  -2 
  -4  -5   5 1261.55 19.7950   1 
   4  -5   5 2201.90 21.7748  -2 
  -3  -5   5 2201.90 21.7748   1 
   3  -5   5 1384.65 16.0533  -2 
  -2  -5   5 1384.65 16.0533   1 
   2  -5   5 132.944 2.59741  -2 
  -1  -5   5 132.944 2.59741   1 
   1  -5   5 715.497 7.76488  -2 
   0  -5   5 715.497 7.76488   1 
   0  -5   5 692.360 10.4852  -2 
   1  -5   5 692.360 10.4852   1 
  -1  -5   5 170.977 3.10428  -2 
   2  -5   5 170.977 3.10428   1 
  -2  -5   5 832.973 10.4874  -2 
   3  -5   5 832.973 10.4874   1 
  -3  -5   5 1394.27 16.7237  -2 
   4  -5   5 1394.27 16.7237   1 
  -4  -5   5 1154.89 18.1666  -2 
   5  -5   5 1154.89 18.1666   1 
  -5  -5   5 738.883 13.1760  -2 
   6  -5   5 738.883 13.1760   1 
  -6  -5   5 540.317 10.8749  -2 
   7  -5   5 540.317 10.8749   1 
  -7  -5   5 110.649 4.63953  -2 
   8  -5   5 110.649 4.63953   1 
  -8  -5   5 206.938 6.63450  -2 
   9  -5   5 206.938 6.63450   1 
  -9  -4   5 25.8573 2.85853   1 
  -8  -4   5 530.719 11.3328   1 
  -7  -4   5 1330.16 21.8735   1 
  -6  -4   5 520.989 10.3580   1 
  -5  -4   5 438.202 6.94098   1 
  -4  -4   5 249.946 4.49232   1 
  -3  -4   5 9.65561 0.63208   1 
  -2  -4   5 153.839 2.33647   1 
  -1  -4   5 136.158 2.13086   1 
   0  -4   5 858.663 8.91780   1 
   1  -4   5 1577.79 15.5442   1 
   2  -4   5 4689.13 51.2371   1 
   3  -4   5 2183.19 24.8908   1 
   4  -4   5 155.947 3.14290   1 
   5  -4   5 6.97012 0.84904   1 
   6  -4   5 171.253 4.94409   1 
   7  -4   5 323.862 7.61846   1 
   8  -4   5 246.549 6.72175   1 
   9  -4   5 212.854 6.44749   1 
  10  -4   5 228.632 11.5809   1 
   9  -3   5 130.544 7.92888  -2 
  -9  -3   5 130.544 7.92888   1 
  -8  -3   5 22.2479 2.39959   1 
  -7  -3   5 23.3556 2.25470   1 
  -6  -3   5 150.276 3.65151   1 
  -5  -3   5 22.3669 1.40504   1 
  -4  -3   5 108.762 2.65315   1 
  -3  -3   5 872.258 11.1482   1 
  -2  -3   5 2132.01 24.5716   1 
  -1  -3   5 1676.25 16.3660   1 
   0  -3   5 934.805 9.50663   1 
   1  -3   5 172.288 2.93039   1 
   2  -3   5 369.304 5.31745   1 
   3  -3   5 181.309 3.33805   1 
   4  -3   5 158.555 3.23839   1 
   5  -3   5 377.978 6.06843   1 
   6  -3   5 566.669 8.48938   1 
   7  -3   5 877.766 15.2514   1 
   8  -3   5 272.756 7.06648   1 
   9  -3   5 2.14984 1.39364   1 
   8  -2   5 173.463 6.19816  -2 
  -9  -2   5 173.463 6.19816   1 
   7  -2   5 225.144 5.37940  -2 
  -8  -2   5 225.144 5.37940   1 
   6  -2   5 578.328 9.13306  -2 
  -7  -2   5 578.328 9.13306   1 
   5  -2   5 265.840 5.16545  -2 
  -6  -2   5 265.840 5.16545   1 
   4  -2   5 765.263 12.9406  -2 
  -5  -2   5 765.263 12.9406   1 
   3  -2   5 146.030 3.94876  -2 
  -4  -2   5 146.030 3.94876   1 
   2  -2   5 1229.61 18.2102  -2 
  -3  -2   5 1229.61 18.2102   1 
   1  -2   5 1818.90 35.8186  -2 
  -2  -2   5 1818.90 35.8186   1 
   0  -2   5 1773.03 32.1257  -2 
  -1  -2   5 1773.03 32.1257   1 
  -1  -2   5 993.986 19.1141  -2 
   0  -2   5 993.986 19.1141   1 
   1  -2   5 95.5106 2.02533   1 
   2  -2   5 306.665 4.65096   1 
  -4  -2   5 82.9656 2.82022  -2 
   3  -2   5 82.9656 2.82022   1 
  -5  -2   5 335.795 5.45928  -2 
   4  -2   5 335.795 5.45928   1 
  -6  -2   5 119.973 3.13522  -2 
   5  -2   5 119.973 3.13522   1 
  -7  -2   5 382.510 6.52214  -2 
   6  -2   5 382.510 6.52214   1 
  -8  -2   5 213.676 4.82881  -2 
   7  -2   5 213.676 4.82881   1 
  -9  -2   5 304.300 10.4108  -2 
   8  -2   5 304.300 10.4108   1 
 -10  -2   5 234.803 9.43283  -2 
   9  -2   5 234.803 9.43283   1 
  -9  -1   5 427.625 9.81646   1 
  -8  -1   5 137.195 3.88530   1 
  -7  -1   5 98.8667 3.06253   1 
  -6  -1   5 279.035 5.19868   1 
  -5  -1   5 947.607 12.4816   1 
  -4  -1   5 1172.37 14.6403   1 
  -3  -1   5 818.024 10.4468   1 
  -2  -1   5 1855.47 21.4879   1 
  -1  -1   5 72.5588 1.33873   1 
   0  -1   5 7.67829 0.62457   1 
   1  -1   5 1.29562 0.39115   1 
   2  -1   5 1209.15 14.4398   1 
   3  -1   5 1475.00 17.5304   1 
   4  -1   5 1545.30 23.2511   1 
   5  -1   5 1148.97 14.6745   1 
   6  -1   5 312.791 5.73396   1 
   7  -1   5 2.53249 1.11748   1 
   8  -1   5 111.384 4.29656   1 
   9  -1   5 96.6349 6.41018   1 
   8   0   5 168.241 5.96351  -2 
 -10   0   5 168.241 5.96351   1 
   7   0   5 538.122 11.3937  -2 
  -9   0   5 538.122 11.3937   1 
   6   0   5 1483.34 23.9705  -2 
  -8   0   5 1483.34 23.9705   1 
   5   0   5 840.422 11.8035  -2 
  -7   0   5 840.422 11.8035   1 
   4   0   5 357.612 6.03093  -2 
  -6   0   5 357.612 6.03093   1 
   3   0   5 549.642 8.00788  -2 
  -5   0   5 549.642 8.00788   1 
   2   0   5 533.309 7.54088  -2 
  -4   0   5 533.309 7.54088   1 
   1   0   5 960.060 12.0047  -2 
  -3   0   5 960.060 12.0047   1 
   0   0   5 835.037 8.67945  -2 
  -2   0   5 835.037 8.67945   1 
  -1   0   5 1238.79 12.4005  -2 
  -1   0   5 1238.79 12.4005   1 
  -2   0   5 1905.04 21.5683  -2 
   0   0   5 1905.04 21.5683   1 
  -3   0   5 2168.46 24.5442  -2 
   1   0   5 2168.46 24.5442   1 
  -4   0   5 1128.53 13.6627  -2 
   2   0   5 1128.53 13.6627   1 
  -5   0   5 332.558 5.25825  -2 
   3   0   5 332.558 5.25825   1 
  -6   0   5 182.709 3.69220  -2 
   4   0   5 182.709 3.69220   1 
  -7   0   5 691.955 9.77120  -2 
   5   0   5 691.955 9.77120   1 
  -8   0   5 972.103 16.0565  -2 
   6   0   5 972.103 16.0565   1 
  -9   0   5 516.108 10.3180  -2 
   7   0   5 516.108 10.3180   1 
 -10   0   5 345.432 8.19463  -2 
   8   0   5 345.432 8.19463   1 
 -10   1   5 2.74625 1.47999   1 
  -9   1   5 26.9041 2.69299   1 
  -8   1   5 45.6331 2.96786   1 
  -7   1   5 61.7101 3.10614   1 
  -6   1   5 39.6054 1.78458   1 
  -5   1   5 150.175 3.27096   1 
  -4   1   5 311.900 5.04423   1 
  -3   1   5 1917.38 18.8297   1 
  -2   1   5 510.373 5.78739   1 
  -1   1   5 163.625 2.45466   1 
   0   1   5 27.0617 1.10872   1 
   1   1   5 355.456 5.26161   1 
   2   1   5 400.422 5.92046   1 
   3   1   5 2.17343 0.60203   1 
   4   1   5 154.828 4.36665   1 
   5   1   5 112.740 3.91862   1 
   6   1   5 98.1636 3.90172   1 
   7   1   5 99.3819 4.15238   1 
   8   1   5 0.19251 1.30700   1 
   7   2   5 409.515 10.5085  -2 
 -10   2   5 409.515 10.5085   1 
   6   2   5 450.989 10.5960  -2 
  -9   2   5 450.989 10.5960   1 
   5   2   5 445.538 10.0993  -2 
  -8   2   5 445.538 10.0993   1 
   4   2   5 873.984 15.6053  -2 
  -7   2   5 873.984 15.6053   1 
   3   2   5 410.267 8.70038  -2 
  -6   2   5 410.267 8.70038   1 
   2   2   5 31.0540 2.36896  -2 
  -5   2   5 31.0540 2.36896   1 
   1   2   5 1129.15 17.7638  -2 
  -4   2   5 1129.15 17.7638   1 
   0   2   5 1924.44 28.0409  -2 
  -3   2   5 1924.44 28.0409   1 
  -1   2   5 2354.80 46.2007  -2 
  -2   2   5 2354.80 46.2007   1 
  -2   2   5 2829.61 27.3634  -2 
  -1   2   5 2829.61 27.3634   1 
  -3   2   5 1441.21 20.5921  -2 
   0   2   5 1441.21 20.5921   1 
  -4   2   5 477.722 6.76025  -2 
   1   2   5 477.722 6.76025   1 
  -5   2   5 34.9701 2.11943  -2 
   2   2   5 34.9701 2.11943   1 
  -6   2   5 185.772 4.87456  -2 
   3   2   5 185.772 4.87456   1 
  -7   2   5 611.897 11.1786  -2 
   4   2   5 611.897 11.1786   1 
  -8   2   5 347.971 7.96407  -2 
   5   2   5 347.971 7.96407   1 
  -9   2   5 671.703 12.8046  -2 
   6   2   5 671.703 12.8046   1 
 -10   2   5 571.167 11.8493  -2 
   7   2   5 571.167 11.8493   1 
 -10   3   5 242.596 7.54840   1 
   5   3   5 238.916 10.3048  -2 
  -9   3   5 238.916 10.3048   1 
   4   3   5 695.052 19.0796  -2 
  -8   3   5 695.052 19.0796   1 
  -7   3   5 572.804 11.4901   1 
  -6   3   5 277.702 6.74489   1 
  -5   3   5 1294.86 16.3028   1 
  -4   3   5 616.803 7.19885   1 
  -3   3   5 14.5024 0.84857   1 
  -2   3   5 57.9771 1.50244   1 
  -1   3   5 51.8791 1.42347   1 
   0   3   5 1.58886 0.42546   1 
  -5   3   5 1634.55 34.5687  -2 
   1   3   5 1634.55 34.5687   1 
   2   3   5 1705.21 24.7960   1 
  -7   3   5 993.371 23.7393  -2 
   3   3   5 993.371 23.7393   1 
   4   3   5 710.590 12.7733   1 
  -9   3   5 316.086 11.6938  -2 
   5   3   5 316.086 11.6938   1 
 -10   3   5 113.577 5.10287  -2 
   6   3   5 113.577 5.10287   1 
 -10   4   5 246.143 16.0422   1 
   5   4   5 311.756 12.2463  -2 
  -9   4   5 311.756 12.2463   1 
   4   4   5 294.102 11.2249  -2 
  -8   4   5 294.102 11.2249   1 
  -7   4   5 139.228 4.93214   1 
  -6   4   5 7.34861 1.39579   1 
  -5   4   5 14.8236 1.73381   1 
  -4   4   5 36.0912 1.35635   1 
  -3   4   5 231.217 3.58374   1 
  -2   4   5 812.409 9.17248   1 
  -1   4   5 250.343 3.76283   1 
   0   4   5 386.760 5.98221   1 
   1   4   5 396.689 7.79500   1 
   2   4   5 0.40041 0.77557   1 
   3   4   5 109.593 3.96373   1 
   4   4   5 115.411 4.34585   1 
   5   4   5 151.523 5.27787   1 
   4   5   5 180.423 6.65746  -2 
  -9   5   5 180.423 6.65746   1 
   3   5   5 323.476 8.63121  -2 
  -8   5   5 323.476 8.63121   1 
   2   5   5 145.611 5.35240  -2 
  -7   5   5 145.611 5.35240   1 
   1   5   5 464.639 9.99359  -2 
  -6   5   5 464.639 9.99359   1 
   0   5   5 963.925 16.5349  -2 
  -5   5   5 963.925 16.5349   1 
  -1   5   5 248.551 4.80571  -2 
  -4   5   5 248.551 4.80571   1 
  -2   5   5 17.4245 1.57588  -2 
  -3   5   5 17.4245 1.57588   1 
  -3   5   5 36.6107 1.84735  -2 
  -2   5   5 36.6107 1.84735   1 
  -4   5   5 448.517 6.91773  -2 
  -1   5   5 448.517 6.91773   1 
  -5   5   5 838.082 13.7865  -2 
   0   5   5 838.082 13.7865   1 
  -6   5   5 544.634 10.2132  -2 
   1   5   5 544.634 10.2132   1 
  -7   5   5 122.130 4.38103  -2 
   2   5   5 122.130 4.38103   1 
  -8   5   5 135.798 4.88531  -2 
   3   5   5 135.798 4.88531   1 
  -9   5   5 90.1621 4.28516  -2 
   4   5   5 90.1621 4.28516   1 
  -9   6   5 484.726 13.3102   1 
  -8   6   5 139.231 5.41603   1 
  -7   6   5 21.6838 2.45433   1 
  -6   6   5 0.98089 1.08976   1 
  -5   6   5 277.191 5.43097   1 
  -4   6   5 968.092 13.0984   1 
  -3   6   5 1442.46 21.7196   1 
  -2   6   5 571.320 10.3820   1 
  -1   6   5 130.950 3.33623   1 
   0   6   5 134.901 4.24963   1 
   1   6   5 0.25813 0.91860   1 
   2   6   5 52.8263 3.03387   1 
   3   6   5 130.435 4.87874   1 
   2   7   5 699.581 21.2811  -2 
  -8   7   5 699.581 21.2811   1 
   1   7   5 693.375 14.1948  -2 
  -7   7   5 693.375 14.1948   1 
   0   7   5 338.452 8.60069  -2 
  -6   7   5 338.452 8.60069   1 
  -1   7   5 94.6390 5.94881  -2 
  -5   7   5 94.6390 5.94881   1 
  -2   7   5 30.0045 2.45846  -2 
  -4   7   5 30.0045 2.45846   1 
  -3   7   5 13.5546 1.95882  -2 
  -3   7   5 13.5546 1.95882   1 
  -4   7   5 20.2401 2.10500  -2 
  -2   7   5 20.2401 2.10500   1 
  -5   7   5 65.0225 4.53728  -2 
  -1   7   5 65.0225 4.53728   1 
  -6   7   5 304.001 7.25512  -2 
   0   7   5 304.001 7.25512   1 
  -7   7   5 790.142 14.3191  -2 
   1   7   5 790.142 14.3191   1 
  -8   7   5 681.436 19.1972  -2 
   2   7   5 681.436 19.1972   1 
  -6   8   5 44.5370 4.44558   1 
  -5   8   5 26.6429 2.45307   1 
  -4   8   5 76.2876 3.58295   1 
  -3   8   5 272.169 6.99023   1 
  -2   8   5 102.046 4.09987   1 
  -1   8   5 27.5166 3.37216   1 
   0   8   5 -0.6521 1.50460   1 
   1   8   5 64.6524 5.32412   1 
  -3   9   5 62.1541 6.07660  -2 
  -4   9   5 62.1541 6.07660   1 
  -4   9   5 128.464 7.92350  -2 
  -3   9   5 128.464 7.92350   1 
  -1 -12   6 80.1670 3.82379   1 
   0 -12   6 56.0521 3.19033   1 
   1 -12   6 3.02912 1.20208   1 
   2 -12   6 3.44221 1.30377   1 
   3 -12   6 102.919 4.15012   1 
   4 -12   6 198.487 5.96649   1 
   5 -12   6 145.897 5.14837   1 
   7 -12   6 15.6723 5.42685   1 
   7 -11   6 96.7472 6.59067  -2 
  -3 -11   6 96.7472 6.59067   1 
   6 -11   6 175.784 5.87863  -2 
  -2 -11   6 175.784 5.87863   1 
   5 -11   6 371.073 8.31124  -2 
  -1 -11   6 371.073 8.31124   1 
   4 -11   6 661.487 12.2277  -2 
   0 -11   6 661.487 12.2277   1 
   3 -11   6 559.328 10.8334  -2 
   1 -11   6 559.328 10.8334   1 
   2 -11   6 390.054 8.48028  -2 
   2 -11   6 390.054 8.48028   1 
   1 -11   6 255.808 6.53672  -2 
   3 -11   6 255.808 6.53672   1 
   0 -11   6 350.271 8.04493  -2 
   4 -11   6 350.271 8.04493   1 
  -1 -11   6 188.207 4.62460  -2 
   5 -11   6 188.207 4.62460   1 
  -2 -11   6 152.907 7.79506  -2 
   6 -11   6 152.907 7.79506   1 
  -3 -11   6 255.523 10.9015  -2 
   7 -11   6 255.523 10.9015   1 
  -4 -10   6 261.654 7.50946   1 
  -3 -10   6 661.200 13.1424   1 
  -2 -10   6 614.359 12.1307   1 
  -1 -10   6 275.620 5.44010   1 
   0 -10   6 5.86232 1.16155   1 
   1 -10   6 17.3794 1.68141   1 
   2 -10   6 18.7841 1.73698   1 
   3 -10   6 474.894 7.84483   1 
   4 -10   6 391.469 6.82847   1 
   5 -10   6 396.102 7.02753   1 
   6 -10   6 508.078 10.7776   1 
   7 -10   6 171.908 5.83420   1 
   8 -10   6 13.5045 2.78622   1 
   8  -9   6 210.262 7.23953  -2 
  -5  -9   6 210.262 7.23953   1 
   7  -9   6 166.837 6.14812  -2 
  -4  -9   6 166.837 6.14812   1 
   6  -9   6 281.304 7.51510  -2 
  -3  -9   6 281.304 7.51510   1 
   5  -9   6 21.5210 3.88647  -2 
  -2  -9   6 21.5210 3.88647   1 
   4  -9   6 92.0529 5.39032  -2 
  -1  -9   6 92.0529 5.39032   1 
   3  -9   6 316.478 7.08915  -2 
   0  -9   6 316.478 7.08915   1 
   1  -9   6 387.439 11.1163   1 
   2  -9   6 352.596 5.88966   1 
   3  -9   6 293.341 5.33609   1 
  -1  -9   6 203.859 8.14800  -2 
   4  -9   6 203.859 8.14800   1 
   5  -9   6 24.3152 2.06752   1 
  -3  -9   6 456.216 14.9044  -2 
   6  -9   6 456.216 14.9044   1 
  -4  -9   6 387.172 9.41883  -2 
   7  -9   6 387.172 9.41883   1 
  -5  -9   6 336.813 9.00977  -2 
   8  -9   6 336.813 9.00977   1 
   8  -8   6 373.048 14.1408  -2 
  -6  -8   6 373.048 14.1408   1 
   7  -8   6 172.743 9.04808  -2 
  -5  -8   6 172.743 9.04808   1 
  -4  -8   6 342.612 8.18163   1 
  -3  -8   6 221.944 5.93274   1 
  -2  -8   6 38.4654 1.72654   1 
  -1  -8   6 1.62099 0.52657   1 
   0  -8   6 84.2651 2.06089   1 
   1  -8   6 95.4593 2.11355   1 
   2  -8   6 1113.92 14.0000   1 
   3  -8   6 1455.23 17.8109   1 
   4  -8   6 46.6619 1.85431   1 
   5  -8   6 0.51676 0.82393   1 
   6  -8   6 1.86364 1.03347   1 
  -5  -8   6 110.066 7.45283  -2 
   7  -8   6 110.066 7.45283   1 
  -6  -8   6 178.525 9.90954  -2 
   8  -8   6 178.525 9.90954   1 
   9  -8   6 21.7555 4.53672   1 
  -7  -7   6 123.490 5.17553   1 
  -6  -7   6 201.290 6.29917   1 
  -5  -7   6 143.813 4.99444   1 
  -4  -7   6 1.48765 0.88862   1 
  -3  -7   6 153.090 4.53413   1 
  -2  -7   6 1165.95 14.4097   1 
  -1  -7   6 2517.23 24.8565   1 
   0  -7   6 1231.04 14.8588   1 
   1  -7   6 430.395 5.44623   1 
   2  -7   6 32.4497 1.16706   1 
   3  -7   6 61.7810 1.94724   1 
   4  -7   6 63.2843 2.13928   1 
   5  -7   6 350.790 7.72080   1 
   6  -7   6 345.773 7.95070   1 
   7  -7   6 642.985 12.6090   1 
   8  -7   6 959.626 17.3462   1 
   9  -7   6 123.169 5.21359   1 
   8  -6   6 210.630 6.75307  -2 
  -7  -6   6 210.630 6.75307   1 
   7  -6   6 309.765 7.99882  -2 
  -6  -6   6 309.765 7.99882   1 
   6  -6   6 337.150 7.95117  -2 
  -5  -6   6 337.150 7.95117   1 
   5  -6   6 1415.51 22.2030  -2 
  -4  -6   6 1415.51 22.2030   1 
   4  -6   6 937.928 12.3671  -2 
  -3  -6   6 937.928 12.3671   1 
   3  -6   6 483.660 6.68963  -2 
  -2  -6   6 483.660 6.68963   1 
   2  -6   6 322.457 4.33059  -2 
  -1  -6   6 322.457 4.33059   1 
   1  -6   6 151.490 2.58892  -2 
   0  -6   6 151.490 2.58892   1 
   0  -6   6 344.005 5.23136  -2 
   1  -6   6 344.005 5.23136   1 
  -1  -6   6 724.616 8.09614  -2 
   2  -6   6 724.616 8.09614   1 
  -2  -6   6 1044.21 11.1464  -2 
   3  -6   6 1044.21 11.1464   1 
  -3  -6   6 1049.29 16.6917  -2 
   4  -6   6 1049.29 16.6917   1 
  -4  -6   6 941.194 15.6426  -2 
   5  -6   6 941.194 15.6426   1 
  -5  -6   6 310.504 7.40171  -2 
   6  -6   6 310.504 7.40171   1 
  -6  -6   6 142.318 4.99138  -2 
   7  -6   6 142.318 4.99138   1 
  -7  -6   6 314.620 8.21438  -2 
   8  -6   6 314.620 8.21438   1 
  -8  -6   6 308.164 8.46306  -2 
   9  -6   6 308.164 8.46306   1 
  -8  -5   6 243.268 7.18086   1 
  -7  -5   6 101.724 4.40816   1 
  -6  -5   6 41.0812 2.73635   1 
  -5  -5   6 149.436 4.65361   1 
  -4  -5   6 301.517 5.29184   1 
  -3  -5   6 137.149 3.05968   1 
  -2  -5   6 206.602 3.06346   1 
  -1  -5   6 413.398 5.04228   1 
   0  -5   6 130.967 2.20164   1 
   1  -5   6 27.5571 0.94648   1 
   2  -5   6 597.124 8.00311   1 
   3  -5   6 58.8084 1.80077   1 
   4  -5   6 403.052 6.21870   1 
   5  -5   6 499.009 9.65973   1 
   6  -5   6 442.295 9.24963   1 
   7  -5   6 94.3727 4.00035   1 
   8  -5   6 28.5733 2.52603   1 
   9  -5   6 19.9361 2.41647   1 
   9  -4   6 213.006 10.5393  -2 
  -9  -4   6 213.006 10.5393   1 
   8  -4   6 710.376 14.0519  -2 
  -8  -4   6 710.376 14.0519   1 
   7  -4   6 1038.65 18.0688  -2 
  -7  -4   6 1038.65 18.0688   1 
   6  -4   6 695.704 12.9047  -2 
  -6  -4   6 695.704 12.9047   1 
   5  -4   6 681.069 9.88694  -2 
  -5  -4   6 681.069 9.88694   1 
   4  -4   6 674.118 11.5426  -2 
  -4  -4   6 674.118 11.5426   1 
   3  -4   6 190.258 3.73100  -2 
  -3  -4   6 190.258 3.73100   1 
   2  -4   6 927.699 11.8100  -2 
  -2  -4   6 927.699 11.8100   1 
   1  -4   6 1591.83 15.8573  -2 
  -1  -4   6 1591.83 15.8573   1 
   0  -4   6 3591.47 34.2093  -2 
   0  -4   6 3591.47 34.2093   1 
  -1  -4   6 3545.87 33.8198  -2 
   1  -4   6 3545.87 33.8198   1 
  -2  -4   6 2062.32 23.6718  -2 
   2  -4   6 2062.32 23.6718   1 
  -3  -4   6 331.566 5.26803  -2 
   3  -4   6 331.566 5.26803   1 
  -4  -4   6 309.484 5.17450  -2 
   4  -4   6 309.484 5.17450   1 
  -5  -4   6 394.061 6.37890  -2 
   5  -4   6 394.061 6.37890   1 
  -6  -4   6 587.061 11.1466  -2 
   6  -4   6 587.061 11.1466   1 
  -7  -4   6 648.447 12.3834  -2 
   7  -4   6 648.447 12.3834   1 
  -8  -4   6 501.406 10.7000  -2 
   8  -4   6 501.406 10.7000   1 
  -9  -4   6 330.075 8.54298  -2 
   9  -4   6 330.075 8.54298   1 
 -10  -3   6 210.854 10.0253   1 
  -9  -3   6 55.6650 3.63943   1 
  -8  -3   6 215.740 6.42784   1 
  -7  -3   6 39.1307 2.18470   1 
  -6  -3   6 2.48773 0.83334   1 
  -5  -3   6 20.1313 1.43524   1 
  -4  -3   6 418.693 6.54504   1 
  -3  -3   6 2051.33 24.1419   1 
  -2  -3   6 3316.39 37.5479   1 
  -1  -3   6 1310.54 13.1452   1 
   0  -3   6 154.009 3.29518   1 
   1  -3   6 298.036 4.56227   1 
   2  -3   6 224.004 3.87581   1 
   3  -3   6 408.332 6.13605   1 
   4  -3   6 38.4719 1.64255   1 
   5  -3   6 548.266 8.22861   1 
   6  -3   6 656.850 9.72761   1 
   7  -3   6 581.260 11.4709   1 
   8  -3   6 268.555 7.23211   1 
   9  -3   6 4.81465 2.15440   1 
   8  -2   6 160.531 9.04901  -2 
  -9  -2   6 160.531 9.04901   1 
   7  -2   6 298.338 7.74843  -2 
  -8  -2   6 298.338 7.74843   1 
  -7  -2   6 408.895 7.18550   1 
  -6  -2   6 845.808 11.8662   1 
  -5  -2   6 496.034 7.63189   1 
  -4  -2   6 2.30102 0.60488   1 
  -3  -2   6 86.5090 2.22697   1 
  -2  -2   6 139.192 2.77995   1 
   0  -2   6 482.427 10.6761  -2 
  -1  -2   6 482.427 10.6761   1 
   0  -2   6 159.572 2.87699   1 
   1  -2   6 258.724 4.14834   1 
   2  -2   6 570.581 7.77131   1 
   3  -2   6 1004.01 12.6898   1 
   4  -2   6 588.535 8.46610   1 
   5  -2   6 19.2006 1.43835   1 
   6  -2   6 110.717 3.19617   1 
   7  -2   6 585.381 9.25130   1 
   8  -2   6 357.344 11.6769   1 
   7  -1   6 228.212 7.12425  -2 
  -9  -1   6 228.212 7.12425   1 
   6  -1   6 -0.1663 2.07393  -2 
  -8  -1   6 -0.1663 2.07393   1 
   5  -1   6 457.294 7.78646  -2 
  -7  -1   6 457.294 7.78646   1 
   4  -1   6 658.353 16.9318  -2 
  -6  -1   6 658.353 16.9318   1 
   3  -1   6 1672.19 20.5498  -2 
  -5  -1   6 1672.19 20.5498   1 
   2  -1   6 1635.95 33.9590  -2 
  -4  -1   6 1635.95 33.9590   1 
   1  -1   6 122.625 4.74204  -2 
  -3  -1   6 122.625 4.74204   1 
   0  -1   6 86.2654 3.56189  -2 
  -2  -1   6 86.2654 3.56189   1 
  -1  -1   6 174.062 4.55089  -2 
  -1  -1   6 174.062 4.55089   1 
  -2  -1   6 53.6215 2.00725  -2 
   0  -1   6 53.6215 2.00725   1 
  -3  -1   6 148.579 4.87048  -2 
   1  -1   6 148.579 4.87048   1 
  -4  -1   6 2388.25 32.7613  -2 
   2  -1   6 2388.25 32.7613   1 
  -5  -1   6 1809.78 21.3984  -2 
   3  -1   6 1809.78 21.3984   1 
  -6  -1   6 669.465 9.43793  -2 
   4  -1   6 669.465 9.43793   1 
  -7  -1   6 425.791 7.05490  -2 
   5  -1   6 425.791 7.05490   1 
  -8  -1   6 2.30829 2.13047  -2 
   6  -1   6 2.30829 2.13047   1 
  -9  -1   6 94.2390 4.31926  -2 
   7  -1   6 94.2390 4.31926   1 
 -10  -1   6 164.845 7.94242  -2 
   8  -1   6 164.845 7.94242   1 
 -10   0   6 113.494 5.08092   1 
  -9   0   6 532.532 11.6533   1 
  -8   0   6 682.377 13.3812   1 
  -7   0   6 399.536 7.03044   1 
  -6   0   6 249.777 4.88620   1 
  -5   0   6 441.711 6.95132   1 
  -4   0   6 544.028 9.41698   1 
  -3   0   6 6.95771 0.80565   1 
  -2   0   6 1091.03 11.2422   1 
  -1   0   6 997.320 10.3576   1 
   0   0   6 2377.25 26.8395   1 
   1   0   6 2925.06 32.8176   1 
   2   0   6 354.828 6.78614   1 
   3   0   6 4.32222 0.73986   1 
   4   0   6 101.491 2.79632   1 
   5   0   6 248.559 6.17951   1 
   6   0   6 241.222 6.32873   1 
   7   0   6 620.944 12.1419   1 
   8   0   6 493.368 15.4875   1 
   7   1   6 38.3242 4.98722  -2 
 -10   1   6 38.3242 4.98722   1 
   6   1   6 188.707 6.22254  -2 
  -9   1   6 188.707 6.22254   1 
   5   1   6 249.388 6.86017  -2 
  -8   1   6 249.388 6.86017   1 
   4   1   6 87.0850 3.70750  -2 
  -7   1   6 87.0850 3.70750   1 
   3   1   6 272.663 5.14851  -2 
  -6   1   6 272.663 5.14851   1 
   2   1   6 328.109 5.59778  -2 
  -5   1   6 328.109 5.59778   1 
   1   1   6 1425.23 21.6032  -2 
  -4   1   6 1425.23 21.6032   1 
   0   1   6 1098.87 11.4915  -2 
  -3   1   6 1098.87 11.4915   1 
  -1   1   6 716.145 7.90908  -2 
  -2   1   6 716.145 7.90908   1 
  -2   1   6 318.447 4.14731  -2 
  -1   1   6 318.447 4.14731   1 
  -3   1   6 621.708 8.28280  -2 
   0   1   6 621.708 8.28280   1 
  -4   1   6 642.301 8.66261  -2 
   1   1   6 642.301 8.66261   1 
  -5   1   6 370.450 5.82353  -2 
   2   1   6 370.450 5.82353   1 
  -6   1   6 459.842 8.71974  -2 
   3   1   6 459.842 8.71974   1 
  -7   1   6 114.624 3.87495  -2 
   4   1   6 114.624 3.87495   1 
  -8   1   6 357.347 7.95828  -2 
   5   1   6 357.347 7.95828   1 
  -9   1   6 381.724 8.66447  -2 
   6   1   6 381.724 8.66447   1 
 -10   1   6 47.1656 3.17273  -2 
   7   1   6 47.1656 3.17273   1 
 -10   2   6 42.7043 3.67843   1 
  -9   2   6 255.344 7.51381   1 
  -8   2   6 342.309 8.57674   1 
  -7   2   6 150.983 5.04186   1 
  -6   2   6 291.647 5.58279   1 
  -5   2   6 21.9838 1.39482   1 
  -4   2   6 1203.44 15.2031   1 
  -3   2   6 550.851 6.52731   1 
  -2   2   6 382.047 4.90624   1 
  -1   2   6 137.146 2.44678   1 
   0   2   6 5.93149 0.75328   1 
   1   2   6 123.685 2.84527   1 
   2   2   6 216.383 5.21254   1 
   3   2   6 41.3894 2.35731   1 
   4   2   6 43.8651 2.63382   1 
   5   2   6 336.330 7.95374   1 
   6   2   6 264.711 7.19581   1 
   5   3   6 15.5961 3.31024  -2 
  -9   3   6 15.5961 3.31024   1 
   4   3   6 548.343 11.9693  -2 
  -8   3   6 548.343 11.9693   1 
   3   3   6 1750.69 27.8236  -2 
  -7   3   6 1750.69 27.8236   1 
   2   3   6 1337.44 21.7755  -2 
  -6   3   6 1337.44 21.7755   1 
   1   3   6 1174.36 19.1772  -2 
  -5   3   6 1174.36 19.1772   1 
   0   3   6 768.528 10.5596  -2 
  -4   3   6 768.528 10.5596   1 
  -1   3   6 327.917 4.58548  -2 
  -3   3   6 327.917 4.58548   1 
  -2   3   6 90.6307 2.15074  -2 
  -2   3   6 90.6307 2.15074   1 
  -3   3   6 154.107 2.85491  -2 
  -1   3   6 154.107 2.85491   1 
  -4   3   6 552.659 9.65472  -2 
   0   3   6 552.659 9.65472   1 
  -5   3   6 1882.55 27.0933  -2 
   1   3   6 1882.55 27.0933   1 
  -6   3   6 2052.87 29.6636  -2 
   2   3   6 2052.87 29.6636   1 
  -7   3   6 1193.87 19.0687  -2 
   3   3   6 1193.87 19.0687   1 
  -8   3   6 436.226 9.38631  -2 
   4   3   6 436.226 9.38631   1 
  -9   3   6 12.8416 2.52723  -2 
   5   3   6 12.8416 2.52723   1 
   4   4   6 155.919 8.89063  -2 
  -9   4   6 155.919 8.89063   1 
   3   4   6 130.377 7.73198  -2 
  -8   4   6 130.377 7.73198   1 
  -7   4   6 84.8280 3.96079   1 
  -6   4   6 94.6120 3.92798   1 
  -5   4   6 3.40261 1.11583   1 
  -4   4   6 2.48278 0.67649   1 
  -3   4   6 231.992 3.75077   1 
  -2   4   6 1579.87 16.4748   1 
  -1   4   6 797.691 10.5563   1 
   0   4   6 464.014 8.73415   1 
   1   4   6 204.681 5.27808   1 
   2   4   6 11.4411 1.58758   1 
   3   4   6 42.6633 2.72012   1 
   4   4   6 49.4023 3.09271   1 
  -9   5   6 1.87783 2.53684   1 
  -8   5   6 48.0829 3.37628   1 
  -7   5   6 105.160 4.52486   1 
  -6   5   6 197.463 5.95528   1 
  -5   5   6 504.211 10.3863   1 
  -4   5   6 184.058 4.04672   1 
  -3   5   6 12.9051 1.27056   1 
  -2   5   6 51.3164 2.03701   1 
  -1   5   6 158.949 4.43362   1 
   0   5   6 210.541 5.44109   1 
   1   5   6 35.1230 2.34188   1 
   2   5   6 59.0853 3.12583   1 
   3   5   6 239.955 6.67127   1 
   2   6   6 288.115 8.51737  -2 
  -8   6   6 288.115 8.51737   1 
   1   6   6 12.1678 2.96912  -2 
  -7   6   6 12.1678 2.96912   1 
   0   6   6 150.625 5.67042  -2 
  -6   6   6 150.625 5.67042   1 
  -1   6   6 733.511 13.9722  -2 
  -5   6   6 733.511 13.9722   1 
  -2   6   6 706.290 12.5591  -2 
  -4   6   6 706.290 12.5591   1 
  -3   6   6 481.357 9.49834  -2 
  -3   6   6 481.357 9.49834   1 
  -4   6   6 383.530 11.2437  -2 
  -2   6   6 383.530 11.2437   1 
  -5   6   6 309.940 7.11426  -2 
  -1   6   6 309.940 7.11426   1 
  -6   6   6 94.6208 4.08077  -2 
   0   6   6 94.6208 4.08077   1 
  -7   6   6 17.1047 2.62982  -2 
   1   6   6 17.1047 2.62982   1 
  -8   6   6 327.540 8.29263  -2 
   2   6   6 327.540 8.29263   1 
  -7   7   6 329.964 8.84979   1 
  -6   7   6 195.453 8.84003   1 
  -5   7   6 259.639 10.0239   1 
  -4   7   6 179.770 5.40883   1 
  -3   7   6 18.1307 2.02887   1 
  -2   7   6 -0.6415 1.22399   1 
  -1   7   6 59.3391 4.38210   1 
   0   7   6 529.122 10.7431   1 
   1   7   6 843.842 22.1498   1 
  -2   8   6 212.446 9.43942  -2 
  -5   8   6 212.446 9.43942   1 
  -3   8   6 391.976 9.02473  -2 
  -4   8   6 391.976 9.02473   1 
  -4   8   6 441.351 13.2857  -2 
  -3   8   6 441.351 13.2857   1 
   0 -13   7 59.4232 5.58572   1 
   1 -13   7 357.160 12.0473   1 
   2 -13   7 409.280 9.58699   1 
   4 -13   7 212.874 9.18771   1 
   5 -12   7 379.146 13.1996  -2 
  -1 -12   7 379.146 13.1996   1 
   4 -12   7 303.397 7.74267  -2 
   0 -12   7 303.397 7.74267   1 
   3 -12   7 119.761 4.77133  -2 
   1 -12   7 119.761 4.77133   1 
   2 -12   7 2.41590 2.18247  -2 
   2 -12   7 2.41590 2.18247   1 
   1 -12   7 241.469 6.71632  -2 
   3 -12   7 241.469 6.71632   1 
   0 -12   7 266.341 10.2046  -2 
   4 -12   7 266.341 10.2046   1 
  -3 -11   7 43.1989 3.14911   1 
  -2 -11   7 305.916 7.90172   1 
   0 -11   7 219.756 5.87636   1 
   1 -11   7 20.6762 1.93474   1 
   2 -11   7 61.9303 2.99489   1 
   3 -11   7 72.2432 3.24891   1 
   4 -11   7 15.2988 1.66967   1 
   5 -11   7 8.54378 1.59430   1 
   6 -11   7 38.0599 2.79746   1 
   7 -11   7 102.831 6.89810   1 
   7 -10   7 437.706 10.3194  -2 
  -4 -10   7 437.706 10.3194   1 
   6 -10   7 753.390 14.5735  -2 
  -3 -10   7 753.390 14.5735   1 
   5 -10   7 472.815 10.1316  -2 
  -2 -10   7 472.815 10.1316   1 
   4 -10   7 415.404 8.97100  -2 
  -1 -10   7 415.404 8.97100   1 
   3 -10   7 337.992 7.32363  -2 
   0 -10   7 337.992 7.32363   1 
   2 -10   7 165.671 4.70167  -2 
   1 -10   7 165.671 4.70167   1 
   1 -10   7 344.058 7.40069  -2 
   2 -10   7 344.058 7.40069   1 
   0 -10   7 733.852 10.5401  -2 
   3 -10   7 733.852 10.5401   1 
  -1 -10   7 866.780 15.0908  -2 
   4 -10   7 866.780 15.0908   1 
  -2 -10   7 705.002 13.1798  -2 
   5 -10   7 705.002 13.1798   1 
  -3 -10   7 514.068 10.8875  -2 
   6 -10   7 514.068 10.8875   1 
  -4 -10   7 203.308 6.42032  -2 
   7 -10   7 203.308 6.42032   1 
  -5  -9   7 44.2573 3.24982   1 
  -4  -9   7 88.9470 4.07980   1 
  -3  -9   7 17.7247 1.94651   1 
  -2  -9   7 15.7986 1.85163   1 
  -1  -9   7 263.301 4.97070   1 
   0  -9   7 364.381 6.07315   1 
   1  -9   7 322.491 5.51576   1 
   2  -9   7 868.105 11.6551   1 
   3  -9   7 217.306 5.34802   1 
   4  -9   7 49.0112 2.65867   1 
   5  -9   7 87.6794 3.66543   1 
   6  -9   7 146.456 5.02998   1 
   7  -9   7 214.446 6.56437   1 
   8  -9   7 310.960 8.64903   1 
   8  -8   7 136.644 5.79908  -2 
  -6  -8   7 136.644 5.79908   1 
   7  -8   7 119.979 5.11974  -2 
  -5  -8   7 119.979 5.11974   1 
   6  -8   7 45.6250 3.34822  -2 
  -4  -8   7 45.6250 3.34822   1 
   5  -8   7 346.390 8.04158  -2 
  -3  -8   7 346.390 8.04158   1 
   4  -8   7 545.863 10.4404  -2 
  -2  -8   7 545.863 10.4404   1 
   3  -8   7 195.930 5.16777  -2 
  -1  -8   7 195.930 5.16777   1 
   2  -8   7 132.158 5.66250  -2 
   0  -8   7 132.158 5.66250   1 
   1  -8   7 324.586 4.64823   1 
   2  -8   7 228.875 4.30031   1 
  -1  -8   7 220.421 8.16187  -2 
   3  -8   7 220.421 8.16187   1 
  -2  -8   7 449.220 13.5700  -2 
   4  -8   7 449.220 13.5700   1 
  -3  -8   7 250.248 6.54739  -2 
   5  -8   7 250.248 6.54739   1 
  -4  -8   7 23.0746 2.70436  -2 
   6  -8   7 23.0746 2.70436   1 
  -5  -8   7 57.1635 3.83340  -2 
   7  -8   7 57.1635 3.83340   1 
  -6  -8   7 59.1368 4.13494  -2 
   8  -8   7 59.1368 4.13494   1 
  -7  -7   7 328.097 8.81015   1 
  -6  -7   7 124.135 4.94437   1 
  -5  -7   7 19.8644 2.19296   1 
  -4  -7   7 145.325 4.69926   1 
  -3  -7   7 1916.52 28.7561   1 
  -2  -7   7 1218.31 15.5204   1 
  -1  -7   7 604.163 7.22563   1 
   0  -7   7 571.396 6.89528   1 
   1  -7   7 20.6766 1.44809   1 
   2  -7   7 0.84817 0.37070   1 
   3  -7   7 58.2207 2.55511   1 
   4  -7   7 153.612 4.56349   1 
   5  -7   7 52.0658 2.77581   1 
   6  -7   7 408.197 9.07812   1 
   7  -7   7 668.140 13.1446   1 
   8  -7   7 249.289 7.28461   1 
  -8  -6   7 25.8368 3.47612   1 
  -7  -6   7 328.088 8.60340   1 
  -6  -6   7 792.888 14.8789   1 
  -5  -6   7 335.671 7.86790   1 
  -4  -6   7 557.685 10.7476   1 
  -3  -6   7 531.793 7.97821   1 
  -2  -6   7 180.120 3.65142   1 
  -1  -6   7 0.43386 0.33546   1 
   0  -6   7 47.3504 1.57305   1 
   1  -6   7 119.430 2.23361   1 
   2  -6   7 1513.58 18.0829   1 
   3  -6   7 2168.81 25.2698   1 
   4  -6   7 1141.28 18.2271   1 
   5  -6   7 515.262 10.2174   1 
   6  -6   7 14.3915 1.86510   1 
   7  -6   7 123.197 4.74657   1 
   8  -6   7 229.590 6.90246   1 
   8  -5   7 79.7573 4.46424  -2 
  -8  -5   7 79.7573 4.46424   1 
   7  -5   7 97.1661 4.51286  -2 
  -7  -5   7 97.1661 4.51286   1 
   6  -5   7 145.762 5.05115  -2 
  -6  -5   7 145.762 5.05115   1 
   5  -5   7 59.1778 2.46870  -2 
  -5  -5   7 59.1778 2.46870   1 
   4  -5   7 247.427 5.73263  -2 
  -4  -5   7 247.427 5.73263   1 
   3  -5   7 290.462 5.12159  -2 
  -3  -5   7 290.462 5.12159   1 
   2  -5   7 94.0559 2.49115  -2 
  -2  -5   7 94.0559 2.49115   1 
   1  -5   7 1528.50 15.5136  -2 
  -1  -5   7 1528.50 15.5136   1 
   0  -5   7 870.726 9.41239  -2 
   0  -5   7 870.726 9.41239   1 
  -1  -5   7 729.041 8.08743  -2 
   1  -5   7 729.041 8.08743   1 
  -2  -5   7 67.0513 2.04794  -2 
   2  -5   7 67.0513 2.04794   1 
  -3  -5   7 585.063 8.28429  -2 
   3  -5   7 585.063 8.28429   1 
  -4  -5   7 298.989 5.26623  -2 
   4  -5   7 298.989 5.26623   1 
  -5  -5   7 117.998 4.19495  -2 
   5  -5   7 117.998 4.19495   1 
  -6  -5   7 290.514 7.27460  -2 
   6  -5   7 290.514 7.27460   1 
  -7  -5   7 163.429 5.59353  -2 
   7  -5   7 163.429 5.59353   1 
  -8  -5   7 124.327 5.12255  -2 
   8  -5   7 124.327 5.12255   1 
  -9  -4   7 70.6041 4.96214   1 
  -8  -4   7 327.751 8.50551   1 
  -7  -4   7 376.582 8.86040   1 
  -6  -4   7 97.9503 3.10483   1 
  -5  -4   7 316.727 5.78197   1 
  -4  -4   7 497.731 7.61781   1 
  -3  -4   7 1.22546 0.53401   1 
  -2  -4   7 338.110 4.40555   1 
  -1  -4   7 454.969 5.42769   1 
   0  -4   7 208.593 3.64521   1 
   1  -4   7 707.130 9.26082   1 
   2  -4   7 632.000 8.60221   1 
   3  -4   7 89.2516 2.41513   1 
   4  -4   7 110.680 2.86621   1 
   5  -4   7 18.9657 1.45226   1 
   6  -4   7 80.3973 3.60551   1 
   7  -4   7 9.22748 1.76057   1 
   8  -4   7 332.974 8.46936   1 
   9  -4   7 410.074 14.7572   1 
   8  -3   7 233.260 7.27012  -2 
  -9  -3   7 233.260 7.27012   1 
   7  -3   7 679.269 13.3998  -2 
  -8  -3   7 679.269 13.3998   1 
   6  -3   7 853.744 12.4407  -2 
  -7  -3   7 853.744 12.4407   1 
   5  -3   7 277.346 5.46361  -2 
  -6  -3   7 277.346 5.46361   1 
   4  -3   7 377.705 6.45353  -2 
  -5  -3   7 377.705 6.45353   1 
   3  -3   7 1274.07 16.1866  -2 
  -4  -3   7 1274.07 16.1866   1 
   2  -3   7 3243.03 46.1618  -2 
  -3  -3   7 3243.03 46.1618   1 
   1  -3   7 2377.85 27.6421  -2 
  -2  -3   7 2377.85 27.6421   1 
   0  -3   7 864.458 9.22136  -2 
  -1  -3   7 864.458 9.22136   1 
  -1  -3   7 387.515 5.65794  -2 
   0  -3   7 387.515 5.65794   1 
  -2  -3   7 1066.67 13.1550  -2 
   1  -3   7 1066.67 13.1550   1 
  -3  -3   7 1649.22 19.5578  -2 
   2  -3   7 1649.22 19.5578   1 
  -4  -3   7 1252.98 15.5601  -2 
   3  -3   7 1252.98 15.5601   1 
  -5  -3   7 583.013 8.55302  -2 
   4  -3   7 583.013 8.55302   1 
  -6  -3   7 545.265 8.39892  -2 
   5  -3   7 545.265 8.39892   1 
  -7  -3   7 1234.12 16.2629  -2 
   6  -3   7 1234.12 16.2629   1 
  -8  -3   7 558.895 11.3346  -2 
   7  -3   7 558.895 11.3346   1 
  -9  -3   7 116.567 6.36671  -2 
   8  -3   7 116.567 6.36671   1 
  -9  -2   7 35.3046 3.28056   1 
  -8  -2   7 382.274 7.30088   1 
  -7  -2   7 461.081 7.96490   1 
  -6  -2   7 453.779 7.58331   1 
  -5  -2   7 457.673 7.34100   1 
  -4  -2   7 31.6632 1.56434   1 
  -3  -2   7 4.22357 0.67817   1 
  -2  -2   7 19.7331 1.09081   1 
  -1  -2   7 167.618 2.54771   1 
   0  -2   7 53.4028 1.63350   1 
   1  -2   7 259.451 5.21345   1 
   2  -2   7 1917.54 22.4521   1 
   3  -2   7 1043.91 13.3855   1 
   4  -2   7 124.799 3.16745   1 
   5  -2   7 17.2713 1.47177   1 
   6  -2   7 72.6750 2.74521   1 
   7  -2   7 186.735 5.61775   1 
   8  -2   7 422.549 14.3056   1 
   8  -1   7 246.070 11.9897  -2 
 -10  -1   7 246.070 11.9897   1 
   7  -1   7 24.6767 3.78675  -2 
  -9  -1   7 24.6767 3.78675   1 
   6  -1   7 7.87147 2.87364  -2 
  -8  -1   7 7.87147 2.87364   1 
   5  -1   7 262.120 7.05648  -2 
  -7  -1   7 262.120 7.05648   1 
   4  -1   7 601.173 15.7147  -2 
  -6  -1   7 601.173 15.7147   1 
  -5  -1   7 61.4756 2.22678   1 
  -4  -1   7 274.434 6.04668   1 
  -3  -1   7 708.500 9.63931   1 
  -2  -1   7 336.034 4.26307   1 
  -1  -1   7 752.613 15.0548  -2 
  -1  -1   7 752.613 15.0548   1 
  -2  -1   7 238.183 6.44397  -2 
   0  -1   7 238.183 6.44397   1 
   1  -1   7 267.798 4.51251   1 
   2  -1   7 352.179 5.64376   1 
   3  -1   7 457.558 7.03680   1 
  -6  -1   7 801.490 13.9102  -2 
   4  -1   7 801.490 13.9102   1 
  -7  -1   7 242.129 9.01830  -2 
   5  -1   7 242.129 9.01830   1 
  -8  -1   7 5.70750 2.42773  -2 
   6  -1   7 5.70750 2.42773   1 
  -9  -1   7 16.7502 3.05882  -2 
   7  -1   7 16.7502 3.05882   1 
 -10  -1   7 96.2688 7.45482  -2 
   8  -1   7 96.2688 7.45482   1 
   7   0   7 380.356 14.5286  -2 
 -10   0   7 380.356 14.5286   1 
   6   0   7 290.109 8.28291  -2 
  -9   0   7 290.109 8.28291   1 
   5   0   7 513.415 11.3134  -2 
  -8   0   7 513.415 11.3134   1 
   4   0   7 672.082 13.1536  -2 
  -7   0   7 672.082 13.1536   1 
   3   0   7 216.438 4.72503  -2 
  -6   0   7 216.438 4.72503   1 
   2   0   7 312.176 6.76769  -2 
  -5   0   7 312.176 6.76769   1 
   1   0   7 191.262 6.80432  -2 
  -4   0   7 191.262 6.80432   1 
   0   0   7 1045.36 22.6790  -2 
  -3   0   7 1045.36 22.6790   1 
  -1   0   7 2535.74 49.4777  -2 
  -2   0   7 2535.74 49.4777   1 
  -1   0   7 2668.07 25.9623   1 
  -3   0   7 1127.73 22.5674  -2 
   0   0   7 1127.73 22.5674   1 
  -4   0   7 381.823 6.00147  -2 
   1   0   7 381.823 6.00147   1 
  -5   0   7 213.800 4.25386  -2 
   2   0   7 213.800 4.25386   1 
  -6   0   7 222.032 5.59152  -2 
   3   0   7 222.032 5.59152   1 
  -7   0   7 304.325 7.08561  -2 
   4   0   7 304.325 7.08561   1 
  -8   0   7 230.302 6.32021  -2 
   5   0   7 230.302 6.32021   1 
  -9   0   7 331.094 8.19548  -2 
   6   0   7 331.094 8.19548   1 
 -10   0   7 539.754 16.8891  -2 
   7   0   7 539.754 16.8891   1 
 -10   1   7 163.818 10.1272   1 
  -9   1   7 216.605 7.01796   1 
  -8   1   7 128.486 4.94316   1 
  -7   1   7 3.24001 1.25412   1 
  -6   1   7 169.726 3.97971   1 
  -5   1   7 615.976 9.08723   1 
  -4   1   7 1029.76 13.4536   1 
  -3   1   7 907.517 11.9307   1 
  -2   1   7 627.344 7.26695   1 
  -1   1   7 56.5256 1.59745   1 
   0   1   7 15.8790 1.11623   1 
   1   1   7 65.8375 2.07892   1 
   2   1   7 560.345 8.24063   1 
   3   1   7 850.367 14.3031   1 
   4   1   7 882.743 15.1617   1 
   5   1   7 657.420 12.5653   1 
   6   1   7 197.539 6.12553   1 
   5   2   7 380.619 9.77874  -2 
  -9   2   7 380.619 9.77874   1 
   4   2   7 392.002 9.49158  -2 
  -8   2   7 392.002 9.49158   1 
   3   2   7 184.703 5.83191  -2 
  -7   2   7 184.703 5.83191   1 
   2   2   7 66.1705 3.36728  -2 
  -6   2   7 66.1705 3.36728   1 
   1   2   7 149.969 3.58967  -2 
  -5   2   7 149.969 3.58967   1 
   0   2   7 269.292 4.95566  -2 
  -4   2   7 269.292 4.95566   1 
  -1   2   7 142.275 3.26453  -2 
  -3   2   7 142.275 3.26453   1 
  -2   2   7 103.596 2.23231  -2 
  -2   2   7 103.596 2.23231   1 
  -3   2   7 174.816 3.55412  -2 
  -1   2   7 174.816 3.55412   1 
  -4   2   7 217.950 4.13297  -2 
   0   2   7 217.950 4.13297   1 
  -5   2   7 313.556 6.64697  -2 
   1   2   7 313.556 6.64697   1 
  -6   2   7 78.9894 3.23825  -2 
   2   2   7 78.9894 3.23825   1 
  -7   2   7 92.9117 3.70924  -2 
   3   2   7 92.9117 3.70924   1 
  -8   2   7 200.928 5.86165  -2 
   4   2   7 200.928 5.86165   1 
  -9   2   7 393.923 9.15803  -2 
   5   2   7 393.923 9.15803   1 
  -9   3   7 90.4373 4.61360   1 
  -8   3   7 307.423 8.28858   1 
  -7   3   7 550.278 11.5637   1 
  -6   3   7 450.071 9.68069   1 
  -5   3   7 243.342 6.26822   1 
  -4   3   7 281.139 5.18611   1 
  -3   3   7 161.432 2.99274   1 
  -2   3   7 0.39020 0.46252   1 
  -1   3   7 1.03795 0.62780   1 
   0   3   7 99.7377 3.38023   1 
   1   3   7 932.833 15.1865   1 
   2   3   7 609.360 11.3271   1 
   3   3   7 217.136 5.99479   1 
   4   3   7 22.8385 2.41572   1 
   3   4   7 418.439 10.3694  -2 
  -8   4   7 418.439 10.3694   1 
   2   4   7 134.299 5.31630  -2 
  -7   4   7 134.299 5.31630   1 
   1   4   7 142.729 5.17457  -2 
  -6   4   7 142.729 5.17457   1 
   0   4   7 90.1116 4.02146  -2 
  -5   4   7 90.1116 4.02146   1 
  -1   4   7 967.290 16.5144  -2 
  -4   4   7 967.290 16.5144   1 
  -2   4   7 2079.56 21.3607  -2 
  -3   4   7 2079.56 21.3607   1 
  -3   4   7 2303.42 32.3866  -2 
  -2   4   7 2303.42 32.3866   1 
  -4   4   7 1376.59 20.7659  -2 
  -1   4   7 1376.59 20.7659   1 
  -5   4   7 125.805 4.21789  -2 
   0   4   7 125.805 4.21789   1 
  -6   4   7 97.2471 3.90851  -2 
   1   4   7 97.2471 3.90851   1 
  -7   4   7 71.8130 3.69136  -2 
   2   4   7 71.8130 3.69136   1 
  -8   4   7 385.533 8.96472  -2 
   3   4   7 385.533 8.96472   1 
  -8   5   7 71.5993 6.20148   1 
  -7   5   7 190.808 6.28119   1 
  -6   5   7 209.388 6.31401   1 
  -5   5   7 274.255 7.12261   1 
  -4   5   7 105.510 5.89092   1 
  -3   5   7 15.2010 1.68299   1 
  -2   5   7 11.5207 1.54290   1 
  -1   5   7 11.5881 1.58465   1 
   0   5   7 3.65309 1.15179   1 
   1   5   7 111.562 4.19075   1 
   2   5   7 269.968 7.16510   1 
  -7   6   7 24.7855 2.83143   1 
  -6   6   7 170.418 5.87560   1 
  -5   6   7 117.843 6.45338   1 
  -4   6   7 201.428 8.29080   1 
  -3   6   7 156.319 6.62207   1 
  -2   6   7 84.8548 4.94235   1 
  -1   6   7 30.7822 2.42158   1 
   0   6   7 23.8961 2.30716   1 
   1   6   7 4.56878 2.21684   1 
  -2   7   7 201.375 9.44980  -2 
  -5   7   7 201.375 9.44980   1 
  -4   7   7 14.7113 3.79129  -2 
  -3   7   7 14.7113 3.79129   1 
  -5   7   7 147.423 7.33053  -2 
  -2   7   7 147.423 7.33053   1 
   1 -13   8 293.801 10.5871   1 
   2 -13   8 351.138 8.55790   1 
  -1 -12   8 607.124 17.5538   1 
   0 -12   8 109.183 6.23651   1 
   1 -12   8 4.68674 1.32998   1 
   2 -12   8 12.9615 1.80722   1 
   3 -12   8 88.1209 5.44241   1 
   4 -12   8 100.117 5.84242   1 
   5 -12   8 163.618 9.32900   1 
   6 -12   8 240.148 10.6682   1 
   6 -11   8 51.2285 4.03753  -2 
  -3 -11   8 51.2285 4.03753   1 
   5 -11   8 172.060 6.09797  -2 
  -2 -11   8 172.060 6.09797   1 
   4 -11   8 136.811 7.02713  -2 
  -1 -11   8 136.811 7.02713   1 
   3 -11   8 220.801 8.83127  -2 
   0 -11   8 220.801 8.83127   1 
   2 -11   8 101.021 4.06777  -2 
   1 -11   8 101.021 4.06777   1 
   1 -11   8 41.5387 2.89418  -2 
   2 -11   8 41.5387 2.89418   1 
  -1 -11   8 201.656 6.06469  -2 
   4 -11   8 201.656 6.06469   1 
  -2 -11   8 72.0497 3.96862  -2 
   5 -11   8 72.0497 3.96862   1 
  -3 -11   8 51.3281 5.90879  -2 
   6 -11   8 51.3281 5.90879   1 
  -4 -10   8 192.195 6.25507   1 
  -3 -10   8 216.642 9.32591   1 
  -2 -10   8 34.5320 2.64464   1 
  -1 -10   8 0.40812 0.90507   1 
   0 -10   8 42.2960 3.23369   1 
   1 -10   8 23.7420 1.88014   1 
   2 -10   8 196.158 4.27195   1 
   3 -10   8 879.386 15.0425   1 
   4 -10   8 622.195 11.8931   1 
   5 -10   8 325.207 7.91380   1 
   6 -10   8 116.117 4.71798   1 
   7 -10   8 14.2529 2.19984   1 
   7  -9   8 203.562 6.59598  -2 
  -5  -9   8 203.562 6.59598   1 
   6  -9   8 79.9931 3.92324  -2 
  -4  -9   8 79.9931 3.92324   1 
   5  -9   8 72.0633 3.44171  -2 
  -3  -9   8 72.0633 3.44171   1 
   4  -9   8 272.080 6.69202  -2 
  -2  -9   8 272.080 6.69202   1 
   3  -9   8 1033.12 17.0916  -2 
  -1  -9   8 1033.12 17.0916   1 
   2  -9   8 1766.58 18.5806  -2 
   0  -9   8 1766.58 18.5806   1 
   1  -9   8 981.708 12.8964  -2 
   1  -9   8 981.708 12.8964   1 
   0  -9   8 985.406 13.0108  -2 
   2  -9   8 985.406 13.0108   1 
  -1  -9   8 471.306 9.30661  -2 
   3  -9   8 471.306 9.30661   1 
  -2  -9   8 265.246 6.60472  -2 
   4  -9   8 265.246 6.60472   1 
  -3  -9   8 119.402 4.40657  -2 
   5  -9   8 119.402 4.40657   1 
  -4  -9   8 67.4984 3.51409  -2 
   6  -9   8 67.4984 3.51409   1 
  -5  -9   8 331.689 8.59211  -2 
   7  -9   8 331.689 8.59211   1 
  -6  -8   8 1.21317 1.31843   1 
  -5  -8   8 34.9379 2.72056   1 
  -4  -8   8 420.184 9.29018   1 
  -3  -8   8 488.115 9.95767   1 
  -2  -8   8 69.5936 2.98260   1 
  -1  -8   8 56.0586 2.56019   1 
   0  -8   8 6.65488 0.85640   1 
   1  -8   8 94.0994 2.18357   1 
   2  -8   8 105.400 3.46888   1 
   3  -8   8 207.968 5.36796   1 
   4  -8   8 153.023 4.71623   1 
   5  -8   8 280.432 7.03163   1 
   6  -8   8 252.477 6.98100   1 
   7  -8   8 83.6275 4.13441   1 
   7  -7   8 207.865 6.78285  -2 
  -6  -7   8 207.865 6.78285   1 
   6  -7   8 248.056 7.04315  -2 
  -5  -7   8 248.056 7.04315   1 
   5  -7   8 215.276 6.18305  -2 
  -4  -7   8 215.276 6.18305   1 
   4  -7   8 745.704 13.3040  -2 
  -3  -7   8 745.704 13.3040   1 
   3  -7   8 712.126 12.4158  -2 
  -2  -7   8 712.126 12.4158   1 
   2  -7   8 343.111 7.06151  -2 
  -1  -7   8 343.111 7.06151   1 
   1  -7   8 65.4990 2.58401  -2 
   0  -7   8 65.4990 2.58401   1 
   0  -7   8 35.9360 1.70369  -2 
   1  -7   8 35.9360 1.70369   1 
  -1  -7   8 256.699 5.93399  -2 
   2  -7   8 256.699 5.93399   1 
  -2  -7   8 301.129 6.76093  -2 
   3  -7   8 301.129 6.76093   1 
  -3  -7   8 502.273 9.87564  -2 
   4  -7   8 502.273 9.87564   1 
  -4  -7   8 402.169 8.95615  -2 
   5  -7   8 402.169 8.95615   1 
  -5  -7   8 570.808 11.7883  -2 
   6  -7   8 570.808 11.7883   1 
  -6  -7   8 368.608 9.22832  -2 
   7  -7   8 368.608 9.22832   1 
  -7  -6   8 736.441 14.6511   1 
  -6  -6   8 1159.69 19.9235   1 
  -5  -6   8 710.911 13.3541   1 
  -4  -6   8 284.048 5.41176   1 
  -3  -6   8 81.1038 2.52680   1 
  -2  -6   8 59.6369 2.04710   1 
  -1  -6   8 0.73904 0.36420   1 
   0  -6   8 128.656 3.41461   1 
   1  -6   8 291.180 4.91740   1 
   2  -6   8 1638.73 19.6845   1 
   3  -6   8 1325.92 16.5377   1 
   4  -6   8 223.534 5.78261   1 
   5  -6   8 89.2502 3.66063   1 
   6  -6   8 59.4542 3.22495   1 
   7  -6   8 149.536 5.44281   1 
   8  -6   8 173.156 6.10359   1 
  -8  -5   8 38.1616 3.29907   1 
  -7  -5   8 58.8449 3.56583   1 
  -6  -5   8 49.5433 3.03697   1 
  -5  -5   8 40.1410 2.01778   1 
  -4  -5   8 122.851 3.20156   1 
  -3  -5   8 183.275 3.88250   1 
  -2  -5   8 1926.97 23.1006   1 
  -1  -5   8 1924.15 19.2801   1 
   0  -5   8 1207.85 12.7576   1 
   1  -5   8 249.175 4.41848   1 
   2  -5   8 9.45536 0.98482   1 
   3  -5   8 27.6914 1.47975   1 
   4  -5   8 432.115 7.00508   1 
   5  -5   8 232.690 5.35643   1 
   6  -5   8 44.3928 2.87405   1 
   7  -5   8 424.665 9.76239   1 
   8  -5   8 491.006 11.2243   1 
   8  -4   8 45.3122 6.30350  -2 
  -9  -4   8 45.3122 6.30350   1 
   7  -4   8 76.3921 4.39571  -2 
  -8  -4   8 76.3921 4.39571   1 
   6  -4   8 208.027 5.18141  -2 
  -7  -4   8 208.027 5.18141   1 
   5  -4   8 406.939 7.31175  -2 
  -6  -4   8 406.939 7.31175   1 
   4  -4   8 310.633 5.88386  -2 
  -5  -4   8 310.633 5.88386   1 
   3  -4   8 399.508 6.69509  -2 
  -4  -4   8 399.508 6.69509   1 
   2  -4   8 46.5642 1.98704  -2 
  -3  -4   8 46.5642 1.98704   1 
   1  -4   8 340.830 5.57785  -2 
  -2  -4   8 340.830 5.57785   1 
   0  -4   8 737.439 8.23284  -2 
  -1  -4   8 737.439 8.23284   1 
  -1  -4   8 1257.23 15.3337  -2 
   0  -4   8 1257.23 15.3337   1 
  -2  -4   8 385.593 6.02037  -2 
   1  -4   8 385.593 6.02037   1 
  -3  -4   8 26.4721 1.60661  -2 
   2  -4   8 26.4721 1.60661   1 
  -4  -4   8 247.662 4.73742  -2 
   3  -4   8 247.662 4.73742   1 
  -5  -4   8 326.273 5.87449  -2 
   4  -4   8 326.273 5.87449   1 
  -6  -4   8 308.190 5.85223  -2 
   5  -4   8 308.190 5.85223   1 
  -7  -4   8 98.1353 4.15044  -2 
   6  -4   8 98.1353 4.15044   1 
  -8  -4   8 181.430 6.04059  -2 
   7  -4   8 181.430 6.04059   1 
  -9  -4   8 89.3906 7.12573  -2 
   8  -4   8 89.3906 7.12573   1 
  -9  -3   8 397.933 9.92836   1 
  -8  -3   8 253.043 5.85905   1 
  -7  -3   8 46.4026 2.47385   1 
  -6  -3   8 174.116 4.31024   1 
  -5  -3   8 764.323 11.0084   1 
  -4  -3   8 771.978 10.8213   1 
  -3  -3   8 805.164 13.6168   1 
  -2  -3   8 380.209 5.94219   1 
  -1  -3   8 48.5101 1.30220   1 
   0  -3   8 41.0953 1.54468   1 
   1  -3   8 213.966 4.75921   1 
   2  -3   8 91.0683 2.50883   1 
   3  -3   8 1240.12 15.7129   1 
   4  -3   8 743.840 10.5887   1 
   5  -3   8 656.676 9.89404   1 
   6  -3   8 633.358 9.90607   1 
   7  -3   8 96.6506 4.28992   1 
   7  -2   8 243.032 7.29723  -2 
  -9  -2   8 243.032 7.29723   1 
   6  -2   8 498.852 8.76685  -2 
  -8  -2   8 498.852 8.76685   1 
   5  -2   8 1131.10 15.5930  -2 
  -7  -2   8 1131.10 15.5930   1 
   4  -2   8 663.796 10.1326  -2 
  -6  -2   8 663.796 10.1326   1 
   3  -2   8 627.549 9.42903  -2 
  -5  -2   8 627.549 9.42903   1 
   2  -2   8 757.446 10.6181  -2 
  -4  -2   8 757.446 10.6181   1 
   1  -2   8 384.921 6.19691  -2 
  -3  -2   8 384.921 6.19691   1 
   0  -2   8 815.663 10.8135  -2 
  -2  -2   8 815.663 10.8135   1 
  -1  -2   8 636.836 8.49615  -2 
  -1  -2   8 636.836 8.49615   1 
  -2  -2   8 1894.55 22.1429  -2 
   0  -2   8 1894.55 22.1429   1 
  -3  -2   8 866.159 11.3123  -2 
   1  -2   8 866.159 11.3123   1 
  -4  -2   8 1020.66 13.1615  -2 
   2  -2   8 1020.66 13.1615   1 
  -5  -2   8 671.046 9.57699  -2 
   3  -2   8 671.046 9.57699   1 
  -6  -2   8 301.321 5.59116  -2 
   4  -2   8 301.321 5.59116   1 
  -7  -2   8 559.230 8.84879  -2 
   5  -2   8 559.230 8.84879   1 
  -8  -2   8 356.791 6.78597  -2 
   6  -2   8 356.791 6.78597   1 
  -9  -2   8 265.260 7.17967  -2 
   7  -2   8 265.260 7.17967   1 
  -9  -1   8 2.81514 1.57019   1 
  -8  -1   8 4.34992 1.23225   1 
  -7  -1   8 17.0403 2.11332   1 
  -6  -1   8 2.36841 0.83164   1 
  -5  -1   8 5.47508 0.93937   1 
  -4  -1   8 216.771 4.41269   1 
  -3  -1   8 565.930 8.26112   1 
  -2  -1   8 610.136 8.58179   1 
  -1  -1   8 322.534 5.10220   1 
   0  -1   8 184.853 3.59967   1 
   1  -1   8 1.43187 0.59481   1 
   2  -1   8 577.247 8.43248   1 
   3  -1   8 165.845 3.80105   1 
   4  -1   8 17.2474 1.45364   1 
   5  -1   8 124.869 4.44556   1 
   6  -1   8 129.993 4.81831   1 
   7  -1   8 113.070 6.95397   1 
   6   0   8 297.977 8.67520  -2 
  -9   0   8 297.977 8.67520   1 
   5   0   8 277.566 8.01088  -2 
  -8   0   8 277.566 8.01088   1 
   4   0   8 443.435 7.91753  -2 
  -7   0   8 443.435 7.91753   1 
   3   0   8 426.214 7.40784  -2 
  -6   0   8 426.214 7.40784   1 
   2   0   8 234.300 5.87069  -2 
  -5   0   8 234.300 5.87069   1 
   1   0   8 56.5394 2.78764  -2 
  -4   0   8 56.5394 2.78764   1 
   0   0   8 780.163 12.8816  -2 
  -3   0   8 780.163 12.8816   1 
  -2   0   8 1252.77 15.3416   1 
  -2   0   8 1588.36 30.3860  -2 
  -1   0   8 1588.36 30.3860   1 
  -3   0   8 498.229 7.38378  -2 
   0   0   8 498.229 7.38378   1 
  -4   0   8 42.4634 2.05861  -2 
   1   0   8 42.4634 2.05861   1 
  -5   0   8 317.258 5.70146  -2 
   2   0   8 317.258 5.70146   1 
  -6   0   8 209.416 5.65696  -2 
   3   0   8 209.416 5.65696   1 
  -7   0   8 258.191 6.66719  -2 
   4   0   8 258.191 6.66719   1 
  -8   0   8 200.193 6.20196  -2 
   5   0   8 200.193 6.20196   1 
  -9   0   8 312.971 8.28084  -2 
   6   0   8 312.971 8.28084   1 
   5   1   8 478.736 11.5441  -2 
  -9   1   8 478.736 11.5441   1 
   4   1   8 399.683 9.67381  -2 
  -8   1   8 399.683 9.67381   1 
   3   1   8 804.661 15.2120  -2 
  -7   1   8 804.661 15.2120   1 
   2   1   8 1052.33 14.4819  -2 
  -6   1   8 1052.33 14.4819   1 
   1   1   8 917.969 21.3227  -2 
  -5   1   8 917.969 21.3227   1 
   0   1   8 791.911 13.3318  -2 
  -4   1   8 791.911 13.3318   1 
  -1   1   8 315.595 7.02796  -2 
  -3   1   8 315.595 7.02796   1 
  -2   1   8 125.356 6.03955  -2 
  -2   1   8 125.356 6.03955   1 
  -3   1   8 136.456 3.89139  -2 
  -1   1   8 136.456 3.89139   1 
  -4   1   8 351.509 5.92549  -2 
   0   1   8 351.509 5.92549   1 
  -5   1   8 596.230 8.82275  -2 
   1   1   8 596.230 8.82275   1 
  -6   1   8 1058.59 17.0664  -2 
   2   1   8 1058.59 17.0664   1 
  -7   1   8 905.548 15.5233  -2 
   3   1   8 905.548 15.5233   1 
  -8   1   8 879.167 15.6549  -2 
   4   1   8 879.167 15.6549   1 
  -9   1   8 458.332 10.3365  -2 
   5   1   8 458.332 10.3365   1 
  -9   2   8 134.606 5.62304   1 
  -8   2   8 167.305 5.97559   1 
  -7   2   8 295.084 7.78487   1 
  -6   2   8 3.36651 1.30330   1 
  -5   2   8 70.0116 2.53494   1 
  -4   2   8 244.893 4.84487   1 
  -3   2   8 74.7349 2.42697   1 
  -2   2   8 428.808 6.68208   1 
  -1   2   8 691.489 9.65794   1 
   0   2   8 837.676 11.3564   1 
   1   2   8 433.633 8.58076   1 
   2   2   8 211.868 5.64312   1 
   3   2   8 7.15734 1.49111   1 
   4   2   8 201.517 6.11828   1 
   3   3   8 138.266 5.62944  -2 
  -8   3   8 138.266 5.62944   1 
   2   3   8 271.494 7.59313  -2 
  -7   3   8 271.494 7.59313   1 
   1   3   8 101.073 4.32198  -2 
  -6   3   8 101.073 4.32198   1 
   0   3   8 450.623 9.64537  -2 
  -5   3   8 450.623 9.64537   1 
  -1   3   8 249.578 5.05470  -2 
  -4   3   8 249.578 5.05470   1 
  -2   3   8 35.2687 2.49009  -2 
  -3   3   8 35.2687 2.49009   1 
  -3   3   8 52.5124 2.18691  -2 
  -2   3   8 52.5124 2.18691   1 
  -4   3   8 250.249 5.90303  -2 
  -1   3   8 250.249 5.90303   1 
  -5   3   8 543.268 10.1858  -2 
   0   3   8 543.268 10.1858   1 
  -6   3   8 112.675 4.13548  -2 
   1   3   8 112.675 4.13548   1 
  -7   3   8 243.327 6.51977  -2 
   2   3   8 243.327 6.51977   1 
  -8   3   8 141.164 5.14657  -2 
   3   3   8 141.164 5.14657   1 
  -8   4   8 366.555 9.57295   1 
  -7   4   8 237.206 7.11891   1 
  -6   4   8 12.2518 1.89521   1 
  -5   4   8 88.1030 3.85903   1 
  -4   4   8 496.833 10.1861   1 
  -3   4   8 811.278 14.3534   1 
  -2   4   8 584.259 10.5522   1 
  -1   4   8 240.217 5.91339   1 
   0   4   8 73.9412 3.28270   1 
   1   4   8 7.87800 1.49835   1 
   2   4   8 36.3224 2.85676   1 
   1   5   8 820.896 16.1296  -2 
  -7   5   8 820.896 16.1296   1 
   0   5   8 430.526 10.1669  -2 
  -6   5   8 430.526 10.1669   1 
  -1   5   8 432.734 9.88431  -2 
  -5   5   8 432.734 9.88431   1 
  -4   5   8 99.5125 5.43372  -2 
  -2   5   8 99.5125 5.43372   1 
  -5   5   8 208.743 5.86137  -2 
  -1   5   8 208.743 5.86137   1 
  -6   5   8 250.136 6.67019  -2 
   0   5   8 250.136 6.67019   1 
  -7   5   8 669.183 12.9659  -2 
   1   5   8 669.183 12.9659   1 
  -6   6   8 16.0355 3.13046   1 
  -5   6   8 12.9353 3.70265   1 
  -2   6   8 345.724 11.0205   1 
  -1   6   8 202.141 8.28678   1 
   0   6   8 92.7384 6.00892   1 
  -1 -12   9 155.653 7.65275   1 
   0 -12   9 29.0760 3.58935   1 
   1 -12   9 1.30643 1.62166   1 
   2 -12   9 9.27139 2.30209   1 
   3 -12   9 86.8523 5.22654   1 
   4 -12   9 404.749 12.7471   1 
  -3 -11   9 9.52498 1.92755   1 
  -2 -11   9 22.6102 2.45575   1 
  -1 -11   9 18.6620 2.80719   1 
   0 -11   9 108.167 5.84521   1 
   1 -11   9 159.889 4.85282   1 
   2 -11   9 116.428 5.73094   1 
   3 -11   9 373.541 8.40034   1 
  -1 -11   9 203.526 8.55078  -2 
   4 -11   9 203.526 8.55078   1 
  -2 -11   9 4.39372 2.78841  -2 
   5 -11   9 4.39372 2.78841   1 
   6 -10   9 35.7493 3.49229  -2 
  -4 -10   9 35.7493 3.49229   1 
   5 -10   9 147.783 5.53319  -2 
  -3 -10   9 147.783 5.53319   1 
   4 -10   9 253.542 6.99048  -2 
  -2 -10   9 253.542 6.99048   1 
   3 -10   9 298.733 7.36655  -2 
  -1 -10   9 298.733 7.36655   1 
   0 -10   9 193.270 7.98149  -2 
   2 -10   9 193.270 7.98149   1 
  -1 -10   9 590.483 11.3973  -2 
   3 -10   9 590.483 11.3973   1 
   4 -10   9 268.613 6.96439   1 
  -3 -10   9 96.2699 6.71033  -2 
   5 -10   9 96.2699 6.71033   1 
  -4 -10   9 14.7245 4.69871  -2 
   6 -10   9 14.7245 4.69871   1 
  -5  -9   9 49.7584 3.25711   1 
  -4  -9   9 9.50379 1.72077   1 
  -3  -9   9 14.1935 1.94177   1 
  -2  -9   9 369.555 11.9818   1 
  -1  -9   9 1079.46 17.8135   1 
   0  -9   9 1016.98 11.6345   1 
   1  -9   9 421.304 8.36311   1 
   2  -9   9 151.568 4.48267   1 
   3  -9   9 19.7970 1.89801   1 
   4  -9   9 65.6441 3.21649   1 
   5  -9   9 141.970 4.95952   1 
   6  -9   9 102.641 4.48580   1 
   7  -9   9 257.387 10.1343   1 
   7  -8   9 215.917 6.91017  -2 
  -6  -8   9 215.917 6.91017   1 
   6  -8   9 476.172 10.6125  -2 
  -5  -8   9 476.172 10.6125   1 
   5  -8   9 884.994 15.9293  -2 
  -4  -8   9 884.994 15.9293   1 
   4  -8   9 1049.68 17.6843  -2 
  -3  -8   9 1049.68 17.6843   1 
   3  -8   9 270.328 6.49454  -2 
  -2  -8   9 270.328 6.49454   1 
   2  -8   9 35.5057 1.71183  -2 
  -1  -8   9 35.5057 1.71183   1 
   1  -8   9 146.202 3.37707  -2 
   0  -8   9 146.202 3.37707   1 
   0  -8   9 208.486 4.23275  -2 
   1  -8   9 208.486 4.23275   1 
  -1  -8   9 51.0378 2.48562  -2 
   2  -8   9 51.0378 2.48562   1 
  -2  -8   9 329.464 7.38251  -2 
   3  -8   9 329.464 7.38251   1 
  -3  -8   9 1019.32 17.1652  -2 
   4  -8   9 1019.32 17.1652   1 
  -4  -8   9 937.049 16.4892  -2 
   5  -8   9 937.049 16.4892   1 
  -5  -8   9 440.535 9.96530  -2 
   6  -8   9 440.535 9.96530   1 
  -6  -8   9 101.358 4.58662  -2 
   7  -8   9 101.358 4.58662   1 
  -7  -7   9 64.0810 4.58465   1 
  -6  -7   9 104.530 4.66574   1 
  -5  -7   9 22.9056 2.34599   1 
  -4  -7   9 131.852 4.55880   1 
  -3  -7   9 12.5432 1.26810   1 
  -2  -7   9 48.7097 1.97826   1 
  -1  -7   9 122.928 3.07828   1 
   0  -7   9 133.256 3.13396   1 
   1  -7   9 248.625 4.63729   1 
   2  -7   9 120.491 3.04334   1 
   3  -7   9 12.4024 1.22532   1 
   4  -7   9 30.6986 2.27899   1 
   5  -7   9 136.819 4.77833   1 
   6  -7   9 314.007 8.03512   1 
   7  -7   9 133.412 5.26263   1 
   7  -6   9 474.488 11.1319  -2 
  -7  -6   9 474.488 11.1319   1 
   6  -6   9 649.947 13.1453  -2 
  -6  -6   9 649.947 13.1453   1 
   5  -6   9 155.485 7.35042  -2 
  -5  -6   9 155.485 7.35042   1 
   4  -6   9 352.948 7.74986  -2 
  -4  -6   9 352.948 7.74986   1 
   3  -6   9 772.854 11.0768  -2 
  -3  -6   9 772.854 11.0768   1 
   2  -6   9 419.126 6.88125  -2 
  -2  -6   9 419.126 6.88125   1 
   1  -6   9 482.131 9.40980  -2 
  -1  -6   9 482.131 9.40980   1 
   0  -6   9 207.159 4.12749  -2 
   0  -6   9 207.159 4.12749   1 
  -1  -6   9 1103.52 14.1082  -2 
   1  -6   9 1103.52 14.1082   1 
  -2  -6   9 962.507 12.7648  -2 
   2  -6   9 962.507 12.7648   1 
  -3  -6   9 1179.62 15.2458  -2 
   3  -6   9 1179.62 15.2458   1 
  -4  -6   9 324.334 7.59417  -2 
   4  -6   9 324.334 7.59417   1 
  -5  -6   9 203.037 6.01278  -2 
   5  -6   9 203.037 6.01278   1 
  -6  -6   9 318.056 8.07026  -2 
   6  -6   9 318.056 8.07026   1 
  -7  -6   9 261.573 7.55785  -2 
   7  -6   9 261.573 7.55785   1 
  -8  -5   9 186.498 6.52348   1 
  -7  -5   9 304.090 8.13391   1 
  -6  -5   9 37.5648 2.25786   1 
  -5  -5   9 0.08176 0.83462   1 
  -4  -5   9 45.9172 2.04814   1 
  -3  -5   9 717.458 10.2613   1 
  -2  -5   9 1137.92 14.6692   1 
  -1  -5   9 1600.71 24.6810   1 
   0  -5   9 576.168 8.21658   1 
   1  -5   9 11.0845 1.08694   1 
   2  -5   9 0.93817 0.57746   1 
   3  -5   9 119.716 3.15782   1 
   4  -5   9 148.682 4.57588   1 
   5  -5   9 102.695 3.29657   1 
   6  -5   9 519.051 10.9829   1 
   7  -5   9 565.577 12.0544   1 
  -8  -4   9 5.28561 1.71527   1 
  -7  -4   9 47.7088 2.60809   1 
  -6  -4   9 410.578 7.48155   1 
  -5  -4   9 696.570 10.5052   1 
  -4  -4   9 674.696 9.96013   1 
  -3  -4   9 104.638 2.86149   1 
  -2  -4   9 127.201 3.03234   1 
  -1  -4   9 139.100 4.10225   1 
   0  -4   9 62.1289 2.01276   1 
   1  -4   9 43.8861 1.77538   1 
   2  -4   9 373.202 6.19742   1 
   3  -4   9 639.111 9.39108   1 
   4  -4   9 244.988 5.08227   1 
   5  -4   9 151.271 3.98773   1 
   6  -4   9 3.05533 1.11659   1 
   7  -4   9 99.9375 4.42418   1 
   7  -3   9 243.972 11.3304  -2 
  -9  -3   9 243.972 11.3304   1 
   6  -3   9 72.7862 3.62359  -2 
  -8  -3   9 72.7862 3.62359   1 
   5  -3   9 207.973 6.22194  -2 
  -7  -3   9 207.973 6.22194   1 
   4  -3   9 928.432 13.3527  -2 
  -6  -3   9 928.432 13.3527   1 
   3  -3   9 827.711 11.9454  -2 
  -5  -3   9 827.711 11.9454   1 
   2  -3   9 359.323 6.34748  -2 
  -4  -3   9 359.323 6.34748   1 
   1  -3   9 194.518 4.16126  -2 
  -3  -3   9 194.518 4.16126   1 
   0  -3   9 231.505 5.77356  -2 
  -2  -3   9 231.505 5.77356   1 
  -1  -3   9 394.402 8.09592  -2 
  -1  -3   9 394.402 8.09592   1 
  -2  -3   9 104.885 2.79276  -2 
   0  -3   9 104.885 2.79276   1 
  -3  -3   9 77.0369 2.50779  -2 
   1  -3   9 77.0369 2.50779   1 
  -4  -3   9 159.648 3.76886  -2 
   2  -3   9 159.648 3.76886   1 
  -5  -3   9 849.064 11.8102  -2 
   3  -3   9 849.064 11.8102   1 
  -6  -3   9 961.404 13.2745  -2 
   4  -3   9 961.404 13.2745   1 
  -7  -3   9 454.719 7.94348  -2 
   5  -3   9 454.719 7.94348   1 
  -8  -3   9 44.5193 2.82167  -2 
   6  -3   9 44.5193 2.82167   1 
  -9  -2   9 202.377 7.90373   1 
  -8  -2   9 457.344 8.50108   1 
  -7  -2   9 531.207 11.3027   1 
  -6  -2   9 296.506 5.98193   1 
  -5  -2   9 178.800 4.22715   1 
  -4  -2   9 281.836 5.32344   1 
  -3  -2   9 5.90617 0.88809   1 
  -2  -2   9 215.058 5.44516   1 
  -1  -2   9 457.918 6.93596   1 
   0  -2   9 1520.99 18.4398   1 
   1  -2   9 1860.54 22.2367   1 
   2  -2   9 645.218 9.38440   1 
   3  -2   9 125.567 3.36923   1 
   4  -2   9 0.08828 0.76291   1 
   5  -2   9 72.9702 2.87715   1 
   6  -2   9 64.4407 3.52631   1 
   7  -2   9 260.939 10.6509   1 
   6  -1   9 236.974 10.4203  -2 
  -9  -1   9 236.974 10.4203   1 
   5  -1   9 350.875 8.84754  -2 
  -8  -1   9 350.875 8.84754   1 
   4  -1   9 158.945 4.28013  -2 
  -7  -1   9 158.945 4.28013   1 
   3  -1   9 195.270 4.57697  -2 
  -6  -1   9 195.270 4.57697   1 
   2  -1   9 70.7181 2.55881  -2 
  -5  -1   9 70.7181 2.55881   1 
   1  -1   9 357.722 6.28424  -2 
  -4  -1   9 357.722 6.28424   1 
   0  -1   9 1410.75 22.2514  -2 
  -3  -1   9 1410.75 22.2514   1 
  -1  -1   9 1069.49 17.5258  -2 
  -2  -1   9 1069.49 17.5258   1 
  -2  -1   9 577.798 8.21098  -2 
  -1  -1   9 577.798 8.21098   1 
  -3  -1   9 743.825 10.1794  -2 
   0  -1   9 743.825 10.1794   1 
  -4  -1   9 186.244 3.97876  -2 
   1  -1   9 186.244 3.97876   1 
  -5  -1   9 65.5416 2.34835  -2 
   2  -1   9 65.5416 2.34835   1 
  -6  -1   9 331.237 6.08379  -2 
   3  -1   9 331.237 6.08379   1 
  -7  -1   9 228.956 6.12355  -2 
   4  -1   9 228.956 6.12355   1 
  -8  -1   9 406.535 9.05519  -2 
   5  -1   9 406.535 9.05519   1 
  -9  -1   9 344.668 12.3658  -2 
   6  -1   9 344.668 12.3658   1 
  -9   0   9 141.611 5.99141   1 
  -8   0   9 64.6559 3.82422   1 
  -7   0   9 194.756 5.77896   1 
  -6   0   9 539.714 8.87146   1 
  -5   0   9 27.6948 1.78391   1 
  -4   0   9 106.276 3.07377   1 
  -3   0   9 109.048 3.79314   1 
  -2   0   9 104.410 3.67601   1 
  -1   0   9 165.281 3.55644   1 
   0   0   9 182.751 3.88023   1 
   1   0   9 34.9185 1.78716   1 
   2   0   9 25.6177 1.70132   1 
   3   0   9 131.140 4.48437   1 
   4   0   9 7.52996 1.61038   1 
   5   0   9 95.7120 4.32677   1 
   4   1   9 113.669 5.36714  -2 
  -8   1   9 113.669 5.36714   1 
   3   1   9 1382.47 23.4069  -2 
  -7   1   9 1382.47 23.4069   1 
   2   1   9 1503.19 19.7431  -2 
  -6   1   9 1503.19 19.7431   1 
   1   1   9 445.217 7.68746  -2 
  -5   1   9 445.217 7.68746   1 
   0   1   9 812.744 11.6424  -2 
  -4   1   9 812.744 11.6424   1 
  -1   1   9 276.804 6.74045  -2 
  -3   1   9 276.804 6.74045   1 
  -2   1   9 -1.1029 1.90274  -2 
  -2   1   9 -1.1029 1.90274   1 
  -3   1   9 239.960 4.71393  -2 
  -1   1   9 239.960 4.71393   1 
  -4   1   9 360.727 6.27178  -2 
   0   1   9 360.727 6.27178   1 
  -5   1   9 451.528 9.00600  -2 
   1   1   9 451.528 9.00600   1 
  -6   1   9 1350.89 21.2155  -2 
   2   1   9 1350.89 21.2155   1 
  -7   1   9 1412.42 22.4527  -2 
   3   1   9 1412.42 22.4527   1 
  -8   1   9 285.551 7.78762  -2 
   4   1   9 285.551 7.78762   1 
   3   2   9 202.824 7.29805  -2 
  -8   2   9 202.824 7.29805   1 
   2   2   9 210.210 7.07217  -2 
  -7   2   9 210.210 7.07217   1 
   1   2   9 247.623 9.95293  -2 
  -6   2   9 247.623 9.95293   1 
   0   2   9 215.301 8.07520  -2 
  -5   2   9 215.301 8.07520   1 
  -1   2   9 530.684 14.4818  -2 
  -4   2   9 530.684 14.4818   1 
  -2   2   9 396.713 11.8707  -2 
  -3   2   9 396.713 11.8707   1 
  -3   2   9 958.388 16.5258  -2 
  -2   2   9 958.388 16.5258   1 
  -4   2   9 1405.92 21.4556  -2 
  -1   2   9 1405.92 21.4556   1 
  -5   2   9 468.352 9.27424  -2 
   0   2   9 468.352 9.27424   1 
  -6   2   9 383.019 8.48286  -2 
   1   2   9 383.019 8.48286   1 
  -7   2   9 162.407 7.51323  -2 
   2   2   9 162.407 7.51323   1 
  -8   2   9 168.320 5.88156  -2 
   3   2   9 168.320 5.88156   1 
  -8   3   9 2.23637 2.01064   1 
  -7   3   9 0.52326 1.31519   1 
  -6   3   9 86.6175 4.08816   1 
  -5   3   9 411.262 9.24858   1 
  -4   3   9 491.044 10.0374   1 
  -3   3   9 84.1070 3.54701   1 
  -2   3   9 1.03116 1.09115   1 
  -1   3   9 63.8464 2.97682   1 
   0   3   9 147.520 4.61615   1 
   1   3   9 69.8190 3.36603   1 
   2   3   9 102.602 4.25113   1 
   1   4   9 46.0880 3.86261  -2 
  -7   4   9 46.0880 3.86261   1 
   0   4   9 74.0019 4.15924  -2 
  -6   4   9 74.0019 4.15924   1 
  -1   4   9 155.142 8.00994  -2 
  -5   4   9 155.142 8.00994   1 
  -2   4   9 398.981 13.2618  -2 
  -4   4   9 398.981 13.2618   1 
  -4   4   9 274.166 9.81469  -2 
  -2   4   9 274.166 9.81469   1 
  -5   4   9 73.3772 3.50542  -2 
  -1   4   9 73.3772 3.50542   1 
  -6   4   9 69.6290 3.59808  -2 
   0   4   9 69.6290 3.59808   1 
  -7   4   9 56.3206 3.53056  -2 
   1   4   9 56.3206 3.53056   1 
  -6   5   9 323.677 12.6858   1 
  -1   5   9 56.6429 3.17857   1 
   0   5   9 251.091 9.46156   1 
   1 -12  10 9.82466 2.63169  -2 
   2 -12  10 9.82466 2.63169   1 
   0 -12  10 139.297 6.96581  -2 
   3 -12  10 139.297 6.96581   1 
  -3 -11  10 6.05473 1.57945   1 
  -2 -11  10 8.68184 1.81493   1 
  -1 -11  10 33.7929 3.52292   1 
   2 -11  10 443.954 12.8250   1 
   3 -11  10 227.714 6.30870   1 
   4 -11  10 38.4679 2.73592   1 
   5 -11  10 0.80569 1.15507   1 
  -4 -10  10 38.7586 4.82519   1 
  -3 -10  10 208.091 9.24166   1 
   4 -10  10 393.981 9.27306  -2 
  -2 -10  10 393.981 9.27306   1 
  -1 -10  10 63.0853 3.22363   1 
   0 -10  10 31.9870 3.41461   1 
   1 -10  10 16.3141 1.71940   1 
   0 -10  10 215.492 6.03885  -2 
   2 -10  10 215.492 6.03885   1 
   3 -10  10 129.843 4.52676   1 
   4 -10  10 122.605 4.55722   1 
  -3 -10  10 177.910 9.10408  -2 
   5 -10  10 177.910 9.10408   1 
  -5  -9  10 78.6710 5.52499   1 
   5  -9  10 41.2973 5.83881  -2 
  -4  -9  10 41.2973 5.83881   1 
   4  -9  10 208.795 8.56113  -2 
  -3  -9  10 208.795 8.56113   1 
  -2  -9  10 517.720 10.4216   1 
   2  -9  10 626.069 17.1832  -2 
  -1  -9  10 626.069 17.1832   1 
   1  -9  10 449.128 13.2200  -2 
   0  -9  10 449.128 13.2200   1 
   0  -9  10 234.628 8.19357  -2 
   1  -9  10 234.628 8.19357   1 
  -1  -9  10 271.719 10.1667  -2 
   2  -9  10 271.719 10.1667   1 
   3  -9  10 1.21329 0.84627   1 
   4  -9  10 85.8027 3.78053   1 
   5  -9  10 114.561 4.64493   1 
   6  -9  10 86.8373 5.73349   1 
  -6  -8  10 434.758 14.5565   1 
  -5  -8  10 799.540 15.2913   1 
  -4  -8  10 372.843 8.80383   1 
  -3  -8  10 424.303 9.15619   1 
  -2  -8  10 172.726 4.08885   1 
  -1  -8  10 2.56467 1.05276   1 
   0  -8  10 54.5239 2.74322   1 
   1  -8  10 5.07344 0.89305   1 
   2  -8  10 360.462 6.30272   1 
   3  -8  10 771.355 13.8635   1 
   4  -8  10 1054.27 18.0451   1 
   5  -8  10 540.280 11.3231   1 
   6  -8  10 75.8056 3.92638   1 
   6  -7  10 63.8199 3.97093  -2 
  -6  -7  10 63.8199 3.97093   1 
   5  -7  10 62.3765 3.60921  -2 
  -5  -7  10 62.3765 3.60921   1 
   4  -7  10 101.167 5.58687  -2 
  -4  -7  10 101.167 5.58687   1 
   3  -7  10 26.4178 1.85596  -2 
  -3  -7  10 26.4178 1.85596   1 
   2  -7  10 352.163 7.93737  -2 
  -2  -7  10 352.163 7.93737   1 
   1  -7  10 610.633 11.6087  -2 
  -1  -7  10 610.633 11.6087   1 
   0  -7  10 915.571 15.7159  -2 
   0  -7  10 915.571 15.7159   1 
  -1  -7  10 420.246 6.90343  -2 
   1  -7  10 420.246 6.90343   1 
  -2  -7  10 318.926 5.79365  -2 
   2  -7  10 318.926 5.79365   1 
  -3  -7  10 51.5375 2.26794  -2 
   3  -7  10 51.5375 2.26794   1 
  -4  -7  10 239.993 6.52020  -2 
   4  -7  10 239.993 6.52020   1 
  -5  -7  10 126.148 4.80626  -2 
   5  -7  10 126.148 4.80626   1 
  -6  -7  10 58.6266 3.62768  -2 
   6  -7  10 58.6266 3.62768   1 
  -7  -6  10 88.8457 4.44865   1 
  -6  -6  10 81.3458 4.04264   1 
  -5  -6  10 74.6910 2.90857   1 
  -4  -6  10 243.235 5.15980   1 
  -3  -6  10 125.193 3.39246   1 
  -2  -6  10 -0.0328 0.82703   1 
  -1  -6  10 31.4333 2.20548   1 
   0  -6  10 554.202 10.5960   1 
   1  -6  10 721.547 12.1391   1 
   2  -6  10 154.424 3.70372   1 
   3  -6  10 85.6742 2.77765   1 
   4  -6  10 114.976 3.37613   1 
   5  -6  10 29.3657 2.57403   1 
   6  -6  10 -0.4215 1.12242   1 
   6  -5  10 695.432 14.1209  -2 
  -7  -5  10 695.432 14.1209   1 
   5  -5  10 205.315 6.18448  -2 
  -6  -5  10 205.315 6.18448   1 
   4  -5  10 335.767 6.60155  -2 
  -5  -5  10 335.767 6.60155   1 
   3  -5  10 445.544 7.65635  -2 
  -4  -5  10 445.544 7.65635   1 
   2  -5  10 932.235 12.8907  -2 
  -3  -5  10 932.235 12.8907   1 
   1  -5  10 1308.35 21.1182  -2 
  -2  -5  10 1308.35 21.1182   1 
   0  -5  10 584.352 11.1313  -2 
  -1  -5  10 584.352 11.1313   1 
  -1  -5  10 388.041 8.28107  -2 
   0  -5  10 388.041 8.28107   1 
  -2  -5  10 610.888 10.6814  -2 
   1  -5  10 610.888 10.6814   1 
  -3  -5  10 412.409 6.91667  -2 
   2  -5  10 412.409 6.91667   1 
  -4  -5  10 598.697 9.21418  -2 
   3  -5  10 598.697 9.21418   1 
  -5  -5  10 584.445 9.28883  -2 
   4  -5  10 584.445 9.28883   1 
  -6  -5  10 436.712 9.92066  -2 
   5  -5  10 436.712 9.92066   1 
  -7  -5  10 878.222 16.2952  -2 
   6  -5  10 878.222 16.2952   1 
  -8  -4  10 67.9124 3.41107   1 
  -7  -4  10 329.344 6.88939   1 
  -6  -4  10 897.322 13.2393   1 
  -5  -4  10 557.338 9.09174   1 
  -4  -4  10 38.8601 1.98972   1 
  -3  -4  10 113.021 4.03228   1 
  -2  -4  10 96.2552 3.58926   1 
  -1  -4  10 63.9978 2.89753   1 
   0  -4  10 131.401 3.29557   1 
   1  -4  10 72.1587 2.41155   1 
   2  -4  10 260.568 6.05474   1 
   3  -4  10 780.738 11.2486   1 
   4  -4  10 697.861 10.5729   1 
   5  -4  10 39.9382 2.33455   1 
   6  -4  10 30.9418 2.76774   1 
   7  -4  10 54.4209 5.42160   1 
  -9  -3  10 98.2037 8.93138   1 
  -8  -3  10 -0.8050 1.06757   1 
  -7  -3  10 1.22502 1.22668   1 
   4  -3  10 143.952 7.61944  -2 
  -6  -3  10 143.952 7.61944   1 
  -5  -3  10 83.6855 2.94091   1 
  -4  -3  10 117.600 3.30911   1 
  -3  -3  10 357.373 7.95038   1 
  -2  -3  10 98.1638 3.67307   1 
  -1  -3  10 418.091 8.68192   1 
   0  -3  10 776.378 10.6688   1 
   1  -3  10 5.22957 0.91735   1 
   2  -3  10 249.373 5.00051   1 
   3  -3  10 181.217 4.26613   1 
   4  -3  10 249.443 5.34674   1 
   5  -3  10 90.3530 3.27759   1 
   6  -3  10 38.2969 2.55221   1 
   5  -2  10 312.001 8.66633  -2 
  -8  -2  10 312.001 8.66633   1 
   4  -2  10 337.063 7.01836  -2 
  -7  -2  10 337.063 7.01836   1 
   3  -2  10 165.016 4.54134  -2 
  -6  -2  10 165.016 4.54134   1 
   2  -2  10 275.084 5.69405  -2 
  -5  -2  10 275.084 5.69405   1 
   1  -2  10 285.661 7.11652  -2 
  -4  -2  10 285.661 7.11652   1 
   0  -2  10 334.781 7.72923  -2 
  -3  -2  10 334.781 7.72923   1 
  -1  -2  10 1199.20 19.7127  -2 
  -2  -2  10 1199.20 19.7127   1 
  -2  -2  10 1515.21 23.9157  -2 
  -1  -2  10 1515.21 23.9157   1 
  -3  -2  10 753.752 10.4907  -2 
   0  -2  10 753.752 10.4907   1 
  -4  -2  10 400.706 6.83144  -2 
   1  -2  10 400.706 6.83144   1 
  -5  -2  10 380.724 6.73547  -2 
   2  -2  10 380.724 6.73547   1 
  -6  -2  10 79.5958 3.70695  -2 
   3  -2  10 79.5958 3.70695   1 
  -7  -2  10 218.678 6.30524  -2 
   4  -2  10 218.678 6.30524   1 
  -8  -2  10 144.370 5.46192  -2 
   5  -2  10 144.370 5.46192   1 
  -8  -1  10 154.688 5.83964   1 
  -7  -1  10 101.226 3.54486   1 
  -6  -1  10 190.741 4.70718   1 
  -5  -1  10 662.712 10.2652   1 
  -4  -1  10 536.205 10.7500   1 
  -3  -1  10 879.545 15.4351   1 
  -2  -1  10 462.172 9.46177   1 
  -1  -1  10 151.332 4.68441   1 
   0  -1  10 30.0194 1.69398   1 
   1  -1  10 11.8886 1.29383   1 
   2  -1  10 65.8410 2.53826   1 
   3  -1  10 436.555 7.61136   1 
   4  -1  10 718.317 13.4988   1 
   5  -1  10 580.770 12.5667   1 
   4   0  10 224.381 7.02470  -2 
  -8   0  10 224.381 7.02470   1 
   3   0  10 303.590 8.07639  -2 
  -7   0  10 303.590 8.07639   1 
   2   0  10 210.841 4.95719  -2 
  -6   0  10 210.841 4.95719   1 
   1   0  10 125.830 3.64654  -2 
  -5   0  10 125.830 3.64654   1 
   0   0  10 75.0075 3.42306  -2 
  -4   0  10 75.0075 3.42306   1 
  -1   0  10 205.759 5.67723  -2 
  -3   0  10 205.759 5.67723   1 
  -2   0  10 87.3491 3.58007  -2 
  -2   0  10 87.3491 3.58007   1 
  -3   0  10 204.525 5.67754  -2 
  -1   0  10 204.525 5.67754   1 
  -4   0  10 160.802 3.80651  -2 
   0   0  10 160.802 3.80651   1 
  -5   0  10 141.762 3.67697  -2 
   1   0  10 141.762 3.67697   1 
  -6   0  10 381.520 8.36236  -2 
   2   0  10 381.520 8.36236   1 
  -7   0  10 211.368 6.09317  -2 
   3   0  10 211.368 6.09317   1 
  -8   0  10 126.301 4.87892  -2 
   4   0  10 126.301 4.87892   1 
  -8   1  10 54.3538 5.18602   1 
  -7   1  10 251.419 7.36398   1 
  -6   1  10 279.815 5.99470   1 
  -5   1  10 86.6815 3.78580   1 
  -4   1  10 101.710 4.02947   1 
  -3   1  10 235.911 6.25983   1 
  -2   1  10 113.626 4.13541   1 
  -1   1  10 2.85673 1.21351   1 
   0   1  10 57.4116 2.37086   1 
   1   1  10 251.334 6.32987   1 
   2   1  10 429.634 9.23636   1 
   3   1  10 285.502 7.49287   1 
   2   2  10 333.904 9.16009  -2 
  -7   2  10 333.904 9.16009   1 
   1   2  10 190.815 9.55810  -2 
  -6   2  10 190.815 9.55810   1 
   0   2  10 129.910 7.55500  -2 
  -5   2  10 129.910 7.55500   1 
  -1   2  10 466.812 10.0806  -2 
  -4   2  10 466.812 10.0806   1 
  -2   2  10 748.273 13.9589  -2 
  -3   2  10 748.273 13.9589   1 
  -3   2  10 1186.70 19.9885  -2 
  -2   2  10 1186.70 19.9885   1 
  -4   2  10 1023.28 24.7624  -2 
  -1   2  10 1023.28 24.7624   1 
  -5   2  10 291.157 7.14458  -2 
   0   2  10 291.157 7.14458   1 
  -6   2  10 171.287 5.59170  -2 
   1   2  10 171.287 5.59170   1 
  -7   2  10 133.960 7.00432  -2 
   2   2  10 133.960 7.00432   1 
  -6   3  10 465.535 15.5492   1 
  -1   3  10 414.124 14.7234  -2 
  -5   3  10 414.124 14.7234   1 
  -2   3  10 326.563 12.4332  -2 
  -4   3  10 326.563 12.4332   1 
  -3   3  10 204.621 8.69527  -2 
  -3   3  10 204.621 8.69527   1 
  -2   3  10 4.49925 1.92065   1 
  -5   3  10 177.847 8.42526  -2 
  -1   3  10 177.847 8.42526   1 
  -6   3  10 235.474 9.19221  -2 
   0   3  10 235.474 9.19221   1 
  -7   3  10 73.9541 5.90428  -2 
   1   3  10 73.9541 5.90428   1 
  -6   4  10 70.2877 6.87513   1 
  -5   4  10 57.1896 5.30758   1 
  -2   4  10 68.5899 5.09172   1 
  -1   4  10 189.241 8.38102   1 
   0   4  10 154.049 7.27647   1 
   4 -11  11 4.61427 2.94566  -2 
  -2 -11  11 4.61427 2.94566   1 
   0 -11  11 711.017 19.6533  -2 
   2 -11  11 711.017 19.6533   1 
  -1 -11  11 341.074 8.26997  -2 
   3 -11  11 341.074 8.26997   1 
  -2 -11  11 0.49842 1.52436  -2 
   4 -11  11 0.49842 1.52436   1 
  -4 -10  11 120.581 6.66298   1 
  -3 -10  11 216.753 9.84319   1 
  -2 -10  11 250.993 10.0988   1 
  -1 -10  11 130.347 6.76226   1 
   0 -10  11 8.68540 2.20251   1 
   1 -10  11 69.6988 4.87509   1 
   2 -10  11 20.5253 2.03067   1 
   3 -10  11 3.57814 1.19614   1 
   4 -10  11 148.048 5.25865   1 
   5  -9  11 42.3552 3.74722  -2 
  -4  -9  11 42.3552 3.74722   1 
   4  -9  11 95.3755 6.97108  -2 
  -3  -9  11 95.3755 6.97108   1 
   2  -9  11 191.295 5.98984  -2 
  -1  -9  11 191.295 5.98984   1 
   1  -9  11 109.465 4.48006  -2 
   0  -9  11 109.465 4.48006   1 
  -1  -9  11 94.2839 4.07323  -2 
   2  -9  11 94.2839 4.07323   1 
  -2  -9  11 160.102 8.18618  -2 
   3  -9  11 160.102 8.18618   1 
  -3  -9  11 51.2968 5.59851  -2 
   4  -9  11 51.2968 5.59851   1 
  -4  -9  11 84.4968 4.61536  -2 
   5  -9  11 84.4968 4.61536   1 
  -5  -8  11 564.445 12.0723   1 
   4  -8  11 421.966 13.4045  -2 
  -4  -8  11 421.966 13.4045   1 
   3  -8  11 503.099 15.6902  -2 
  -3  -8  11 503.099 15.6902   1 
   2  -8  11 287.062 10.7514  -2 
  -2  -8  11 287.062 10.7514   1 
   1  -8  11 65.5491 3.71183  -2 
  -1  -8  11 65.5491 3.71183   1 
   0  -8  11 25.8121 3.84056  -2 
   0  -8  11 25.8121 3.84056   1 
  -1  -8  11 140.643 6.67471  -2 
   1  -8  11 140.643 6.67471   1 
  -2  -8  11 470.680 14.7030  -2 
   2  -8  11 470.680 14.7030   1 
   3  -8  11 795.328 14.4360   1 
  -4  -8  11 582.042 17.8756  -2 
   4  -8  11 582.042 17.8756   1 
  -5  -8  11 362.860 13.6952  -2 
   5  -8  11 362.860 13.6952   1 
  -6  -7  11 124.779 5.27028   1 
  -5  -7  11 24.2215 2.53919   1 
  -4  -7  11 1.19875 0.81505   1 
  -3  -7  11 4.06026 1.25959   1 
  -2  -7  11 111.310 4.21370   1 
  -1  -7  11 1050.07 18.0181   1 
   0  -7  11 1495.39 23.9685   1 
   1  -7  11 520.582 10.4744   1 
   2  -7  11 75.8869 2.70579   1 
   3  -7  11 -0.4383 0.70923   1 
   4  -7  11 138.020 4.92082   1 
   5  -7  11 191.913 6.27037   1 
   5  -6  11 132.691 7.17378  -2 
  -6  -6  11 132.691 7.17378   1 
   4  -6  11 434.914 7.96152  -2 
  -5  -6  11 434.914 7.96152   1 
   3  -6  11 682.811 13.3044  -2 
  -4  -6  11 682.811 13.3044   1 
   2  -6  11 167.886 5.36461  -2 
  -3  -6  11 167.886 5.36461   1 
   1  -6  11 99.2004 4.02800  -2 
  -2  -6  11 99.2004 4.02800   1 
   0  -6  11 224.937 6.17657  -2 
  -1  -6  11 224.937 6.17657   1 
  -1  -6  11 219.897 6.03673  -2 
   0  -6  11 219.897 6.03673   1 
  -2  -6  11 140.656 6.49108  -2 
   1  -6  11 140.656 6.49108   1 
  -3  -6  11 117.043 3.46688  -2 
   2  -6  11 117.043 3.46688   1 
  -4  -6  11 296.784 5.89213  -2 
   3  -6  11 296.784 5.89213   1 
  -5  -6  11 231.307 5.22807  -2 
   4  -6  11 231.307 5.22807   1 
  -6  -6  11 266.116 7.41323  -2 
   5  -6  11 266.116 7.41323   1 
  -7  -5  11 134.765 4.37878   1 
  -6  -5  11 0.39143 0.90835   1 
  -5  -5  11 438.729 7.88667   1 
  -4  -5  11 287.863 7.36888   1 
  -3  -5  11 314.098 7.66508   1 
  -2  -5  11 914.906 16.1315   1 
  -1  -5  11 103.215 3.87871   1 
   0  -5  11 9.56351 1.54264   1 
   1  -5  11 126.430 3.38927   1 
   2  -5  11 2.36761 0.89083   1 
   3  -5  11 114.337 3.43389   1 
   4  -5  11 457.904 8.04334   1 
   5  -5  11 479.322 8.71030   1 
   6  -5  11 234.021 11.1332   1 
   5  -4  11 455.078 10.5829  -2 
  -7  -4  11 455.078 10.5829   1 
   4  -4  11 624.496 10.3618  -2 
  -6  -4  11 624.496 10.3618   1 
   3  -4  11 720.171 11.1869  -2 
  -5  -4  11 720.171 11.1869   1 
   2  -4  11 485.059 10.3591  -2 
  -4  -4  11 485.059 10.3591   1 
   1  -4  11 541.295 11.0077  -2 
  -3  -4  11 541.295 11.0077   1 
   0  -4  11 345.257 8.09717  -2 
  -2  -4  11 345.257 8.09717   1 
  -1  -4  11 6.54309 1.96975  -2 
  -1  -4  11 6.54309 1.96975   1 
  -2  -4  11 785.620 14.2954  -2 
   0  -4  11 785.620 14.2954   1 
  -3  -4  11 1146.57 15.1245  -2 
   1  -4  11 1146.57 15.1245   1 
  -4  -4  11 821.835 11.8049  -2 
   2  -4  11 821.835 11.8049   1 
  -5  -4  11 1121.29 18.3304  -2 
   3  -4  11 1121.29 18.3304   1 
  -6  -4  11 361.160 6.95327  -2 
   4  -4  11 361.160 6.95327   1 
  -7  -4  11 261.514 5.93488  -2 
   5  -4  11 261.514 5.93488   1 
  -8  -3  11 60.5698 3.25297   1 
  -7  -3  11 0.35117 0.98964   1 
  -6  -3  11 -0.7571 0.87790   1 
  -5  -3  11 2.30912 1.28553   1 
  -4  -3  11 2.25877 1.09595   1 
  -3  -3  11 263.327 6.79157   1 
  -2  -3  11 603.454 11.7889   1 
  -1  -3  11 272.857 6.80928   1 
  -3  -3  11 202.847 8.37368  -2 
   0  -3  11 202.847 8.37368   1 
   1  -3  11 17.9974 1.51030   1 
   2  -3  11 3.41942 0.91147   1 
   3  -3  11 74.7892 2.85886   1 
   4  -3  11 127.389 3.87357   1 
   5  -3  11 192.794 5.04351   1 
   4  -2  11 187.279 6.55801  -2 
  -7  -2  11 187.279 6.55801   1 
   3  -2  11 588.829 16.9221  -2 
  -6  -2  11 588.829 16.9221   1 
   2  -2  11 220.809 8.98216  -2 
  -5  -2  11 220.809 8.98216   1 
   1  -2  11 40.0915 4.65523  -2 
  -4  -2  11 40.0915 4.65523   1 
  -3  -2  11 19.2284 2.11680   1 
  -2  -2  11 348.313 8.12299   1 
  -1  -2  11 687.244 12.9657   1 
  -3  -2  11 528.085 10.8762  -2 
   0  -2  11 528.085 10.8762   1 
  -4  -2  11 40.2987 2.53560  -2 
   1  -2  11 40.2987 2.53560   1 
  -5  -2  11 115.251 3.77311  -2 
   2  -2  11 115.251 3.77311   1 
  -6  -2  11 273.126 5.90961  -2 
   3  -2  11 273.126 5.90961   1 
   4  -2  11 0.44325 1.14856   1 
   4  -1  11 355.109 13.0441  -2 
  -8  -1  11 355.109 13.0441   1 
   3  -1  11 302.860 6.69193  -2 
  -7  -1  11 302.860 6.69193   1 
   2  -1  11 638.880 13.0450  -2 
  -6  -1  11 638.880 13.0450   1 
   1  -1  11 755.365 14.4939  -2 
  -5  -1  11 755.365 14.4939   1 
   0  -1  11 734.088 14.0665  -2 
  -4  -1  11 734.088 14.0665   1 
  -1  -1  11 426.522 9.56880  -2 
  -3  -1  11 426.522 9.56880   1 
  -2  -1  11 197.982 6.01866  -2 
  -2  -1  11 197.982 6.01866   1 
  -3  -1  11 241.060 6.67640  -2 
  -1  -1  11 241.060 6.67640   1 
  -4  -1  11 337.678 8.21680  -2 
   0  -1  11 337.678 8.21680   1 
  -5  -1  11 323.810 6.34447  -2 
   1  -1  11 323.810 6.34447   1 
  -6  -1  11 440.606 7.89740  -2 
   2  -1  11 440.606 7.89740   1 
  -7  -1  11 576.911 11.7016  -2 
   3  -1  11 576.911 11.7016   1 
  -8   0  11 179.308 9.60154   1 
  -7   0  11 268.449 7.83714   1 
  -6   0  11 150.454 5.31779   1 
  -5   0  11 1.50407 1.23793   1 
  -4   0  11 41.1543 2.90494   1 
  -3   0  11 42.7462 2.83048   1 
  -2   0  11 40.3973 2.74653   1 
  -1   0  11 480.110 10.1568   1 
   0   0  11 962.769 17.1186   1 
   1   0  11 590.896 9.61585   1 
   2   0  11 313.592 7.66625   1 
   3   0  11 78.8534 5.30692   1 
   1   1  11 90.9890 6.43410  -2 
  -6   1  11 90.9890 6.43410   1 
   0   1  11 238.087 6.76715  -2 
  -5   1  11 238.087 6.76715   1 
  -1   1  11 251.711 6.91649  -2 
  -4   1  11 251.711 6.91649   1 
  -2   1  11 145.746 5.05107  -2 
  -3   1  11 145.746 5.05107   1 
  -3   1  11 74.8278 3.64531  -2 
  -2   1  11 74.8278 3.64531   1 
  -4   1  11 132.132 4.81677  -2 
  -1   1  11 132.132 4.81677   1 
  -5   1  11 152.319 7.32224  -2 
   0   1  11 152.319 7.32224   1 
  -6   1  11 170.619 5.36803  -2 
   1   1  11 170.619 5.36803   1 
  -7   1  11 163.260 7.41135  -2 
   2   1  11 163.260 7.41135   1 
  -6   2  11 80.0269 6.86025   1 
  -5   2  11 7.04202 2.69770   1 
  -4   2  11 42.3458 3.08483   1 
  -3   2  11 480.701 10.4606   1 
  -2   2  11 570.748 12.5913   1 
  -1   2  11 252.495 9.84749   1 
   0   2  11 146.530 7.39726   1 
   1   2  11 12.7683 2.60751   1 
  -2   3  11 358.628 13.3381  -2 
  -4   3  11 358.628 13.3381   1 
  -3   3  11 55.1519 5.57551  -2 
  -3   3  11 55.1519 5.57551   1 
  -4   3  11 194.645 9.04319  -2 
  -2   3  11 194.645 9.04319   1 
  -2 -11  12 11.2593 3.35633   1 
  -1 -11  12 318.546 12.1737   1 
   1 -11  12 469.953 15.8748   1 
   3 -11  12 18.2999 2.47551   1 
   3 -10  12 345.572 12.3864  -2 
  -2 -10  12 345.572 12.3864   1 
   2 -10  12 103.671 6.39083  -2 
  -1 -10  12 103.671 6.39083   1 
   1 -10  12 19.2460 3.32038  -2 
   0 -10  12 19.2460 3.32038   1 
   0 -10  12 20.6502 3.17622  -2 
   1 -10  12 20.6502 3.17622   1 
  -1 -10  12 104.557 6.28984  -2 
   2 -10  12 104.557 6.28984   1 
  -2 -10  12 252.502 7.00675  -2 
   3 -10  12 252.502 7.00675   1 
  -3 -10  12 508.566 15.1776  -2 
   4 -10  12 508.566 15.1776   1 
  -3  -9  12 8.96677 2.58769   1 
  -2  -9  12 26.8014 2.57086   1 
  -1  -9  12 69.8343 3.62794   1 
   0  -9  12 33.2383 2.65278   1 
   1  -9  12 170.021 5.48657   1 
   2  -9  12 313.875 11.5575   1 
   3  -9  12 130.555 4.83222   1 
   4  -9  12 20.6421 2.45357   1 
   3  -8  12 335.308 8.66373  -2 
  -3  -8  12 335.308 8.66373   1 
   2  -8  12 231.867 6.86799  -2 
  -2  -8  12 231.867 6.86799   1 
   1  -8  12 167.294 5.72538  -2 
  -1  -8  12 167.294 5.72538   1 
   0  -8  12 140.168 5.21717  -2 
   0  -8  12 140.168 5.21717   1 
  -1  -8  12 386.634 9.04991  -2 
   1  -8  12 386.634 9.04991   1 
  -2  -8  12 466.293 13.9683  -2 
   2  -8  12 466.293 13.9683   1 
  -3  -8  12 481.038 10.5177  -2 
   3  -8  12 481.038 10.5177   1 
  -4  -8  12 313.251 8.33211  -2 
   4  -8  12 313.251 8.33211   1 
  -6  -7  12 130.631 7.34571   1 
  -5  -7  12 49.5877 7.17575   1 
  -4  -7  12 11.2725 1.86256   1 
  -3  -7  12 30.9056 2.63290   1 
  -2  -7  12 519.203 11.0084   1 
   0  -7  12 1302.00 30.4962  -2 
  -1  -7  12 1302.00 30.4962   1 
   0  -7  12 501.633 10.6148   1 
  -2  -7  12 371.358 12.7673  -2 
   1  -7  12 371.358 12.7673   1 
   2  -7  12 8.93163 2.20761   1 
   3  -7  12 32.0544 2.63494   1 
   4  -7  12 139.961 5.18453   1 
   5  -7  12 252.747 9.99102   1 
  -6  -6  12 229.724 6.04661   1 
  -5  -6  12 486.359 10.9272   1 
  -4  -6  12 284.878 7.66795   1 
  -3  -6  12 382.391 9.09620   1 
  -2  -6  12 68.6366 3.50086   1 
  -1  -6  12 10.0231 1.67907   1 
   0  -6  12 15.3291 1.94972   1 
   1  -6  12 137.593 4.78969   1 
   2  -6  12 42.0778 2.22114   1 
   3  -6  12 129.973 3.83984   1 
   4  -6  12 627.473 10.2673   1 
   5  -6  12 267.228 11.0617   1 
   5  -5  12 133.852 5.50120  -2 
  -7  -5  12 133.852 5.50120   1 
   4  -5  12 137.989 5.57488  -2 
  -6  -5  12 137.989 5.57488   1 
   3  -5  12 385.969 9.47164  -2 
  -5  -5  12 385.969 9.47164   1 
   2  -5  12 421.974 9.85993  -2 
  -4  -5  12 421.974 9.85993   1 
   1  -5  12 207.843 6.37313  -2 
  -3  -5  12 207.843 6.37313   1 
   0  -5  12 82.6658 4.06643  -2 
  -2  -5  12 82.6658 4.06643   1 
  -1  -5  12 87.8244 3.99658  -2 
  -1  -5  12 87.8244 3.99658   1 
  -2  -5  12 130.583 4.85772  -2 
   0  -5  12 130.583 4.85772   1 
  -3  -5  12 128.584 4.81429  -2 
   1  -5  12 128.584 4.81429   1 
  -4  -5  12 182.915 4.58592  -2 
   2  -5  12 182.915 4.58592   1 
  -5  -5  12 190.894 5.83243  -2 
   3  -5  12 190.894 5.83243   1 
  -6  -5  12 248.180 5.77772  -2 
   4  -5  12 248.180 5.77772   1 
  -7  -4  12 254.554 7.56552   1 
  -6  -4  12 200.299 6.46549   1 
  -5  -4  12 246.209 7.11089   1 
  -4  -4  12 169.479 5.61714   1 
  -3  -4  12 104.308 4.28815   1 
  -2  -4  12 0.75601 1.04018   1 
  -1  -4  12 228.756 6.39035   1 
   0  -4  12 873.265 15.8032   1 
   1  -4  12 1035.16 18.1794   1 
   2  -4  12 609.444 9.66878   1 
   3  -4  12 219.809 5.18118   1 
   4  -4  12 1.72507 1.02418   1 
   3  -3  12 62.8509 3.91543  -2 
  -6  -3  12 62.8509 3.91543   1 
   2  -3  12 114.742 4.89294  -2 
  -5  -3  12 114.742 4.89294   1 
   1  -3  12 171.991 5.76933  -2 
  -4  -3  12 171.991 5.76933   1 
   0  -3  12 458.664 10.1902  -2 
  -3  -3  12 458.664 10.1902   1 
  -1  -3  12 1010.26 17.9422  -2 
  -2  -3  12 1010.26 17.9422   1 
  -2  -3  12 837.402 15.5030  -2 
  -1  -3  12 837.402 15.5030   1 
  -3  -3  12 262.137 7.12609  -2 
   0  -3  12 262.137 7.12609   1 
  -4  -3  12 78.4608 3.98560  -2 
   1  -3  12 78.4608 3.98560   1 
  -5  -3  12 112.226 3.68386  -2 
   2  -3  12 112.226 3.68386   1 
  -6  -3  12 140.539 4.18201  -2 
   3  -3  12 140.539 4.18201   1 
  -7  -3  12 186.781 9.05326  -2 
   4  -3  12 186.781 9.05326   1 
  -7  -2  12 35.9156 4.19055   1 
  -6  -2  12 262.078 7.51781   1 
  -5  -2  12 221.951 6.72779   1 
  -4  -2  12 2.41277 1.31211   1 
  -3  -2  12 32.2881 2.71763   1 
  -2  -2  12 130.207 4.81122   1 
  -3  -2  12 65.7232 5.77101  -2 
  -1  -2  12 65.7232 5.77101   1 
  -4  -2  12 6.49957 4.03310  -2 
   0  -2  12 6.49957 4.03310   1 
   1  -2  12 64.1548 3.50170   1 
   2  -2  12 96.4490 3.38675   1 
   3  -2  12 180.818 4.93931   1 
   2  -1  12 605.223 17.6150  -2 
  -6  -1  12 605.223 17.6150   1 
   1  -1  12 468.446 10.8434  -2 
  -5  -1  12 468.446 10.8434   1 
   0  -1  12 375.493 9.36782  -2 
  -4  -1  12 375.493 9.36782   1 
  -1  -1  12 311.409 8.25385  -2 
  -3  -1  12 311.409 8.25385   1 
  -2  -1  12 68.1044 4.21554  -2 
  -2  -1  12 68.1044 4.21554   1 
  -3  -1  12 157.524 5.76857  -2 
  -1  -1  12 157.524 5.76857   1 
  -4  -1  12 161.607 5.89699  -2 
   0  -1  12 161.607 5.89699   1 
  -5  -1  12 272.448 7.82164  -2 
   1  -1  12 272.448 7.82164   1 
  -6  -1  12 449.363 13.4468  -2 
   2  -1  12 449.363 13.4468   1 
   1   0  12 456.221 14.7218  -2 
  -6   0  12 456.221 14.7218   1 
   0   0  12 331.012 8.74219  -2 
  -5   0  12 331.012 8.74219   1 
  -1   0  12 384.395 9.50741  -2 
  -4   0  12 384.395 9.50741   1 
  -2   0  12 154.780 5.79396  -2 
  -3   0  12 154.780 5.79396   1 
  -3   0  12 287.082 7.92632  -2 
  -2   0  12 287.082 7.92632   1 
  -4   0  12 762.025 14.7806  -2 
  -1   0  12 762.025 14.7806   1 
  -5   0  12 692.399 19.4329  -2 
   0   0  12 692.399 19.4329   1 
  -5   1  12 178.128 6.49967   1 
  -4   1  12 360.395 9.00287   1 
  -3   1  12 388.969 9.39019   1 
  -2   1  12 95.2620 4.33369   1 
  -1   1  12 7.06767 2.49091   1 
  -2 -10  13 299.121 14.0383   1 
  -1 -10  13 65.5266 3.77214   1 
   0 -10  13 -2.7094 1.62740   1 
   1 -10  13 14.5275 3.06509   1 
   2 -10  13 148.896 11.5572   1 
   2  -9  13 116.593 4.83700  -2 
  -2  -9  13 116.593 4.83700   1 
   1  -9  13 371.659 9.12695  -2 
  -1  -9  13 371.659 9.12695   1 
   0  -9  13 701.893 14.0265  -2 
   0  -9  13 701.893 14.0265   1 
  -1  -9  13 602.359 12.4494  -2 
   1  -9  13 602.359 12.4494   1 
  -2  -9  13 262.528 10.6975  -2 
   2  -9  13 262.528 10.6975   1 
  -4  -9  13 13.3873 3.52270  -2 
   4  -9  13 13.3873 3.52270   1 
  -4  -8  13 166.180 12.0510   1 
  -3  -8  13 113.773 4.88125   1 
  -2  -8  13 85.6825 4.16375   1 
  -1  -8  13 -0.5236 0.99626   1 
   0  -8  13 44.1500 3.07324   1 
   1  -8  13 161.771 5.52755   1 
   2  -8  13 151.688 5.34851   1 
   4  -8  13 89.1866 5.78223   1 
   4  -7  13 49.0422 5.69751  -2 
  -5  -7  13 49.0422 5.69751   1 
   3  -7  13 202.865 9.80412  -2 
  -4  -7  13 202.865 9.80412   1 
   2  -7  13 421.383 10.2358  -2 
  -3  -7  13 421.383 10.2358   1 
   1  -7  13 842.479 16.1261  -2 
  -2  -7  13 842.479 16.1261   1 
   0  -7  13 493.927 11.0411  -2 
  -1  -7  13 493.927 11.0411   1 
  -1  -7  13 350.426 8.89209  -2 
   0  -7  13 350.426 8.89209   1 
  -2  -7  13 404.813 9.65405  -2 
   1  -7  13 404.813 9.65405   1 
  -3  -7  13 177.491 6.13887  -2 
   2  -7  13 177.491 6.13887   1 
  -4  -7  13 102.255 6.84414  -2 
   3  -7  13 102.255 6.84414   1 
  -5  -7  13 107.854 6.80816  -2 
   4  -7  13 107.854 6.80816   1 
  -5  -6  13 431.650 14.7854   1 
  -4  -6  13 308.029 8.31349   1 
  -3  -6  13 81.6914 4.07240   1 
  -2  -6  13 62.8399 3.54399   1 
  -1  -6  13 6.97544 1.53531   1 
  -2  -6  13 86.6532 6.68907  -2 
   0  -6  13 86.6532 6.68907   1 
   1  -6  13 168.575 5.64498   1 
   2  -6  13 288.866 7.75049   1 
   3  -6  13 558.138 11.5213   1 
   4  -6  13 375.808 9.16689   1 
  -5  -5  13 4.26380 1.51583   1 
  -4  -5  13 12.5374 2.04296   1 
  -3  -5  13 32.9307 2.81812   1 
  -2  -5  13 88.7206 4.17734   1 
  -1  -5  13 197.171 6.12228   1 
   0  -5  13 262.151 7.22104   1 
   1  -5  13 130.581 5.01562   1 
   2  -5  13 7.20266 1.67189   1 
   3  -5  13 57.7383 2.82611   1 
   2  -4  13 283.073 8.17831  -2 
  -5  -4  13 283.073 8.17831   1 
   1  -4  13 183.454 6.36031  -2 
  -4  -4  13 183.454 6.36031   1 
   0  -4  13 196.429 6.49118  -2 
  -3  -4  13 196.429 6.49118   1 
  -1  -4  13 245.900 7.22596  -2 
  -2  -4  13 245.900 7.22596   1 
  -2  -4  13 522.629 11.4365  -2 
  -1  -4  13 522.629 11.4365   1 
  -3  -4  13 411.074 9.76976  -2 
   0  -4  13 411.074 9.76976   1 
  -4  -4  13 279.345 7.80867  -2 
   1  -4  13 279.345 7.80867   1 
  -5  -4  13 217.375 6.95474  -2 
   2  -4  13 217.375 6.95474   1 
  -6  -4  13 65.7377 5.28751  -2 
   3  -4  13 65.7377 5.28751   1 
  -5  -3  13 346.589 9.06087   1 
  -4  -3  13 409.467 9.85064   1 
  -3  -3  13 771.794 15.0650   1 
  -2  -3  13 800.033 21.1461   1 
  -1  -3  13 181.958 6.00911   1 
   0  -3  13 54.7938 3.39117   1 
   1  -3  13 1.07283 1.31859   1 
   2  -3  13 15.0139 2.57651   1 
   3  -3  13 52.2240 3.85586   1 
   1  -2  13 174.632 8.54750  -2 
  -5  -2  13 174.632 8.54750   1 
   0  -2  13 184.867 6.40996  -2 
  -4  -2  13 184.867 6.40996   1 
  -1  -2  13 23.0835 2.95824  -2 
  -3  -2  13 23.0835 2.95824   1 
  -2  -2  13 19.0982 2.68443  -2 
  -2  -2  13 19.0982 2.68443   1 
  -3  -2  13 58.4430 3.54327  -2 
  -1  -2  13 58.4430 3.54327   1 
  -4  -2  13 379.315 9.29907  -2 
   0  -2  13 379.315 9.29907   1 
  -5  -2  13 226.174 9.84542  -2 
   1  -2  13 226.174 9.84542   1 
  -6  -2  13 276.377 11.2225  -2 
   2  -2  13 276.377 11.2225   1 
  -5  -1  13 138.547 7.47165   1 
  -4  -1  13 79.2389 4.33601   1 
  -3  -1  13 91.5904 4.41094   1 
  -2  -1  13 31.1658 2.85787   1 
  -1  -1  13 8.87733 2.67103   1 
   0  -1  13 25.8137 4.10595   1 
  -1  -9  14 467.968 21.5883   1 
   0  -9  14 644.236 18.7532   1 
   1  -9  14 332.318 12.3437   1 
  -1  -8  14 32.5205 4.22849  -2 
   0  -8  14 32.5205 4.22849   1 
  -2  -8  14 202.848 9.16332  -2 
   1  -8  14 202.848 9.16332   1 
  -3  -8  14 206.265 9.21148  -2 
   2  -8  14 206.265 9.21148   1 
  -3  -7  14 227.142 11.2018   1 
  -2  -7  14 271.645 7.94665   1 
  -1  -7  14 124.503 5.05370   1 
   0  -7  14 4.49877 1.56438   1 
   1  -7  14 52.1538 4.79779   1 
   2  -7  14 120.415 6.82766   1 
  -1  -6  14 7.68951 2.80037  -2 
  -1  -6  14 7.68951 2.80037   1 
  -2  -6  14 387.818 13.4870  -2 
   0  -6  14 387.818 13.4870   1 
  -3  -5  14 36.5422 4.15343   1 
  -2  -5  14 297.329 8.29171   1 
  -1  -5  14 350.056 12.3476   1 
   0  -5  14 313.928 11.5668   1 
  -2  -4  14 68.5889 4.59047   1 
   0   0   0    0.00    0.00   0 
; 
_shelx_hkl_checksum   95906 
  
